# Supplementary material for: Catalytic asymmetric synthesis of carboranylated diols bearing two adjacent stereocenters located at the α,β-position ofo-carborane cage carbon
Source: Royal Society of Chemistry journal article supplement (doi:10.1039/d3dt00129f), 2023-01-01
Supplement: d3dt00129f1.pdf [file d3dt00129f1.pdf]

# Catalytic Asymmetric Synthesis of Carboranylated Diols Bearing Two Adjacent Stereocenters Located at the $\alpha$ , $\beta$ -Position of *o*-Carborane Cage Carbon

Hui-Xin Duan,<sup>a</sup> Hao-Nan Li,<sup>a</sup> Yong Yang,<sup>b</sup> Xiao-Jun Wu<sup>b</sup> and You-Qing Wang<sup>\*a,b</sup>

<sup>a</sup>Provincial Key Laboratory of Natural Medicine and Immuno-Engineering, Henan University, Kaifeng, Henan, 475004, P. R. China

<sup>b</sup>Zhengzhou Yuanli Biological Technology Co., Ltd., Zhengzhou, Henan, 450001, P. R. China

Fax: (+86)-371-22864665; E-mail: wyouqing@hotmail.com or yqwang@henu.edu.cn

## Supporting Information

### Table of Contents.

|                                                                      |    |
|----------------------------------------------------------------------|----|
| 1. General information.....                                          | S2 |
| 2. Optimization of reaction conditions.....                          | S2 |
| 3. Synthesis of alkenylcarboranes.....                               | S3 |
| 4. 2D-NOESY NMR of compound 6.....                                   | S5 |
| 5. X-ray for compound 2c.....                                        | S6 |
| 6. Comparison of NMR data of 2a and 1,2-diphenylethane-1,2-diol..... | S7 |
| Copy of NMR, HRMS and HPLC for new compounds .....                   | S9 |

## 1. General information

$^1\text{H}$  NMR spectra were recorded on a Bruker DPX-300 spectrometer at 300 MHz.  $^{13}\text{C}$   $\{^1\text{H}\}$  NMR spectra were recorded on Bruker DRX-300 spectrometers at 75 MHz.  $^{19}\text{F}$  NMR spectra were recorded on a Bruker DPX-400 spectrometer at 376 MHz.  $^{11}\text{B}$  NMR spectra were recorded on a Bruker DPX-400 spectrometer at 128 MHz. The chemical shifts for  $^1\text{H}$  NMR were recorded in ppm ( $\delta$ ) relative to tetramethylsilane (TMS) with the solvent resonance employed as the internal standard ( $\text{CDCl}_3$ , d 7.26 ppm). The chemical shifts for  $^{13}\text{C}$  NMR were recorded in ppm downfield using the central peak of deuteriochloroform (77.0 ppm) as the internal standard. The ee values determination was carried out using chiral HPLC with Daicel chiral column on Agilent 1200. Flash column chromatography was performed on silica gel (200-300 mesh). TLC analysis was performed using glass-backed plates coated with 0.2 mm silica. The solvents were distilled from appropriate drying agents prior to use, unless otherwise noted.

## 2. Optimization of reaction conditions

**Table S1. Optimization of reaction conditions<sup>a</sup>**

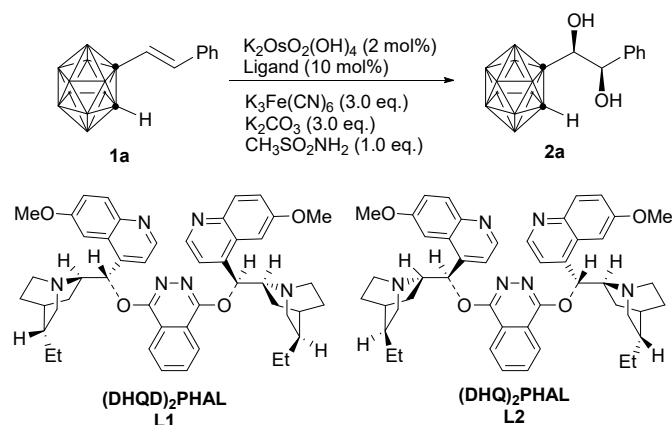

| Entry | Ligand                   | solvent <sup>b</sup>                | T/(°C) | C/(mol/l) | Yield(%) <sup>c</sup> | ee(%) <sup>d</sup> |
|-------|--------------------------|-------------------------------------|--------|-----------|-----------------------|--------------------|
| 1     | AD-mix- $\beta$          | <i>t</i> -BuOH/H <sub>2</sub> O=1/1 | 0      | 0.1       | trace                 |                    |
| 2     | (DHQD) <sub>2</sub> PHAL | <i>t</i> -BuOH/H <sub>2</sub> O=1/1 | 0      | 0.1       | 86                    | -92                |
| 3     | (DHQ) <sub>2</sub> PHAL  | <i>t</i> -BuOH/H <sub>2</sub> O=1/1 | 0      | 0.1       | 89                    | 80                 |
| 4     | (DHQD) <sub>2</sub> PHAL | <i>t</i> -BuOH/H <sub>2</sub> O=1/1 | 15     | 0.1       | 91                    | -96                |
| 5     | (DHQD) <sub>2</sub> PHAL | <i>t</i> -BuOH/H <sub>2</sub> O=1/1 | 25     | 0.1       | 89                    | -97                |
| 6     | (DHQD) <sub>2</sub> PHAL | <i>t</i> -BuOH/H <sub>2</sub> O=1/1 | 35     | 0.1       | 82                    | -94                |
| 7     | (DHQ) <sub>2</sub> PHAL  | <i>t</i> -BuOH/H <sub>2</sub> O=1/1 | 25     | 0.1       | 92                    | 88                 |
| 8     | (DHQD) <sub>2</sub> PHAL | Acetone/H <sub>2</sub> O=1/1        | 25     | 0.1       | 22                    | -93                |
| 9     | (DHQ) <sub>2</sub> PHAL  | Acetone/H <sub>2</sub> O=1/1        | 25     | 0.1       | 17                    | 93                 |
| 10    | (DHQD) <sub>2</sub> PHAL | DMSO/H <sub>2</sub> O=1/1           | 25     | 0.1       | NR                    |                    |
| 11    | (DHQ) <sub>2</sub> -PHAL | DMSO/H <sub>2</sub> O=1/1           | 25     | 0.1       | NR                    |                    |
| 12    | (DHQD) <sub>2</sub> PHAL | MeCN/H <sub>2</sub> O=1/1           | 25     | 0.1       | NR                    |                    |
| 13    | (DHQ) <sub>2</sub> PHAL  | MeCN/H <sub>2</sub> O=1/1           | 25     | 0.1       | NR                    |                    |
| 14    | (DHQD) <sub>2</sub> PHAL | <i>t</i> -BuOH/H <sub>2</sub> O=1/3 | 25     | 0.1       | 66                    | -95                |
| 15    | (DHQ) <sub>2</sub> PHAL  | <i>t</i> -BuOH/H <sub>2</sub> O=1/3 | 25     | 0.1       | 71                    | 94                 |
| 16    | (DHQD) <sub>2</sub> PHAL | <i>t</i> -BuOH/H <sub>2</sub> O=3/1 | 25     | 0.1       | 57                    | -94                |

|    |                          |                                     |    |       |    |     |
|----|--------------------------|-------------------------------------|----|-------|----|-----|
| 17 | (DHQ) <sub>2</sub> PHAL  | <i>t</i> -BuOH/H <sub>2</sub> O=3/1 | 25 | 0.1   | 61 | 90  |
| 18 | (DHQD) <sub>2</sub> PHAL | <i>t</i> -BuOH/H <sub>2</sub> O=1/1 | 25 | 0.067 | 89 | -96 |
| 19 | (DHQ) <sub>2</sub> PHAL  | <i>t</i> -BuOH/H <sub>2</sub> O=1/1 | 25 | 0.067 | 91 | 90  |
| 20 | (DHQD) <sub>2</sub> PHAL | <i>t</i> -BuOH/H <sub>2</sub> O=1/1 | 25 | 0.2   | 84 | -95 |
| 21 | (DHQ) <sub>2</sub> PHAL  | <i>t</i> -BuOH/H <sub>2</sub> O=1/1 | 25 | 0.2   | 91 | 90  |

<sup>a</sup>Unless indicated otherwise, the reactions were performed with 0.2 mmol of alkenylcarborane **1a** in 2 ml of solvent at indicated temperature for 24 hours. <sup>b</sup>Volume ratio. <sup>c</sup>Isolated yield for syn-1,2-diol isomer and no d.r. value with the anti-1,2-diol isomer undetectable in all cases. <sup>d</sup>Determined by HPLC using a chiral column. The minus sign indicates the opposite enantiomer.

### 3. Synthesis of Alkenylcarboranes (**1a-1m**, **3**, **5**).

The alkenylcarborane **1a-1l**, **3** and **5** was synthesized according to method A described in the literature <sup>[1]</sup>, **1a'**, **1m** was synthesized according to method B in the literature <sup>[2]</sup>

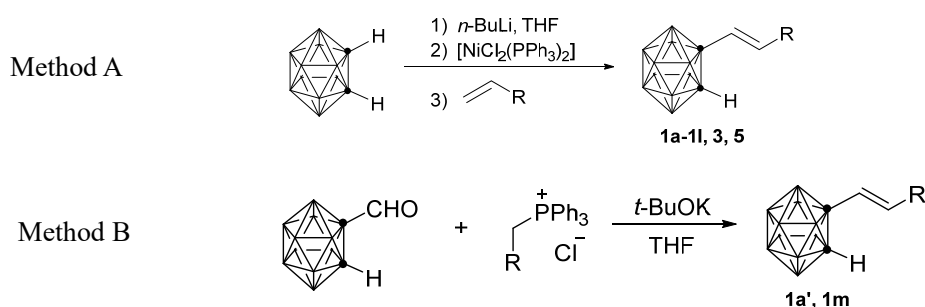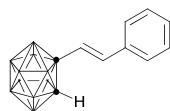

**1a**: Known compound; <sup>1</sup>H NMR (300 MHz, CDCl<sub>3</sub>): δ 7.35 (s, 5H), 6.83 (d, *J* = 16.1 Hz, 1H), 6.27 (d, *J* = 16.1 Hz, 1H), 3.71 (s, 1H).

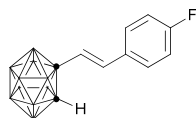

**1b**: Known compound; <sup>1</sup>H NMR (300 MHz, CDCl<sub>3</sub>): δ 7.35 (s, 2H), 7.15 (m, 3H), 6.67 (d, *J* = 15.2 Hz, 1H), 3.68 (s, 1H).

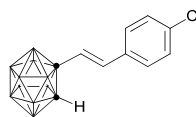

**1c**: *R*<sub>f</sub> = 0.21 (hexane); White solid, 104.6 mg, 37% yield, mp: 106-107 °C. <sup>1</sup>H NMR (300 MHz, CDCl<sub>3</sub>) δ 7.41 – 7.26 (m, 4H), 6.81 (d, *J* = 15.7 Hz, 1H), 6.25 (d, *J* = 15.7 Hz, 1H), 3.72 (s, 1H). <sup>13</sup>C {<sup>1</sup>H} NMR (75 MHz, CDCl<sub>3</sub>) δ 136.45, 135.36, 132.56, 129.13, 128.14, 123.06, 73.77, 60.82. <sup>11</sup>B NMR (128 MHz, CDCl<sub>3</sub>) δ -1.80 ((dd, *J* = 148.4, 1.3 Hz, 1B), -4.77 (dd, *J* = 137.3, 4.8 Hz, 1B), -7.04- -115.87 (m, 8B). HRMS (ESI) *m/z* calcd for C<sub>10</sub>H<sub>16</sub>B<sub>10</sub>Cl<sup>+</sup> (M-H)<sup>+</sup> 280.1913, found 280.1926.

<sup>[1]</sup> Z. Qiu and Z. Xie, *Angew. Chem., Int. Ed.*, 2008, **47**, 6572–6575.

<sup>[2]</sup> A. Sousa-Pedrares, C. Vinas and F. Teixidor, *Chem. Commun.*, 2010, **46**, 2998–3000.

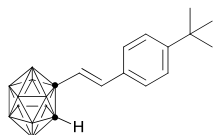

**1d:**  $R_f = 0.27$  (hexane); colorless oil, 123.8mg, 41% yield.  $^1\text{H}$  NMR (300 MHz,  $\text{CDCl}_3$ )  $\delta$  7.41 – 7.22 (m, 4H), 6.83 (d,  $J = 15.7$  Hz, 1H), 6.23 (d,  $J = 15.7$  Hz, 1H), 3.69 (s, 1H), 1.31 (s, 9H).  $^{13}\text{C}$   $\{^1\text{H}\}$  NMR (75 MHz,  $\text{CDCl}_3$ )  $\delta$  152.98, 137.44, 131.26, 126.69, 125.83, 121.57, 60.95, 34.74, 31.13.  $^{11}\text{B}$  NMR (128 MHz,  $\text{CDCl}_3$ )  $\delta$  -1.88 (d,  $J = 151.5$  Hz, 1B), -5.03 (d,  $J = 141.2$  Hz, 1B), -7.82 - -17.51 (m, 8B). HRMS (ESI)  $m/z$  calcd for  $\text{C}_{14}\text{H}_{25}\text{B}_{10}^-$  (M-H) $^-$  301.2965, found 301.2968.

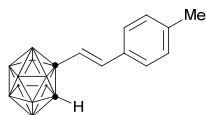

**1e:** Known compound;  $^1\text{H}$  NMR (300 MHz,  $\text{CDCl}_3$ ):  $\delta$  7.24 (d,  $J = 8.0$  Hz, 2H), 7.14 (d,  $J = 8.0$  Hz, 2H), 6.80 (d,  $J = 15.8$  Hz, 1H), 6.29 (d,  $J = 15.8$  Hz, 1H), 3.70 (s, 1H).

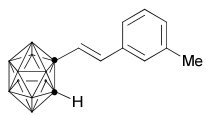

**1f:** Known compound;  $^1\text{H}$  NMR (300 MHz,  $\text{CDCl}_3$ ):  $\delta$  7.24 (m, 4H), 7.02 (d,  $J = 15.4$  Hz, 1H), 6.41 (d,  $J = 15.4$  Hz, 1H), 3.73 (s, 1H), 2.34 (s, 3H).

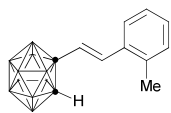

**1g:**  $R_f = 0.24$  (hexane); White solid, 376.4 mg, 64% yield, mp: 82-84 °C.  $^1\text{H}$  NMR (300 MHz,  $\text{CDCl}_3$ )  $\delta$  7.51 – 6.95 (m, 5H), 6.16 (d,  $J = 15.6$  Hz, 1H), 3.72 (s, 1H), 2.35 (s, 3H).  $^{13}\text{C}$   $\{^1\text{H}\}$  NMR (75 MHz,  $\text{CDCl}_3$ )  $\delta$  136.34, 135.89, 133.24, 130.66, 129.30, 126.34, 125.53, 123.78, 74.32, 60.87, 19.59.  $^{11}\text{B}$  NMR (128 MHz,  $\text{CDCl}_3$ )  $\delta$  -1.82 (d,  $J = 150.7$  Hz, 1B), -4.94 (d,  $J = 153.5$  Hz, 1B), -7.75 - -15.94 (m, 8H). HRMS (ESI)  $m/z$  calcd for  $\text{C}_{11}\text{H}_{19}\text{B}_{10}^-$  (M-H) $^-$  260.2459, found 260.2462.

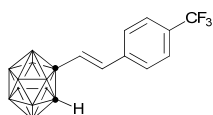

**1h:** Known compound;  $^1\text{H}$  NMR (300 MHz,  $\text{CDCl}_3$ ):  $\delta$  7.61 (d,  $J = 8.1$  Hz, 2H), 7.45 (d,  $J = 8.1$  Hz, 2H), 6.88 (d,  $J = 15.9$  Hz, 1H), 6.22 (d,  $J = 15.9$  Hz, 1H), 3.74 (s, 1H).

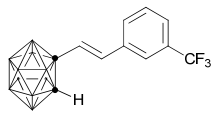

**1i:** Known compound;  $^1\text{H}$  NMR (300 MHz,  $\text{CDCl}_3$ ):  $\delta$  7.48 (m, 4H), 6.89 (d,  $J = 15.8$  Hz, 1H), 6.34 (d,  $J = 15.8$  Hz, 1H), 3.74 (s, 1H).

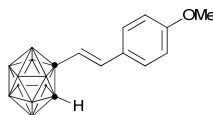

**1j:** Known compound;  $^1\text{H}$  NMR (300 MHz,  $\text{CDCl}_3$ ):  $\delta$  7.35 – 7.21 (m, 2H), 6.91 – 6.84 (m, 2H), 6.79 (d,  $J = 15.7$  Hz, 1H), 6.14 (d,  $J = 15.7$  Hz, 1H), 3.82 (s, 3H), 3.70 (s, 1H).

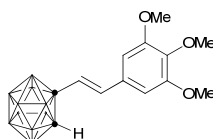

**1k:** Known compound;  $^1\text{H}$  NMR (300 MHz,  $\text{CDCl}_3$ ):  $\delta$  7.61 (d,  $J = 8.1$  Hz, 2H), 7.45 (d,  $J = 8.1$  Hz, 2H), 6.88 (d,  $J = 15.9$  Hz, 1H), 6.22 (d,  $J = 15.9$  Hz, 1H), 3.74 (s, 1H).

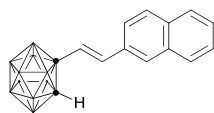

**11:** Rf = 0.16 (hexane); White solid, 85.6mg, 29% yield, mp: 112-114 °C.  $^1\text{H}$  NMR (300 MHz,  $\text{CDCl}_3$ )  $\delta$  7.90 – 7.71 (m, 4H), 7.58 – 7.43 (m, 3H), 7.02 (d,  $J$  = 15.7 Hz, 1H), 6.40 (d,  $J$  = 15.7 Hz, 1H), 3.76 (s, 1H).  $^{13}\text{C}$  {1H} NMR (75 MHz,  $\text{CDCl}_3$ )  $\delta$  137.83, 133.69, 133.26, 131.49, 128.72, 128.28, 128.25, 127.75, 126.95, 126.79, 122.73, 122.59, 74.24, 60.99.  $^{11}\text{B}$  NMR (128 MHz,  $\text{CDCl}_3$ )  $\delta$  -1.80 (d,  $J$  = 153.1 Hz, 1B), -4.85 (d,  $J$  = 143.0 Hz, 1B), -8.50- 12.17 (m, 8B). HRMS (ESI)  $m/z$  calcd for  $\text{C}_{14}\text{H}_{19}\text{B}_{10}^-$  (M-H) $^-$  296.2459, found 296.2462.

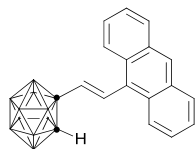

**1m:** Known compound;  $^1\text{H}$  NMR (300 MHz,  $\text{CDCl}_3$ ): 8.43 (s, 1H), 8.00 (m, 4H), 7.74 (m, 1H), 7.51 (m, 4H), 6.18 (d,  $J$  = 15.9 Hz, 1H), 3.88 (br, 1H).

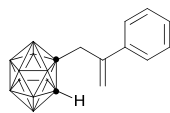

**3:** Known compound;  $^1\text{H}$  NMR (300 MHz,  $\text{CDCl}_3$ ): 7.36 (m, 5H), 5.48 (s, 1H), 5.20 (s, 1H), 3.49 (s, 2H), 3.37 (br, 1H).

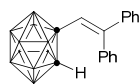

**5:** Known compound;  $^1\text{H}$  NMR (300 MHz,  $\text{CDCl}_3$ ):  $\delta$  7.43 (m, 3H), 7.45 (m, 3H), 7.15 (m, 4H), 6.25 (s, 1H), 2.99 (s, 1H).

#### 4. 2D-NOESY NMR of compound 6

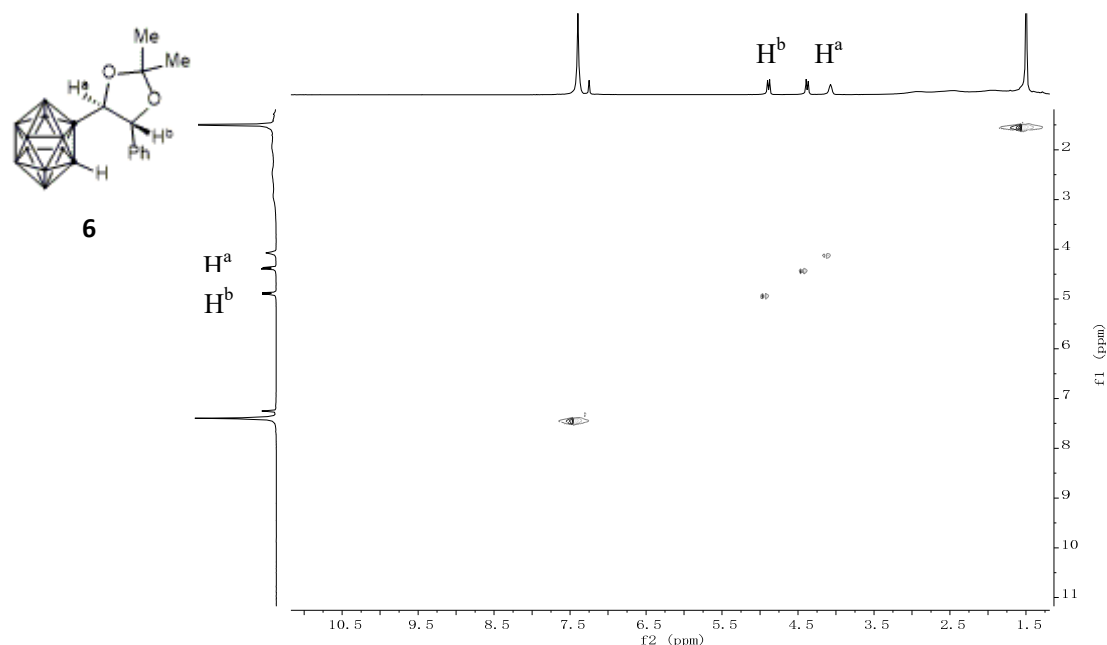

**Scheme S1** 2D-NOESY NMR of the compound **6**

The relative stereochemistry of compound **6** was determined by 2D-NOESY NMR (**Scheme S1**). No NOE effect was observed for between  $\text{H}^a$  and  $\text{H}^b$ .

## 5. X-ray structure for compound 2c

A single crystal of the compound **2c** (CCDC 2067838) was grown from its solution in dichloromethane and hexane, which is suitable for X-ray diffraction analysis. The correctness of the X-ray data and the structure had been checked by using the CheckCIF utility on the submission Web site: <http://checkcif.iucr.org>

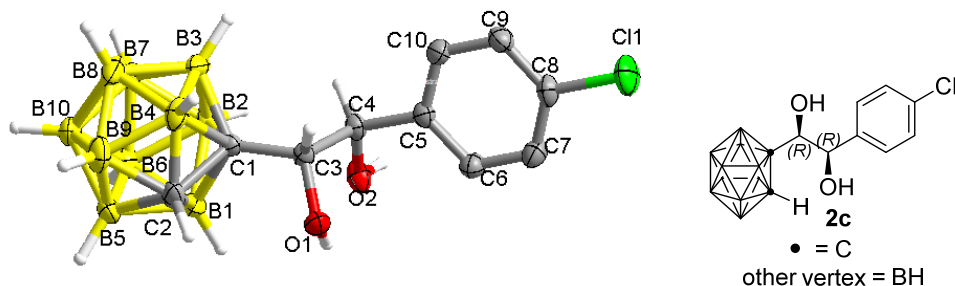

**Table S2. Crystal data and structure refinement for 2c**

|                                             |                                                                  |
|---------------------------------------------|------------------------------------------------------------------|
| Identification code                         | 20210108                                                         |
| Empirical formula                           | C <sub>10</sub> H <sub>19</sub> B <sub>10</sub> ClO <sub>2</sub> |
| Formula weight                              | 314.80                                                           |
| Temperature/K                               | 293(2)                                                           |
| Crystal system                              | orthorhombic                                                     |
| Space group                                 | P2 <sub>1</sub> 2 <sub>1</sub> 2 <sub>1</sub>                    |
| a/Å                                         | 9.4651(9)                                                        |
| b/Å                                         | 12.7542(6)                                                       |
| c/Å                                         | 13.7835(5)                                                       |
| α/°                                         | 90                                                               |
| β/°                                         | 90                                                               |
| γ/°                                         | 90                                                               |
| Volume/Å <sup>3</sup>                       | 1663.95(18)                                                      |
| Z                                           | 4                                                                |
| ρ <sub>calc</sub> /cm <sup>3</sup>          | 1.257                                                            |
| μ/mm <sup>-1</sup>                          | 1.965                                                            |
| F(000)                                      | 648.0                                                            |
| Crystal size/mm <sup>3</sup>                | 0.16 × 0.12 × 0.1                                                |
| Radiation                                   | CuKα (λ = 1.54184)                                               |
| 2θ range for data collection/°              | 9.448 to 142.078                                                 |
| Index ranges                                | -7 ≤ h ≤ 11, -15 ≤ k ≤ 15, -15 ≤ l ≤ 16                          |
| Reflections collected                       | 6530                                                             |
| Independent reflections                     | 3145 [R <sub>int</sub> = 0.0317, R <sub>sigma</sub> = 0.0434]    |
| Data/restraints/parameters                  | 3145/2/215                                                       |
| Goodness-of-fit on F <sup>2</sup>           | 1.027                                                            |
| Final R indexes [I > 2σ (I)]                | R <sub>1</sub> = 0.0456, wR <sub>2</sub> = 0.1191                |
| Final R indexes [all data]                  | R <sub>1</sub> = 0.0527, wR <sub>2</sub> = 0.1265                |
| Largest diff. peak/hole / e Å <sup>-3</sup> | 0.16/-0.25                                                       |
| Flack parameter                             | 0.000(15)                                                        |

**Table S3. Bond Lengths for 2c**

| Atom | Atom | Length/Å  | Atom | Atom | Length/Å  |
|------|------|-----------|------|------|-----------|
| C1   | C8   | 1.742 (3) | B1   | B2   | 1.770 (6) |
| O1   | C3   | 1.418 (4) | B1   | B5   | 1.781 (6) |
| O2   | C4   | 1.415 (4) | B1   | B6   | 1.767 (6) |
| C1   | C2   | 1.640 (4) | B2   | B3   | 1.774 (6) |
| C1   | C3   | 1.538 (4) | B2   | B6   | 1.775 (5) |
| C1   | B1   | 1.718 (5) | B2   | B7   | 1.769 (6) |
| C1   | B2   | 1.712 (5) | B3   | B4   | 1.765 (7) |
| C1   | B3   | 1.702 (4) | B3   | B7   | 1.775 (6) |
| C1   | B4   | 1.738 (5) | B3   | B8   | 1.774 (6) |
| C2   | B1   | 1.708 (6) | B4   | B8   | 1.754 (7) |
| C2   | B4   | 1.709 (6) | B4   | B9   | 1.761 (7) |
| C2   | B5   | 1.703 (6) | B5   | B6   | 1.771 (6) |
| C2   | B9   | 1.709 (6) | B5   | B9   | 1.779 (8) |
| C3   | C4   | 1.538 (4) | B5   | B10  | 1.762 (6) |
| C4   | C5   | 1.517 (4) | B6   | B7   | 1.781 (6) |
| C5   | C6   | 1.389 (5) | B6   | B10  | 1.773 (6) |
| C5   | C10  | 1.385 (5) | B7   | B8   | 1.771 (8) |
| C6   | C7   | 1.377 (5) | B7   | B10  | 1.776 (6) |
| C7   | C8   | 1.374 (5) | B8   | B9   | 1.767 (8) |
| C8   | C9   | 1.375 (5) | B8   | B10  | 1.794 (7) |
| C9   | C10  | 1.393 (5) | B9   | B10  | 1.768 (7) |

**Table S4. Bond Angles for 2c**

| Atom | Atom | Atom | Angle/°  | Atom | Atom | Atom | Angle/°  | Atom | Atom | Atom | Angle/°   | Atom | Atom | Atom | Angle/°  |
|------|------|------|----------|------|------|------|----------|------|------|------|-----------|------|------|------|----------|
| C2   | C1   | B1   | 61.1(2)  | C1   | B4   | B3   | 58.1(2)  | C9   | C8   | C11  | 119.2(3)  | B8   | B7   | B10  | 60.8(3)  |
| C2   | C1   | B2   | 109.9(3) | C1   | B4   | B8   | 105.2(3) | C8   | C9   | C10  | 118.7(3)  | B10  | B7   | B6   | 59.8(3)  |
| C2   | C1   | B3   | 109.7(3) | C1   | B4   | B9   | 105.2(3) | C5   | C10  | C9   | 120.8(3)  | B3   | B8   | B10  | 107.6(3) |
| C2   | C1   | B4   | 60.7(2)  | C2   | B4   | C1   | 56.8(2)  | C1   | B1   | B2   | 58.78(19) | B4   | B8   | B3   | 60.0(2)  |
| C3   | C1   | C2   | 117.0(2) | C2   | B4   | B3   | 103.7(3) | C1   | B1   | B5   | 105.1(3)  | B4   | B8   | B7   | 108.2(3) |
| C3   | C1   | B1   | 119.4(3) | C2   | B4   | B8   | 104.9(3) | C1   | B1   | B6   | 105.4(3)  | B4   | B8   | B9   | 60.0(3)  |
| C3   | C1   | B2   | 124.9(2) | C2   | B4   | B9   | 59.0(3)  | C2   | B1   | C1   | 57.2(2)   | B4   | B8   | B10  | 107.7(3) |
| C3   | C1   | B3   | 120.9(3) | B8   | B4   | B3   | 60.6(3)  | C2   | B1   | B2   | 104.2(3)  | B7   | B8   | B3   | 60.1(2)  |
| C3   | C1   | B4   | 114.1(3) | B8   | B4   | B9   | 60.3(3)  | C2   | B1   | B5   | 58.4(2)   | B7   | B8   | B10  | 59.8(3)  |
| B1   | C1   | B4   | 113.2(3) | B9   | B4   | B3   | 108.4(3) | C2   | B1   | B6   | 104.3(3)  | B9   | B8   | B3   | 107.8(3) |
| B2   | C1   | B1   | 62.1(2)  | C2   | B5   | B1   | 58.7(2)  | B2   | B1   | B5   | 107.9(3)  | B9   | B8   | B7   | 107.5(3) |
| B2   | C1   | B4   | 113.1(3) | C2   | B5   | B6   | 104.3(3) | B6   | B1   | B2   | 60.3(2)   | B9   | B8   | B10  | 59.5(3)  |
| B3   | C1   | B1   | 113.7(3) | C2   | B5   | B9   | 58.7(3)  | B6   | B1   | B5   | 59.9(2)   | C2   | B9   | B4   | 59.0(2)  |
| B3   | C1   | B2   | 62.6(2)  | C2   | B5   | B10  | 104.6(3) | C1   | B2   | B1   | 59.1(2)   | C2   | B9   | B5   | 58.4(3)  |
| B3   | C1   | B4   | 61.7(2)  | B6   | B5   | B1   | 59.7(2)  | C1   | B2   | B3   | 58.4(2)   | C2   | B9   | B8   | 104.4(3) |
| C1   | C2   | B1   | 61.7(2)  | B6   | B5   | B9   | 108.0(3) | C1   | B2   | B6   | 105.3(3)  | C2   | B9   | B10  | 104.1(3) |
| C1   | C2   | B4   | 62.5(2)  | B9   | B5   | B1   | 108.1(3) | C1   | B2   | B7   | 105.0(3)  | B4   | B9   | B5   | 108.4(3) |
| C1   | C2   | B5   | 112.4(3) | B10  | B5   | B1   | 108.0(3) | B1   | B2   | B3   | 107.8(3)  | B4   | B9   | B8   | 59.6(3)  |
| C1   | C2   | B9   | 112.2(3) | B10  | B5   | B6   | 60.2(3)  | B1   | B2   | B6   | 59.8(2)   | B4   | B9   | B10  | 108.5(4) |
| B1   | C2   | B4   | 115.3(3) | B10  | B5   | B9   | 59.9(3)  | B3   | B2   | B6   | 108.4(3)  | B8   | B9   | B5   | 108.5(4) |
| B1   | C2   | B9   | 115.0(3) | B1   | B6   | B2   | 60.0(2)  | B7   | B2   | B1   | 108.0(3)  | B8   | B9   | B10  | 61.0(3)  |
| B5   | C2   | B1   | 62.9(3)  | B1   | B6   | B5   | 60.4(2)  | B7   | B2   | B3   | 60.1(2)   | B10  | B9   | B5   | 59.6(3)  |
| B5   | C2   | B4   | 114.6(3) | B1   | B6   | B7   | 107.6(3) | B7   | B2   | B6   | 60.3(2)   | B5   | B10  | B6   | 60.1(3)  |
| B5   | C2   | B9   | 62.9(3)  | B1   | B6   | B10  | 108.2(3) | C1   | B3   | B2   | 59.0(2)   | B5   | B10  | B7   | 108.0(3) |
| B9   | C2   | B4   | 62.0(3)  | B2   | B6   | B7   | 59.6(2)  | C1   | B3   | B4   | 60.1(2)   | B5   | B10  | B8   | 108.0(3) |
| O1   | C3   | C1   | 110.7(3) | B5   | B6   | B2   | 108.1(3) | C1   | B3   | B7   | 105.1(3)  | B5   | B10  | B9   | 60.5(3)  |
| O1   | C3   | C4   | 109.6(2) | B5   | B6   | B7   | 107.4(3) | C1   | B3   | B8   | 105.9(3)  | B6   | B10  | B7   | 60.2(3)  |
| C1   | C3   | C4   | 112.8(2) | B5   | B6   | B10  | 59.6(3)  | B2   | B3   | B7   | 59.8(2)   | B6   | B10  | B8   | 108.0(3) |
| O2   | C4   | C3   | 104.5(3) | B10  | B6   | B2   | 107.9(3) | B4   | B3   | B2   | 108.8(3)  | B7   | B10  | B8   | 59.5(3)  |
| O2   | C4   | C5   | 112.5(3) | B10  | B6   | B7   | 60.0(3)  | B4   | B3   | B7   | 107.4(3)  | B9   | B10  | B6   | 108.4(3) |
| C5   | C4   | C3   | 111.7(3) | B2   | B7   | B3   | 60.1(2)  | B4   | B3   | B8   | 59.4(3)   | B9   | B10  | B7   | 107.2(3) |
| C6   | C5   | C4   | 121.6(3) | B2   | B7   | B6   | 60.0(2)  | B8   | B3   | B2   | 108.1(3)  | B9   | B10  | B8   | 59.5(3)  |
| C10  | C5   | C4   | 119.7(3) | B2   | B7   | B8   | 108.5(3) |      |      |      |           |      |      |      |          |
| C10  | C5   | C6   | 118.8(3) | B2   | B7   | B10  | 108.1(3) |      |      |      |           |      |      |      |          |
| C7   | C6   | C5   | 120.9(3) | B3   | B7   | B6   | 108.0(3) |      |      |      |           |      |      |      |          |
| C8   | C7   | C6   | 119.3(3) | B3   | B7   | B10  | 108.4(3) |      |      |      |           |      |      |      |          |
| C7   | C8   | C11  | 119.2(3) | B8   | B7   | B3   | 60.0(3)  |      |      |      |           |      |      |      |          |
| C7   | C8   | C9   | 121.6(3) | B8   | B7   | B6   | 108.6(3) |      |      |      |           |      |      |      |          |

## 6. Comparison of NMR data of 2a and 1,2-diphenylethane-1,2-diol.

The chemical shift data of  $^1\text{H}$  NMR and  $^{13}\text{C}$  NMR of **2a** and diphenylethylene glycol<sup>[3]</sup> are shown below for comparison with different structural characterization. The results shows that obvious difference between the carborane and benzene ring moiety.

<sup>[3]</sup>E. N. Jacobsen, I. Markó, W. S. Mungall, G. Schröder and K. B. Sharpless, *J. Am. Chem. Soc.*, 1988, **110**, 1968–1970.

| compounds                                                                         | $^1\text{H}$ NMR chemical shift (ppm) |                          | $^{13}\text{C}$ NMR chemical shift (ppm) |
|-----------------------------------------------------------------------------------|---------------------------------------|--------------------------|------------------------------------------|
|                                                                                   | $\text{H}_a, \text{H}_b$              | $\text{H}_c, \text{H}_d$ | $\text{CH}(\text{OH})$                   |
| 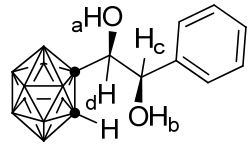 | 3.28, 2.34                            | 4.99, 4.17               | 77.6, 75.5                               |
|  | 2.88                                  | 4.73                     | 79.1                                     |



LHN-4-36 <sup>1</sup>H NMR in CDCl<sub>3</sub> 300M

7.3395  
7.3113  
7.2843  
7.2596  
6.8345  
6.77821  
6.2784  
6.2280

3.77167

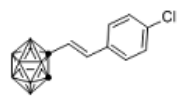

1c

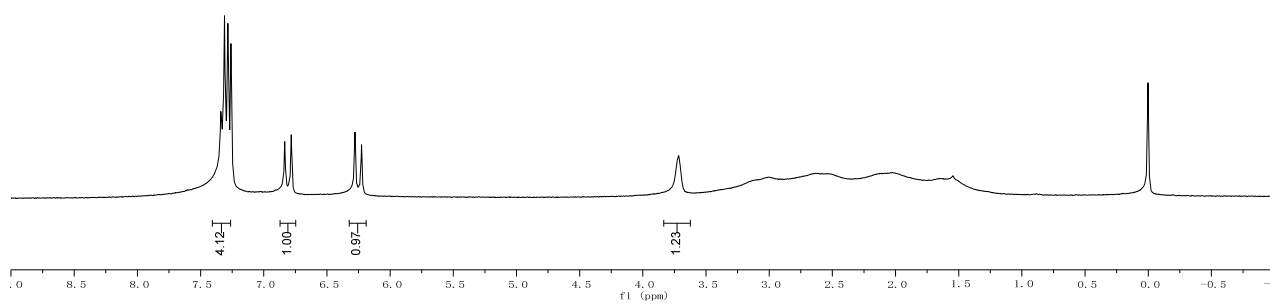

LHN-4-36 <sup>13</sup>C NMR in CDCl<sub>3</sub> 75M

136.4467  
132.5593  
132.5546  
128.1327  
128.1369  
123.0633

77.4392  
77.0157  
76.8924  
73.7693

60.8244

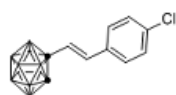

1c

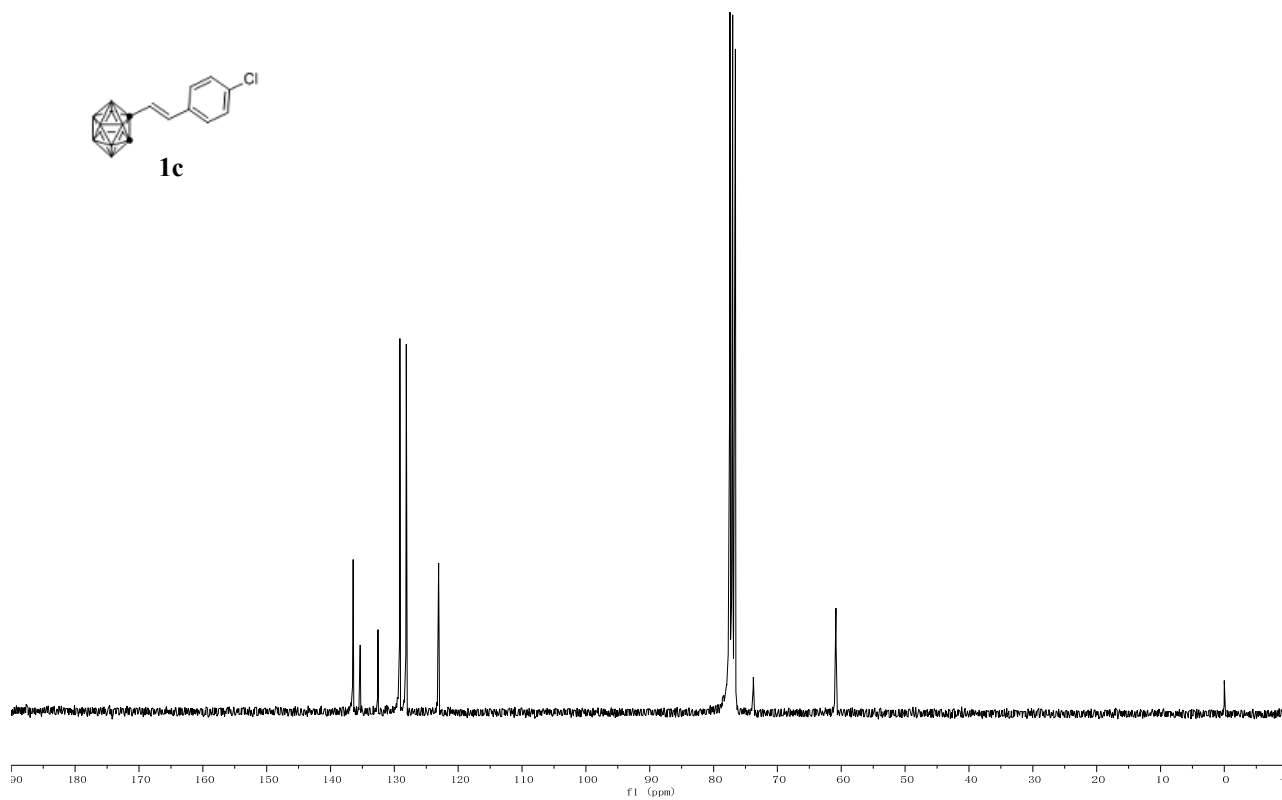

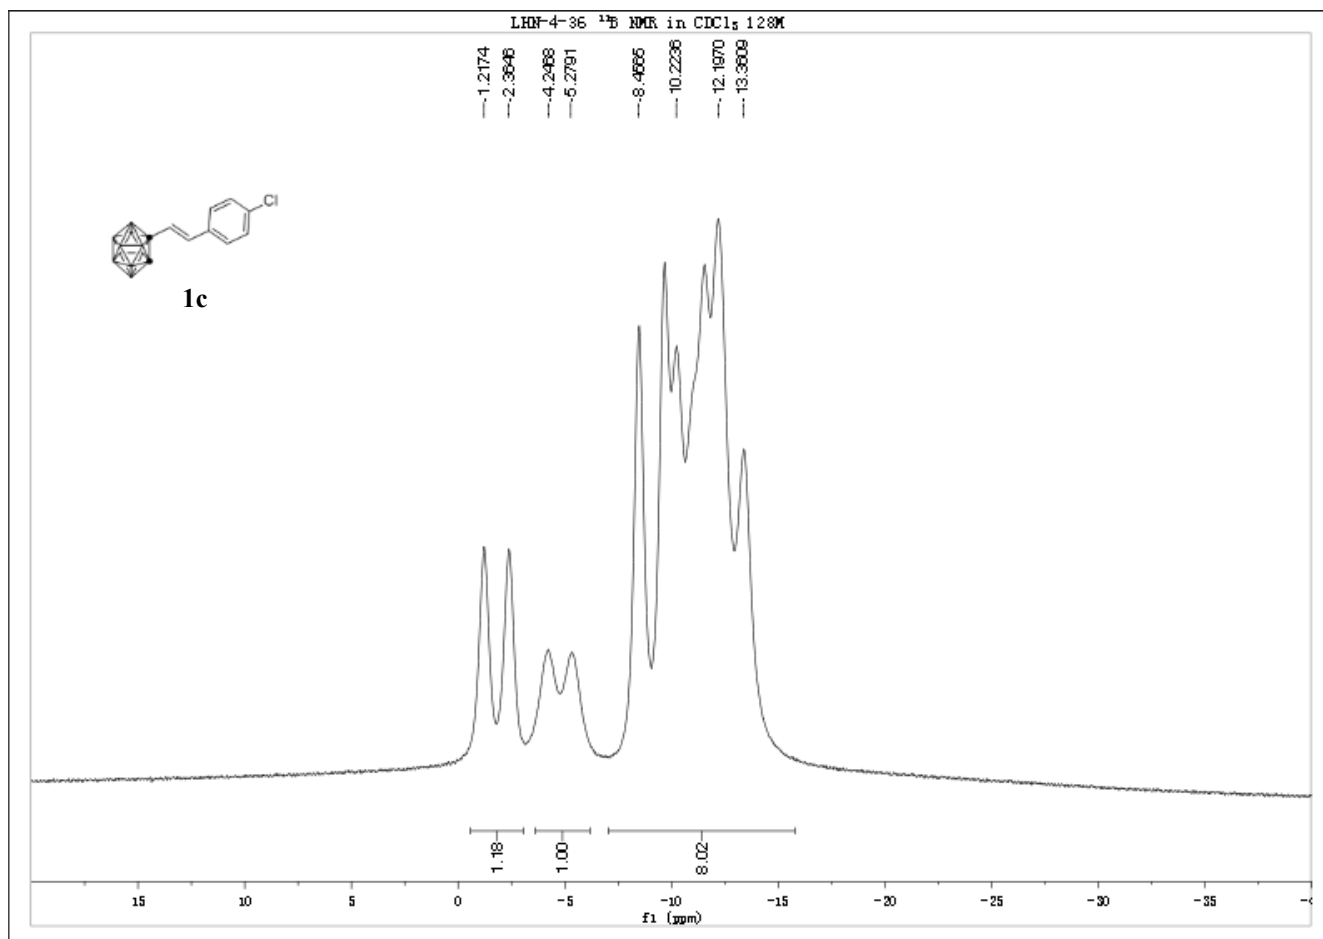

LHN-4-36. HRMS (ESI)  $m/z$  calcd for  $\text{C}_{10}\text{H}_{16}\text{B}_{10}\text{Cl}^-$  (M-H) 280.19129, found 280.19263.

LHN-4-29 #10 RT: 0.11 AV: 1 NL: 1.15E7  
T: FTMS - p ESI Full ms [50.0000-750.0000]

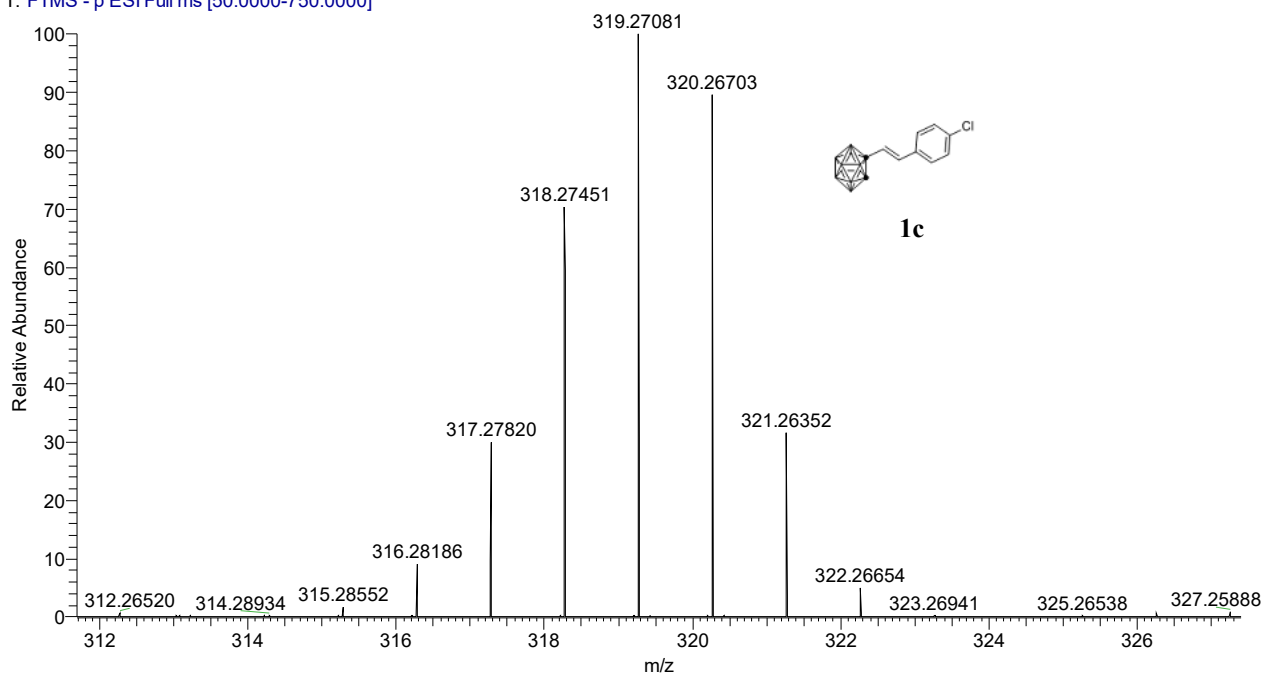

LHN-4-32 1H NMR in CDCl<sub>3</sub> 300M

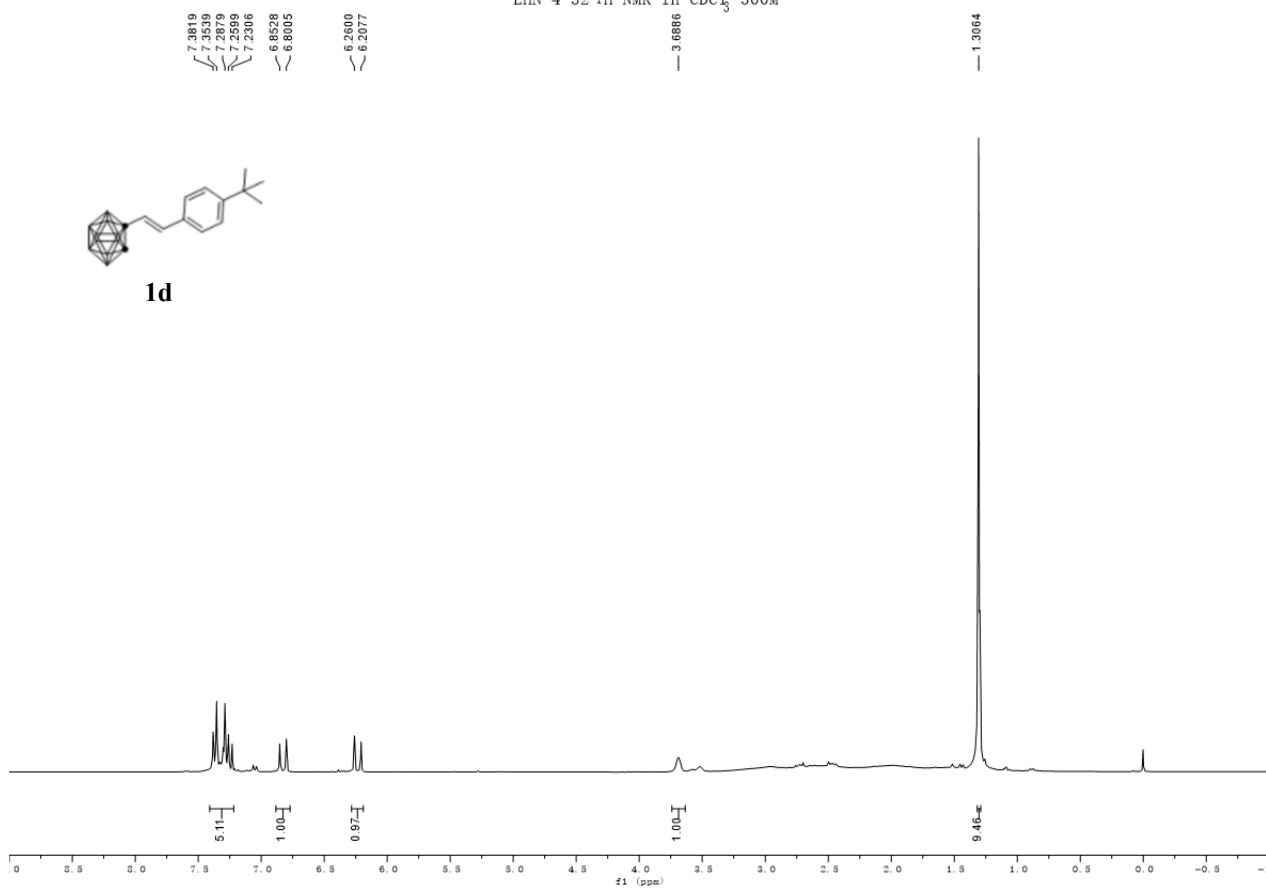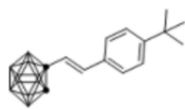

1d

LHN-4-32 13C NMR in CDCl<sub>3</sub> 75M

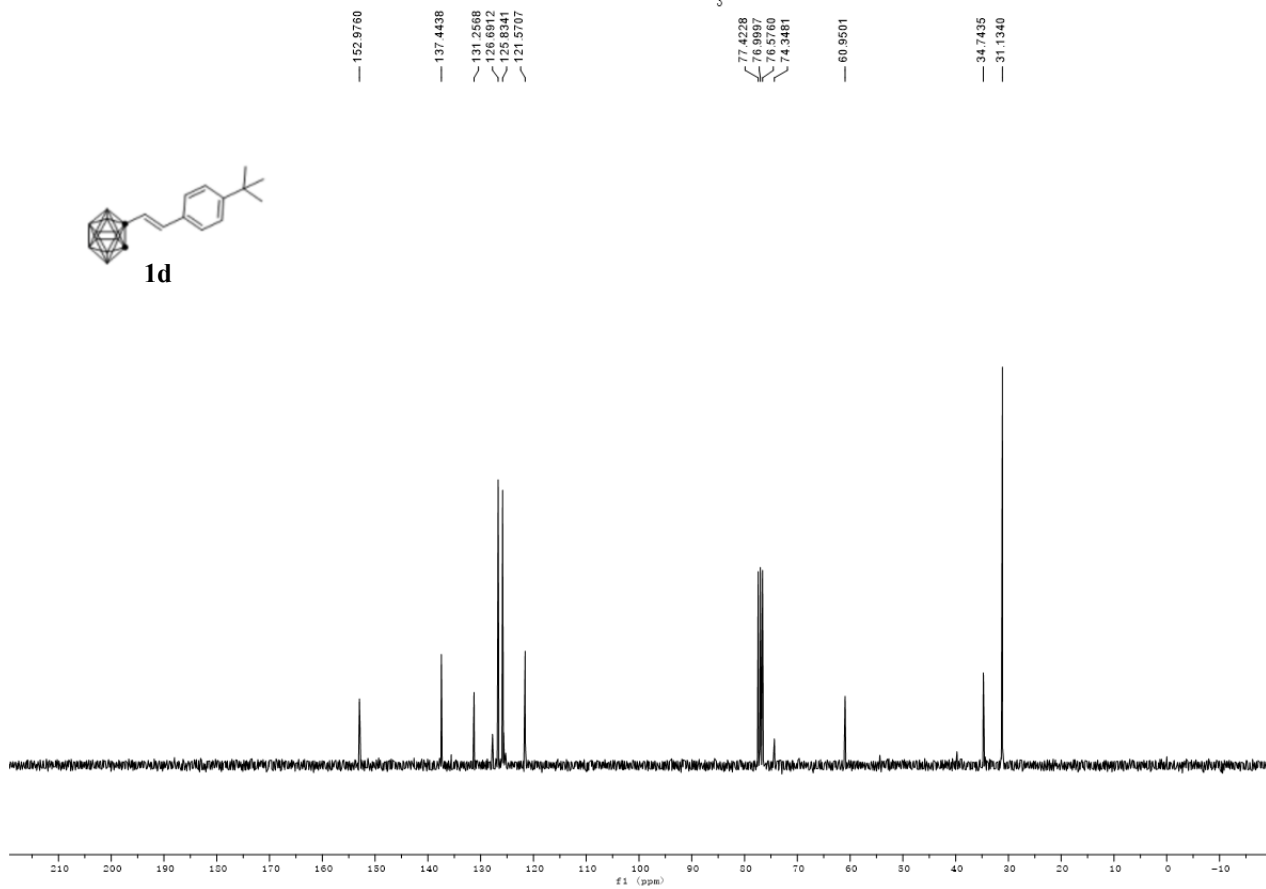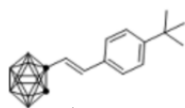

1d

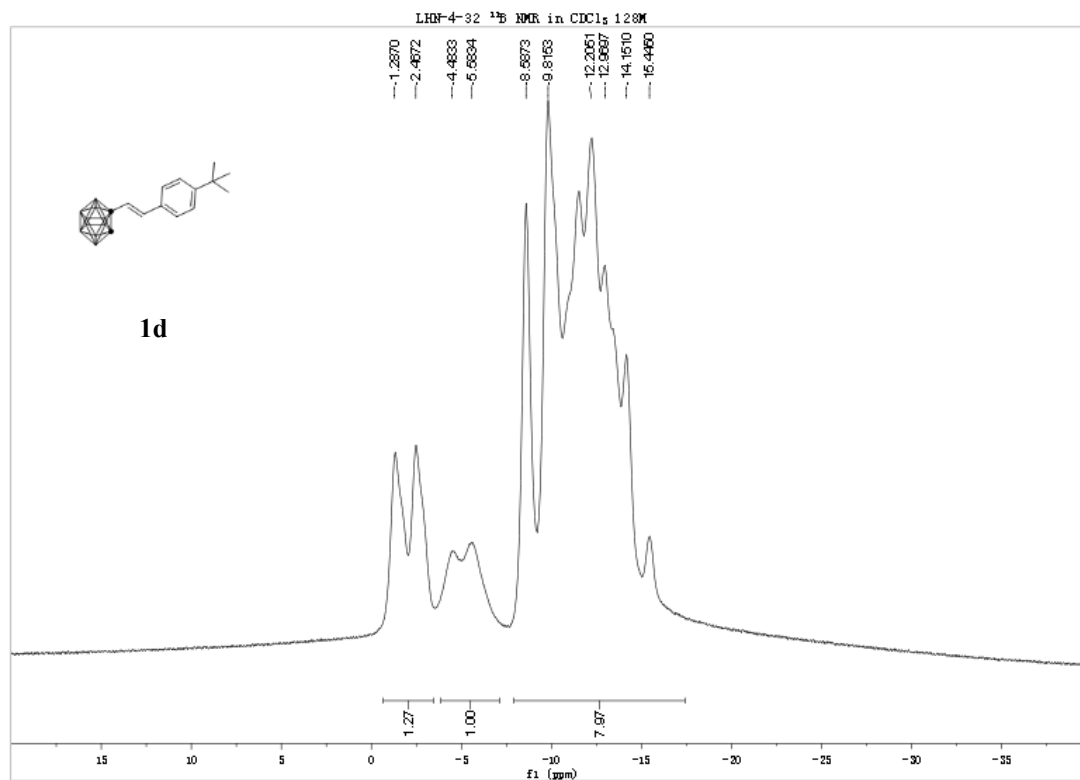

LHN-4-32. HRMS (ESI)  $m/z$  calcd for  $C_{14}H_{25}B_{10}^-$  (M-H)<sup>-</sup> 301.29649, found 301.29684.

LHN-4-32 #8 RT: 0.09 AV: 1 NL: 1.40E7  
T: FTMS - p ESI Full ms [50.0000-750.0000]

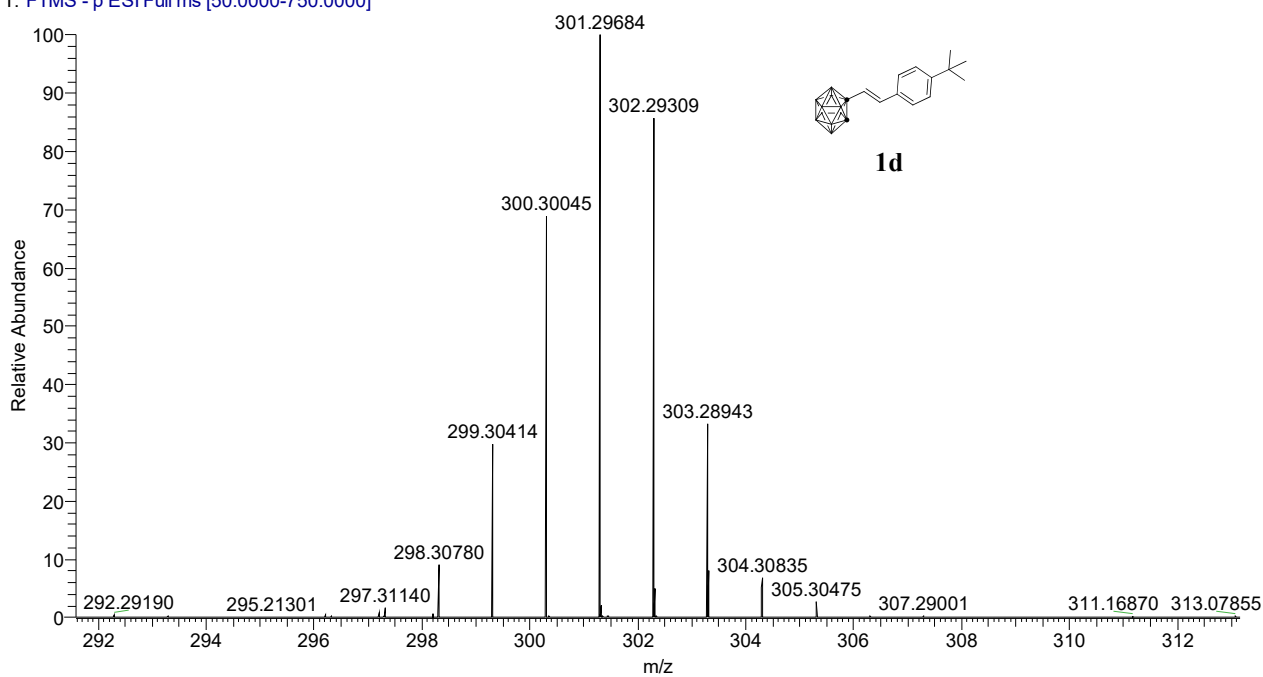

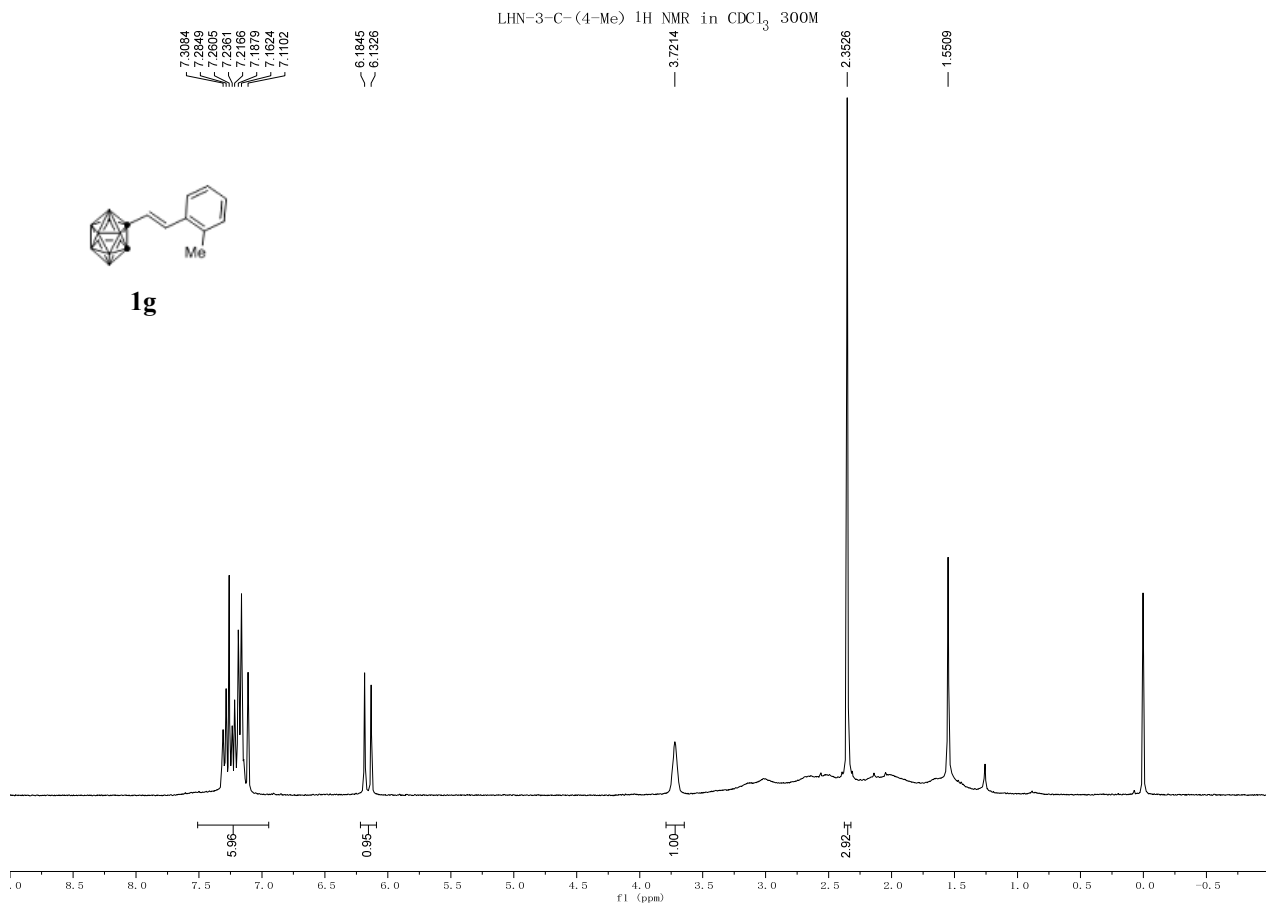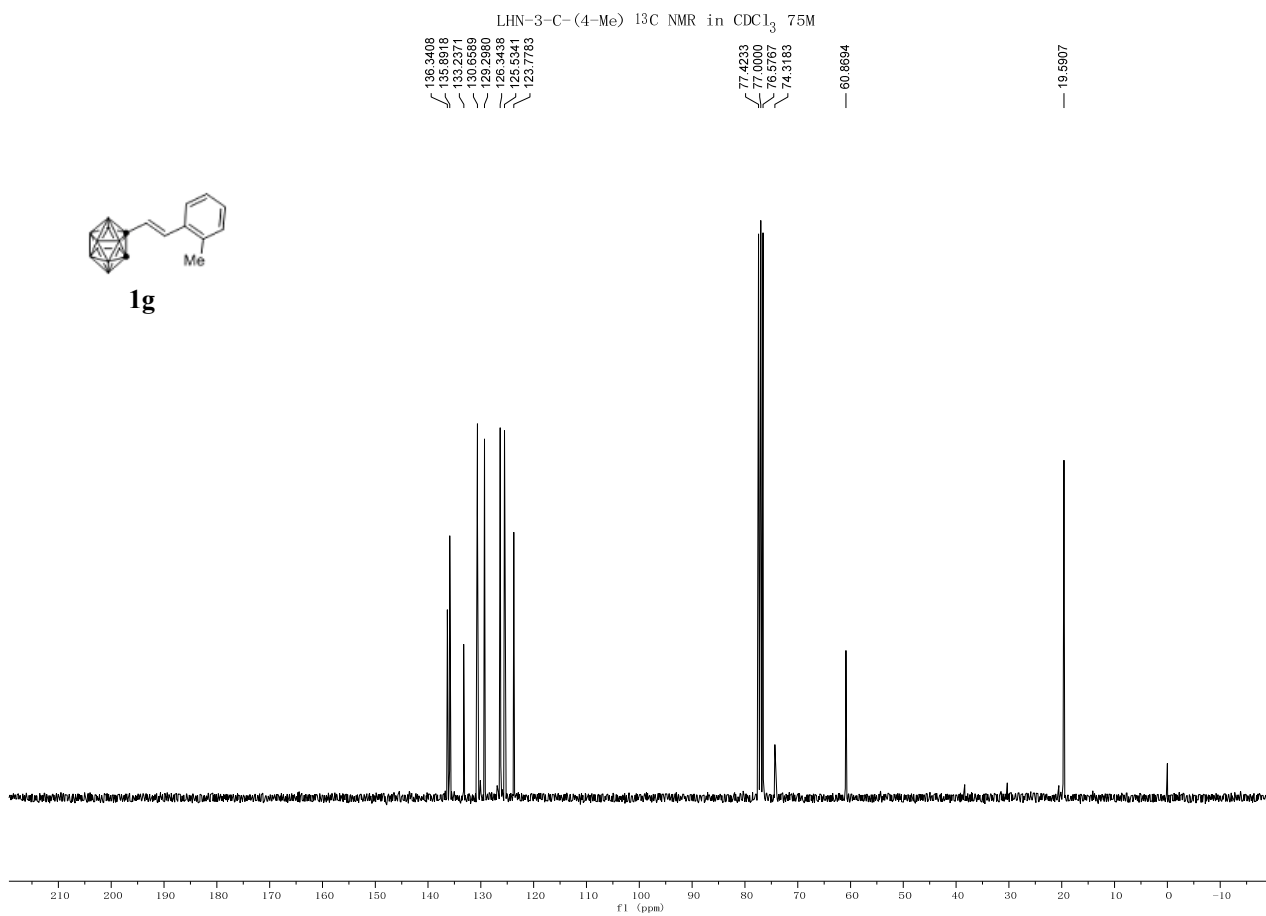

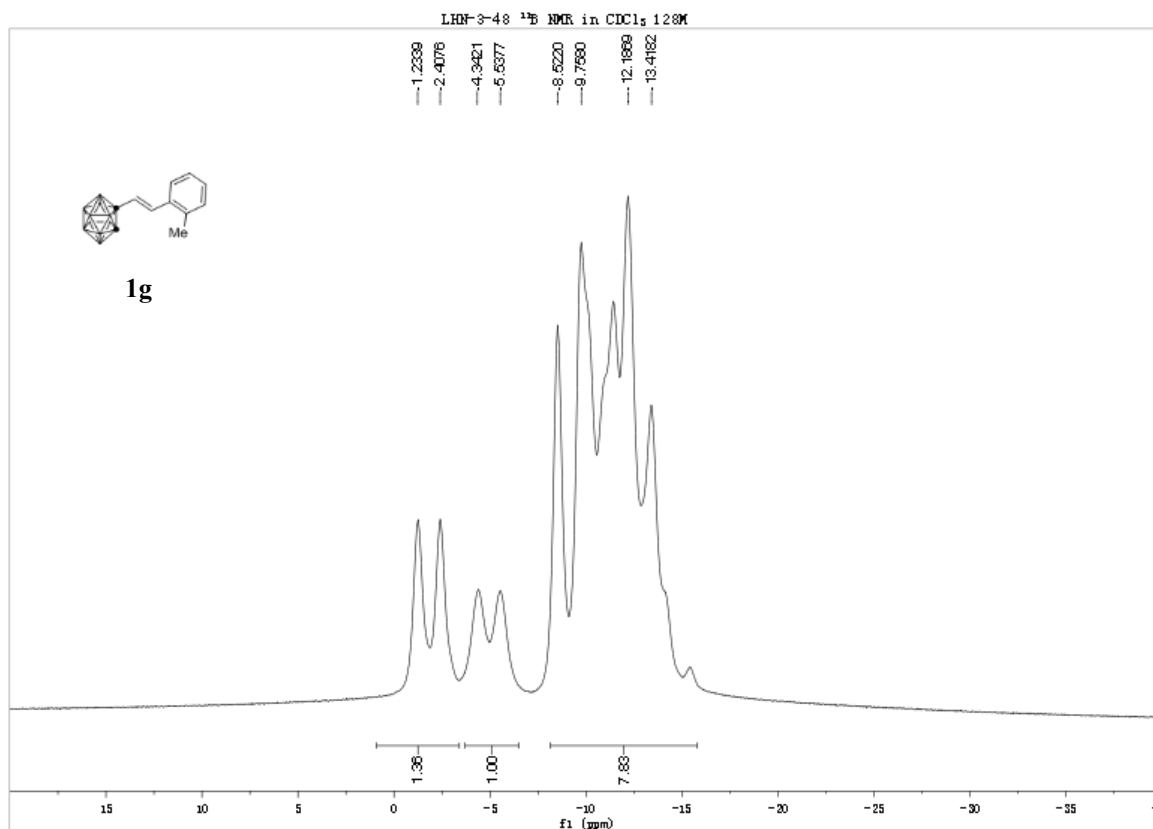

LHN-3-48. HRMS (ESI) m/z calcd for C<sub>11</sub>H<sub>19</sub>B<sub>10</sub><sup>-</sup> (M-H)<sup>-</sup> 260.24591, found 260.24615.

LHN-3-48 #8 RT: 0.09 AV: 1 NL: 2.95E7  
T: FTMS - p ESI Full ms [50.0000-750.0000]

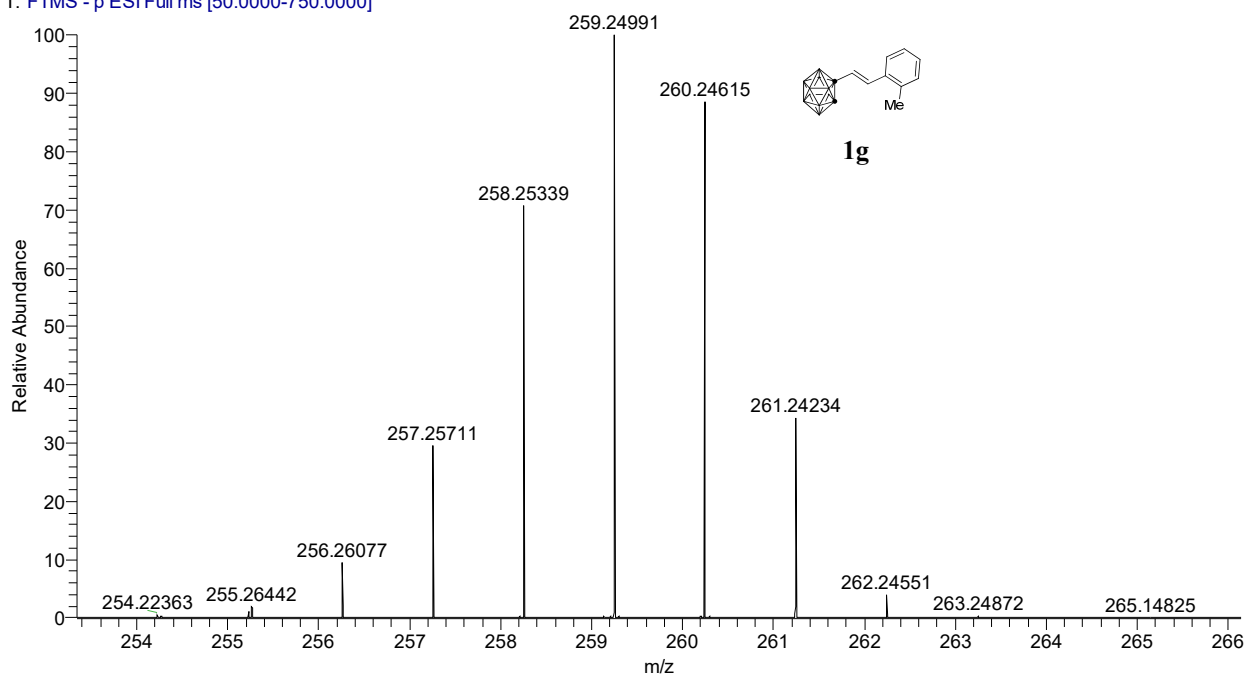



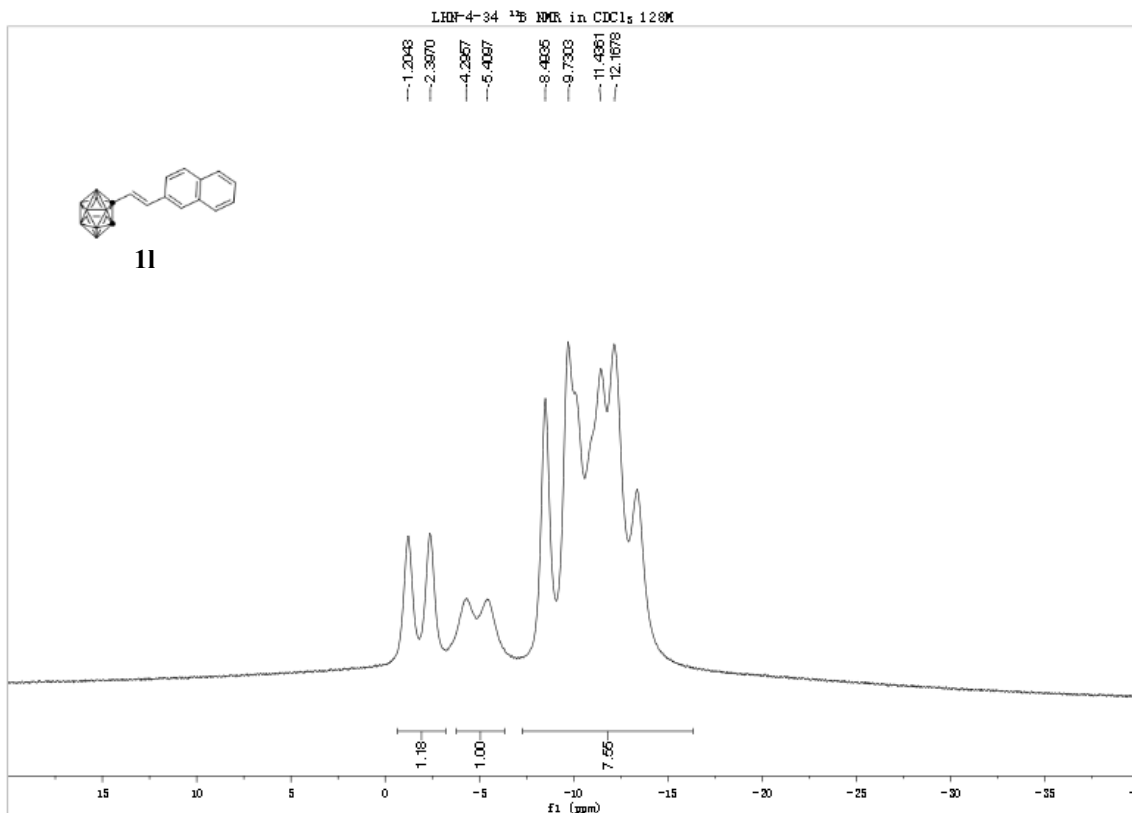

LHN-4-34. HRMS (ESI)  $m/z$  calcd for  $\text{C}_{14}\text{H}_{19}\text{B}_{10}^-$  (M-H) $^-$  296.24591, found 296.24622.

LHN-4-34 #8 RT: 0.09 AV: 1 NL: 1.96E7  
T: FTMS - p ESI Full ms [50.0000-750.0000]

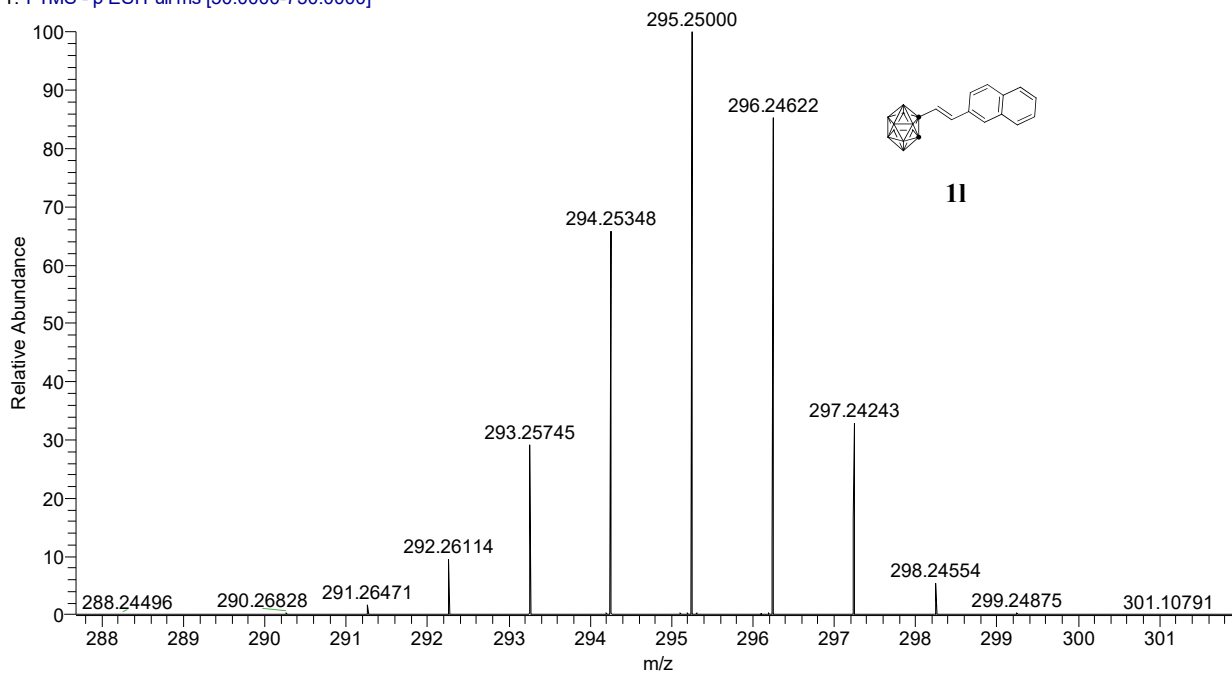



7.4279  
7.4196  
7.3899  
7.3740  
7.3488  
7.3228  
7.2605

LHN-2-59A 1H NMR in CDCl<sub>3</sub> 300M

4.9998  
4.8673

4.1869  
4.1584  
4.0862

3.2986  
3.2680

2.3510  
2.3366

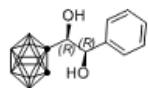

2a

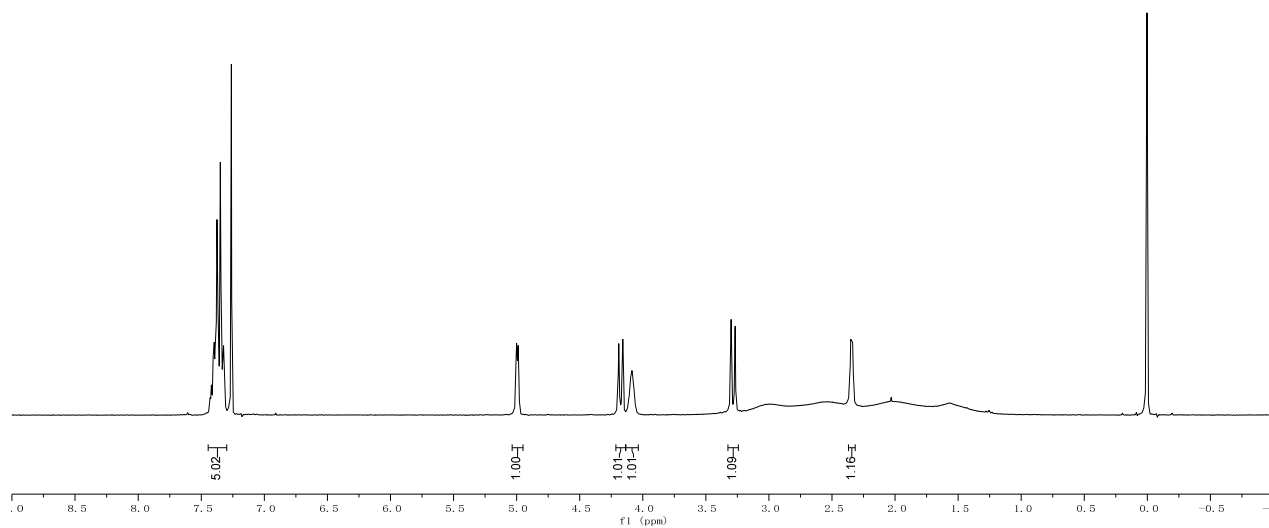

LHN-2-59A 13C NMR in CDCl<sub>3</sub> 75M

140.1676

128.8702  
128.8500  
125.8459

77.6414  
77.4475  
77.0242  
76.6010  
73.8508  
73.0292

58.0830

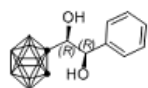

2a

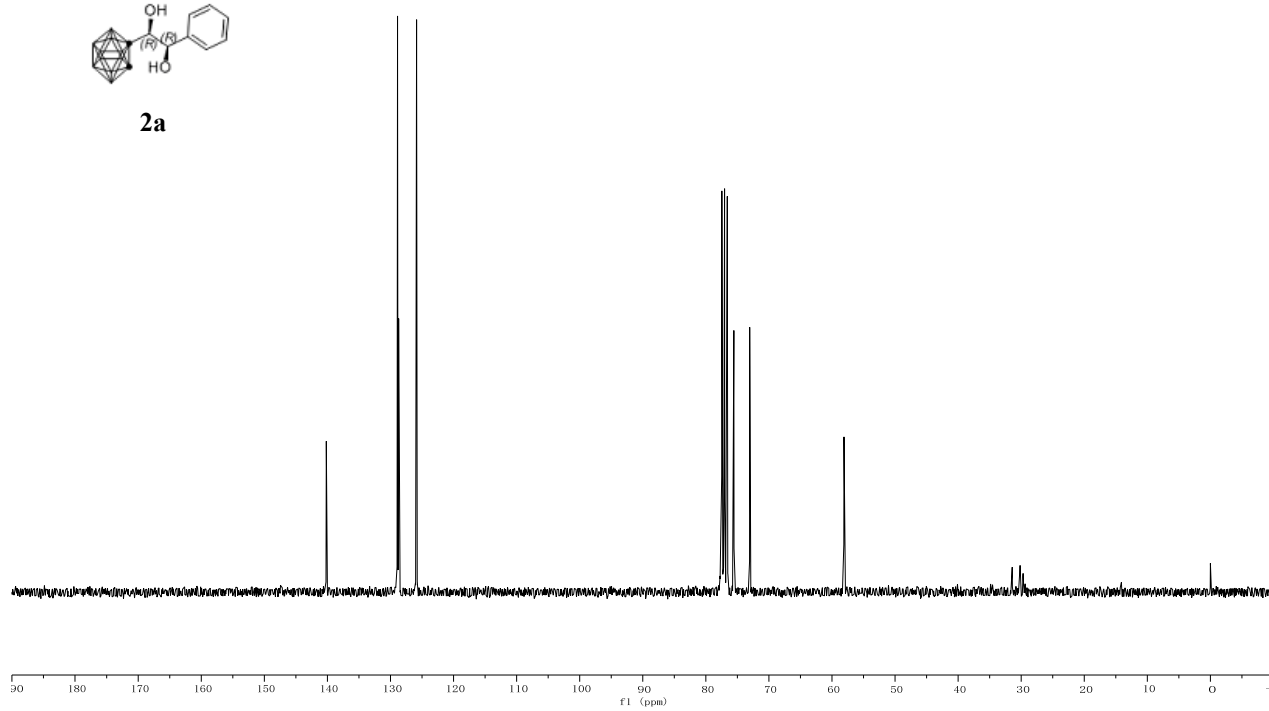

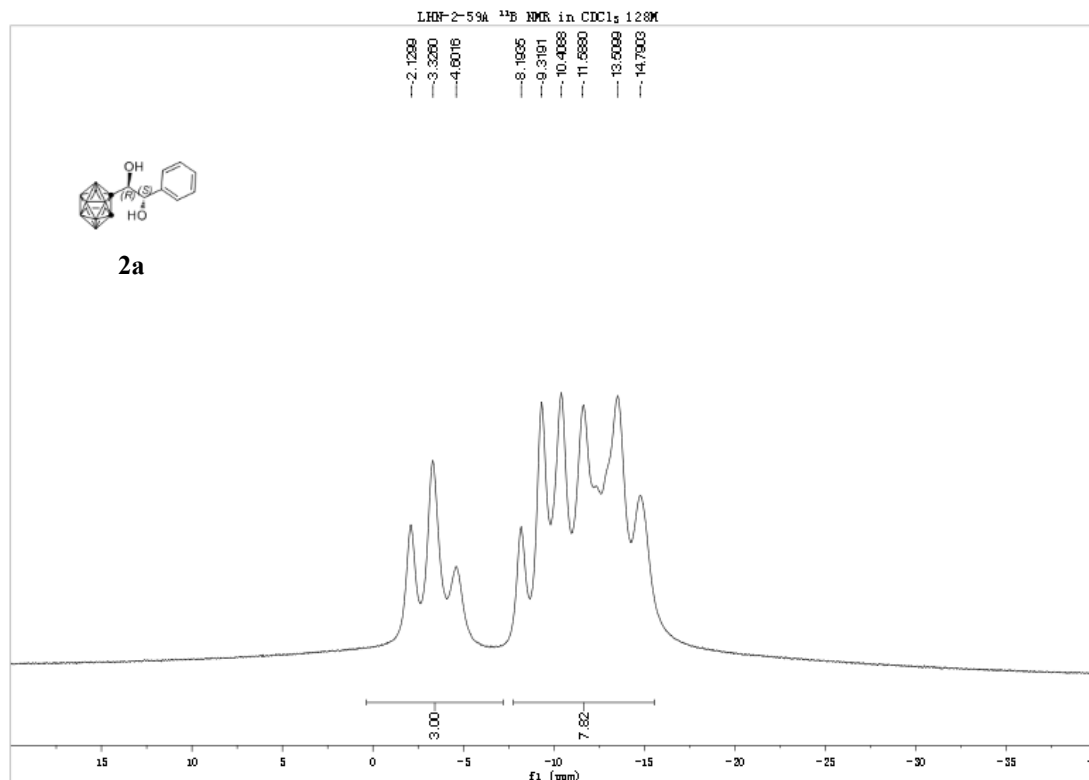

LHN-2-59A. HRMS (ESI)  $m/z$  calcd for  $C_{10}H_{19}B_{10}O_2^-$  (M-H)<sup>-</sup> 280.23574, found 280.23581.

LHN-2-59A #8 RT: 0.09 AV: 1 NL: 1.68E6  
T: FTMS - p ESI Full ms [50.0000-750.0000]

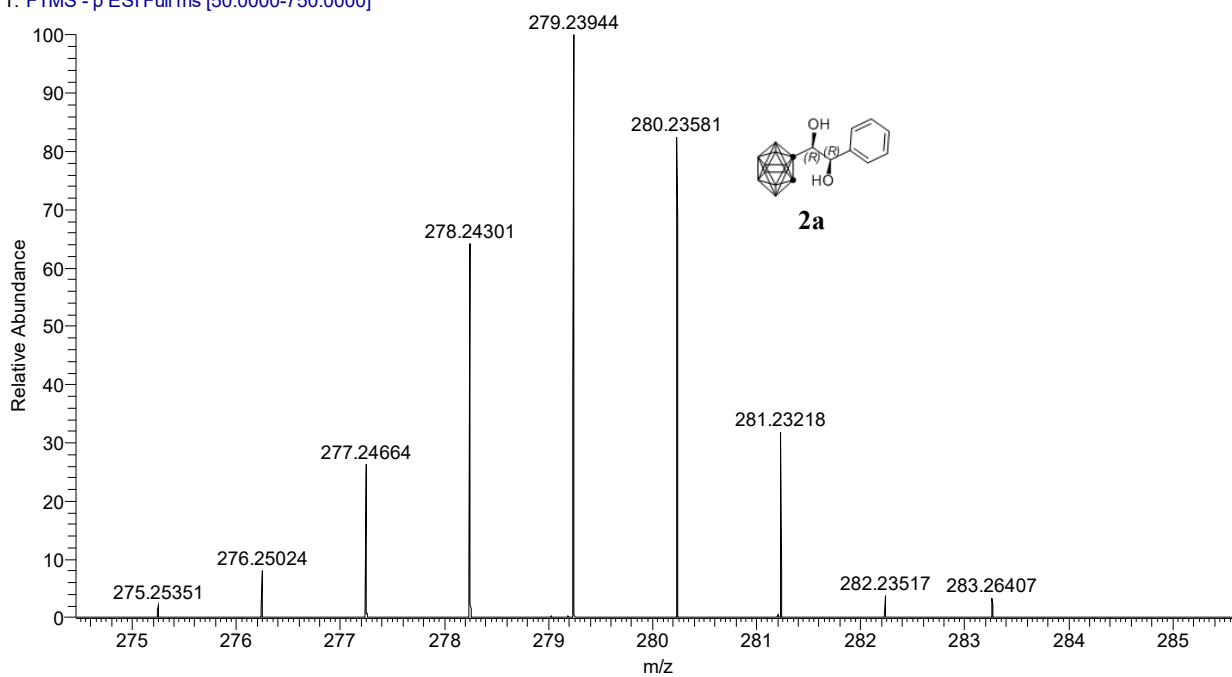

LHN-3-48H 1H NMR in CDCl<sub>3</sub> 300M

7.3398  
7.3320  
7.3114  
7.2937  
7.2696  
7.1996  
7.0721  
7.0434

4.9728

4.1277  
4.0730

3.3387

2.4875

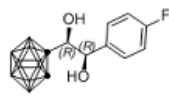

2b

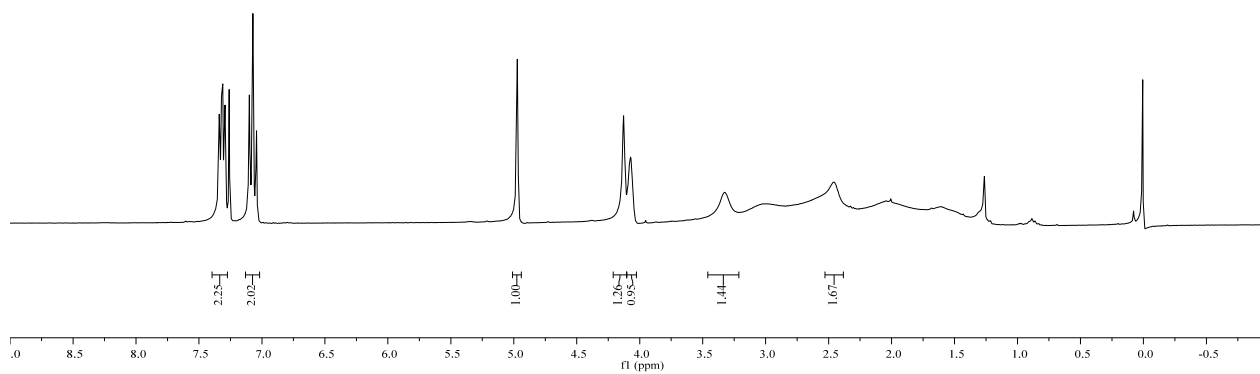

LHN-3-48H <sup>13</sup>C NMR in CDCl<sub>3</sub> 75M

164.3502  
161.0671

135.9224  
135.8798

127.7614  
127.6518

115.9148  
115.6278

77.4233  
76.9995  
76.5762  
75.5213  
74.4014

57.9655

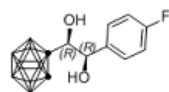

2b

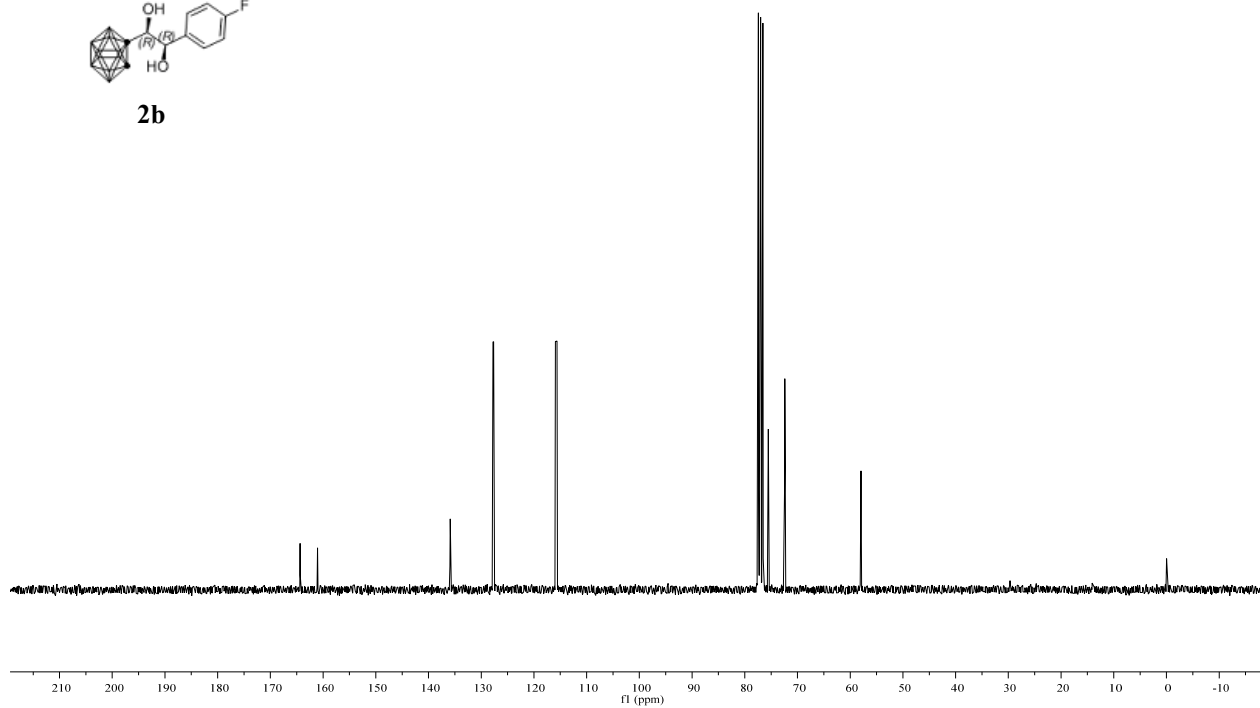

LHN-3-48H 19F NMR in CDCl<sub>3</sub> 376M

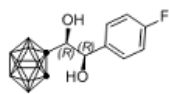

**2b**

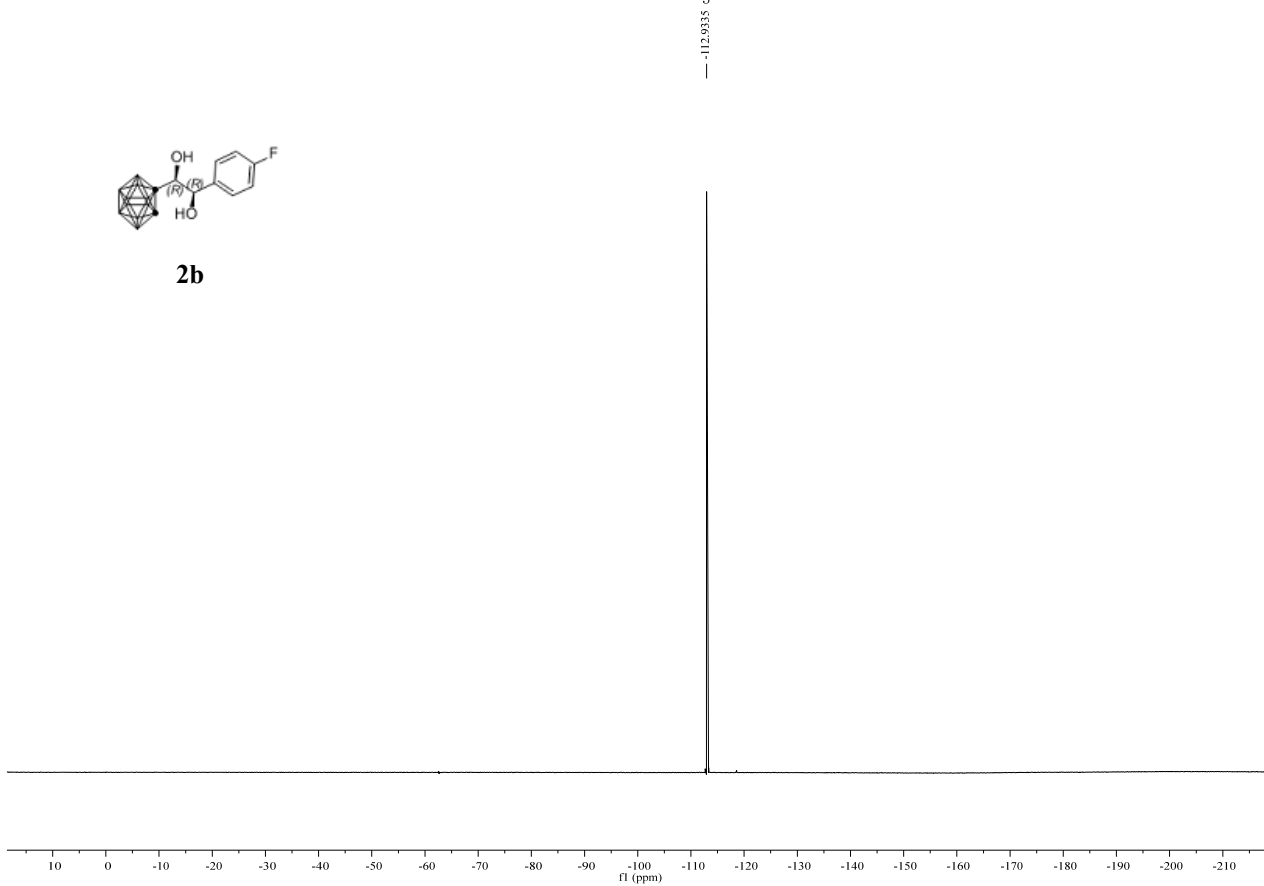

LHN-3-48H <sup>13</sup>C NMR in CDCl<sub>3</sub> 128M

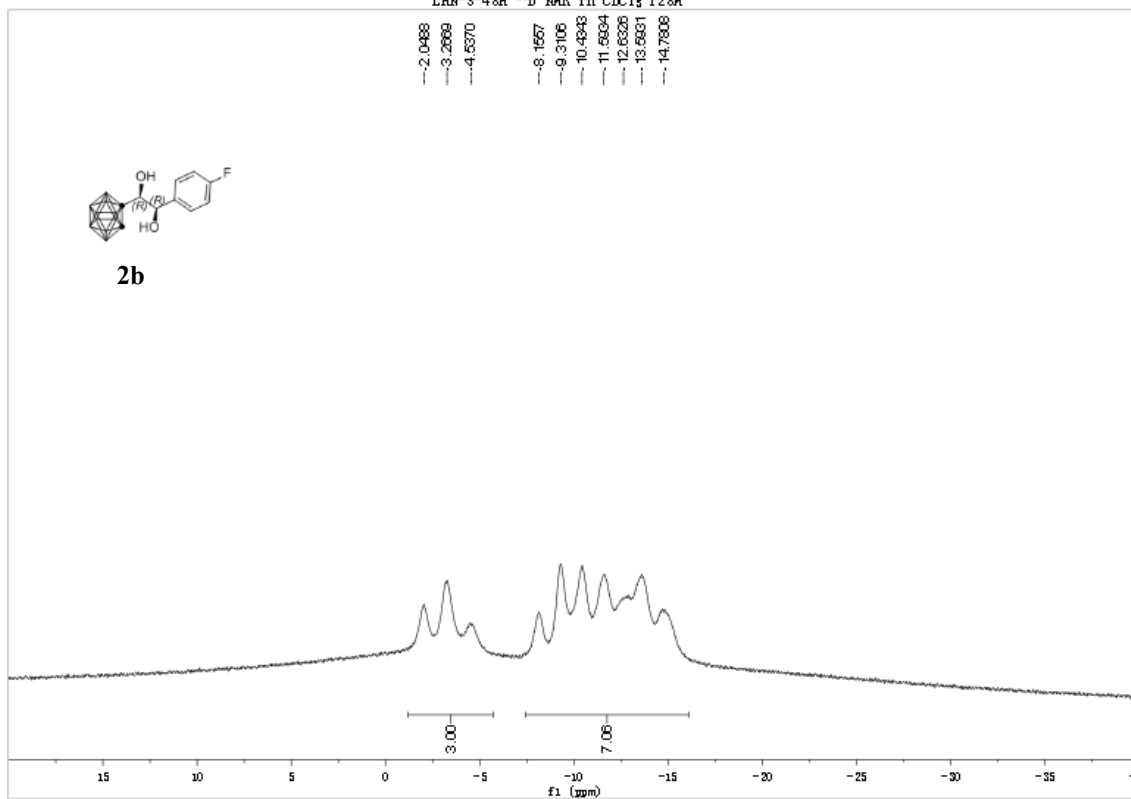

**LHN-3-48H.** HRMS (ESI)  $m/z$  calcd for  $C_{10}H_{18}B_{10}FO_2^-$  (M-H) $^-$  298.22632, found 298.22635.

LHN-3-48H #8 RT: 0.09 AV: 1 NL: 1.57E6  
T: FTMS - p ESI Full ms [50.0000-750.0000]

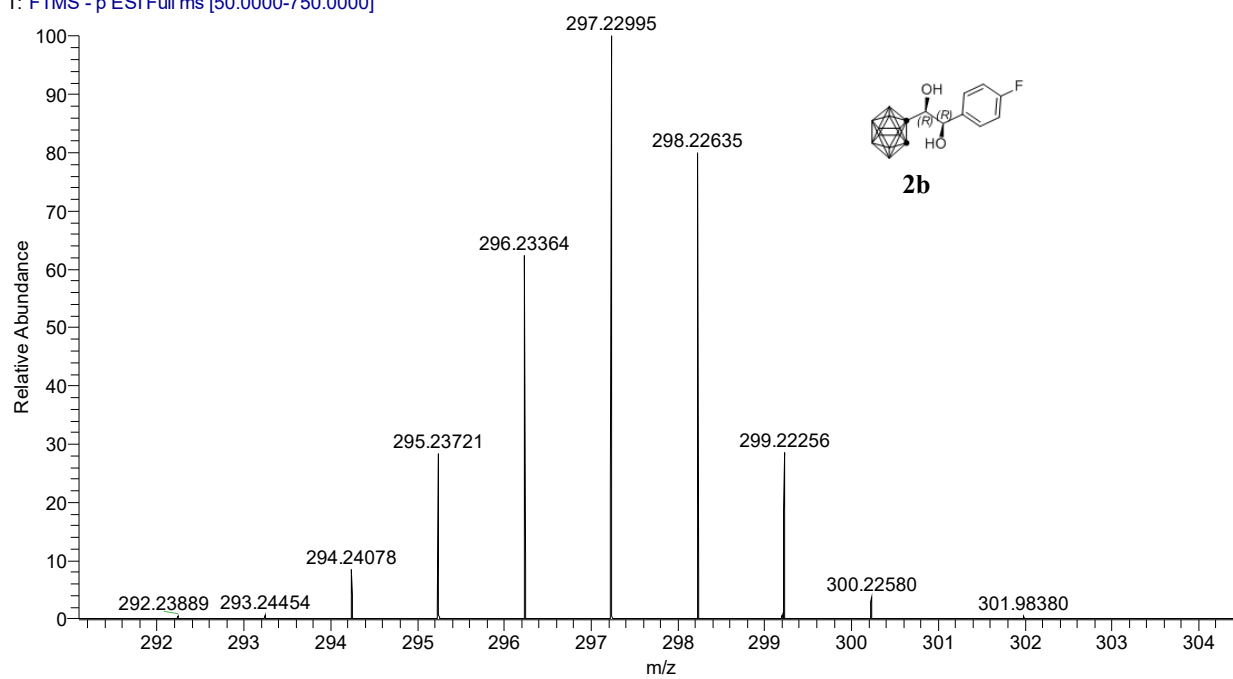

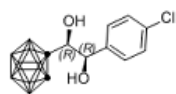

2c

7.3770  
7.3489  
7.2918  
7.2597

LHN-4-44 <sup>1</sup>H NMR in CDCl<sub>3</sub> 300M

4.9923  
4.9782

4.1430  
4.1103  
4.0755

3.2538  
3.2210

2.3693  
2.3537

— 1.5716

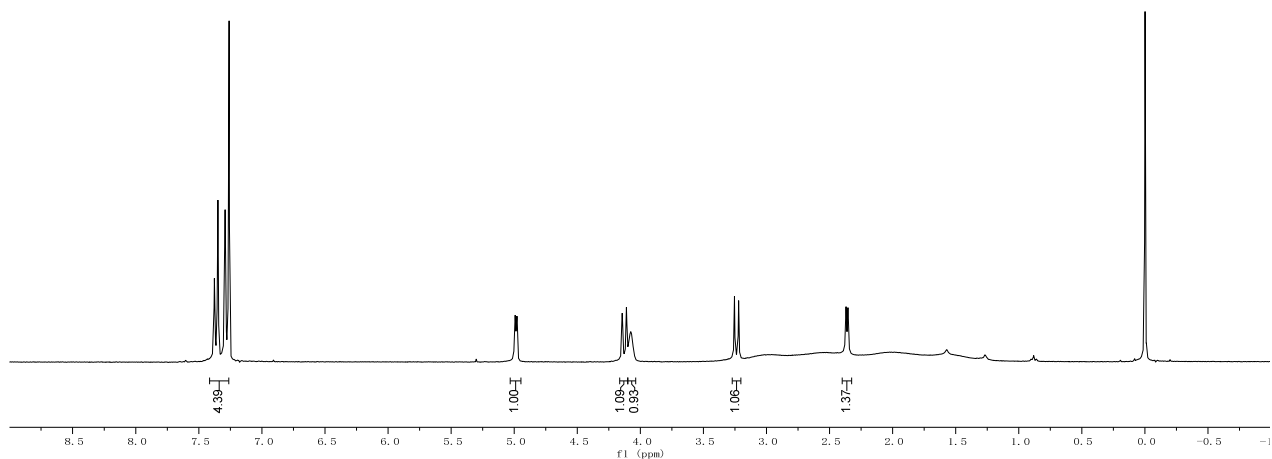

LHN-4-44 <sup>13</sup>C NMR in CDCl<sub>3</sub> 75M

138.5151  
134.5430  
129.0116  
127.2801

77.4356  
77.0124  
76.5891  
75.5018  
72.4042

— 57.9086

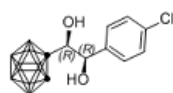

2c

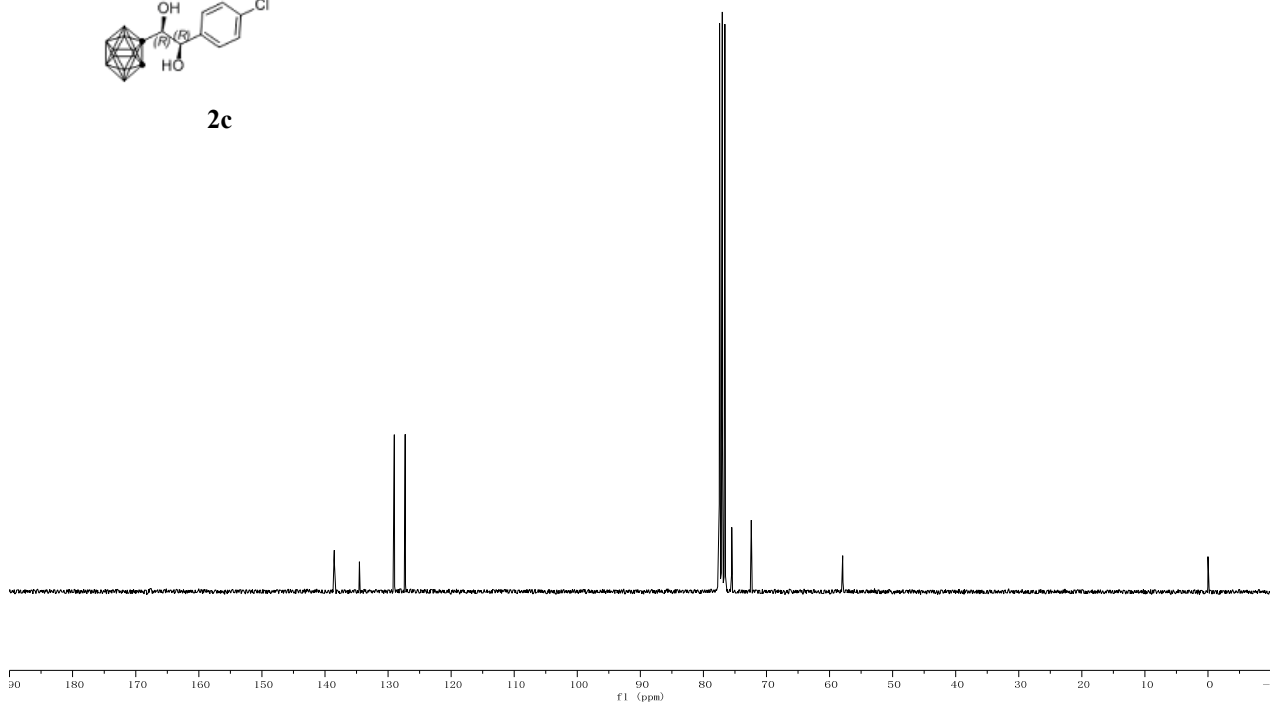

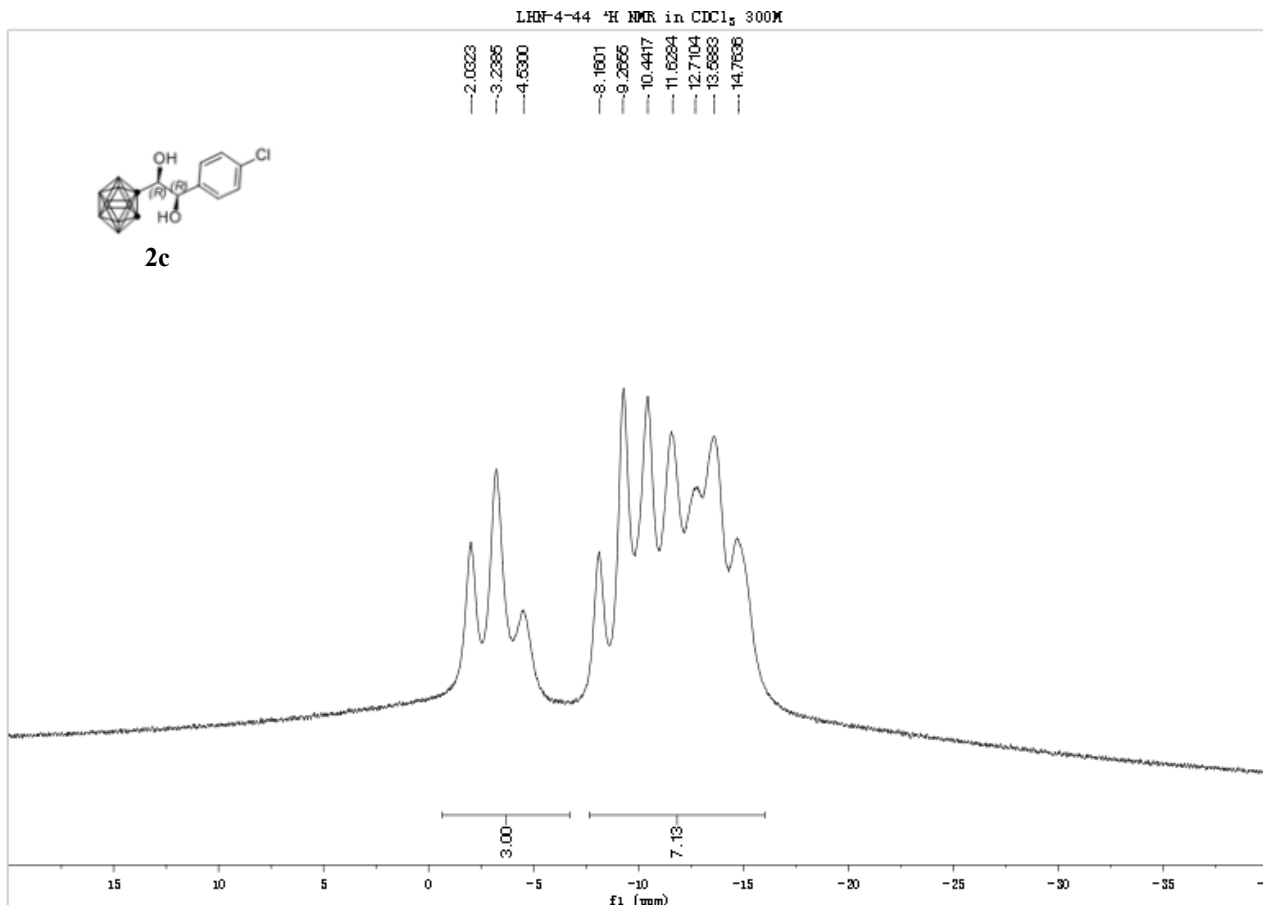

**LHN-4-44.** HRMS (ESI)  $m/z$  calcd for  $\text{C}_{10}\text{H}_{18}\text{B}_{10}\text{ClO}_2^-$  (M-H)<sup>-</sup> 313.20040, found 313.20050.

LHN-4-44 #8 RT: 0.09 AV: 1 NL: 5.86E5  
 T: FTMS - p ESI Full ms [50.0000-750.0000]

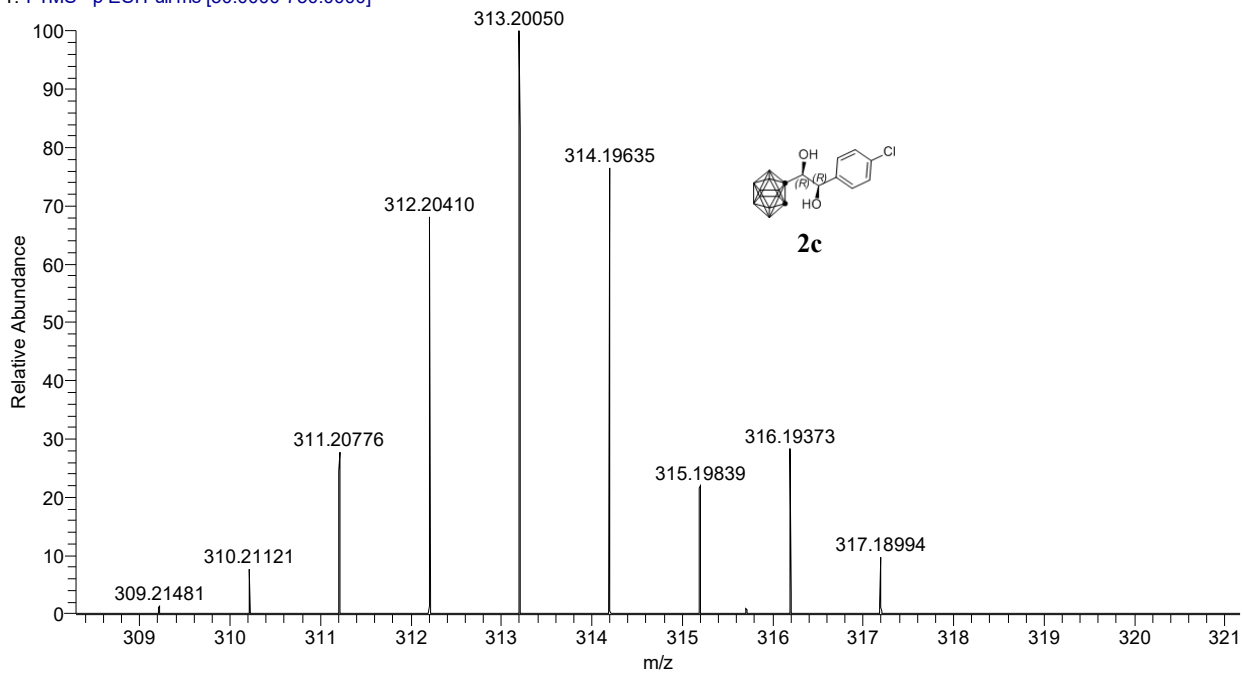

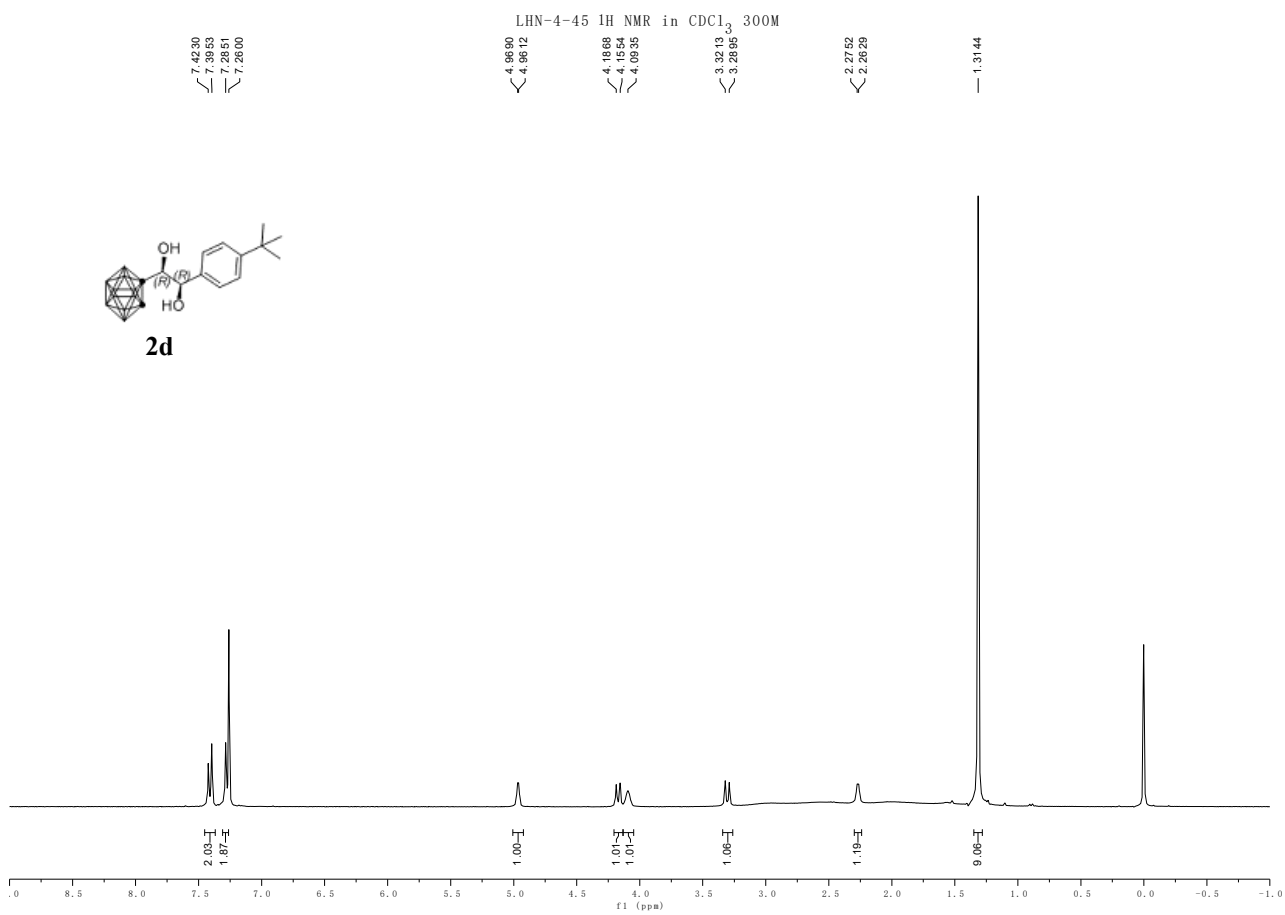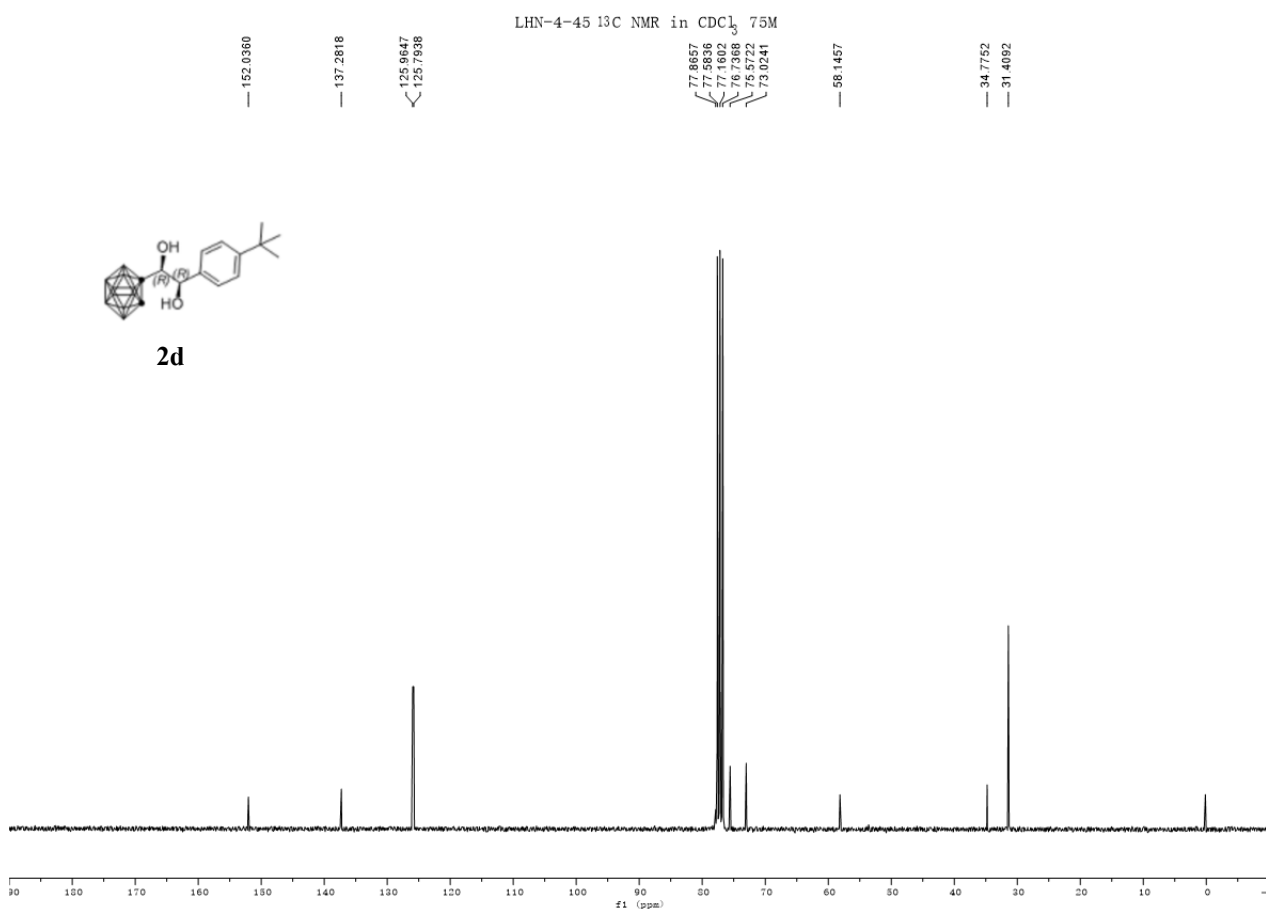



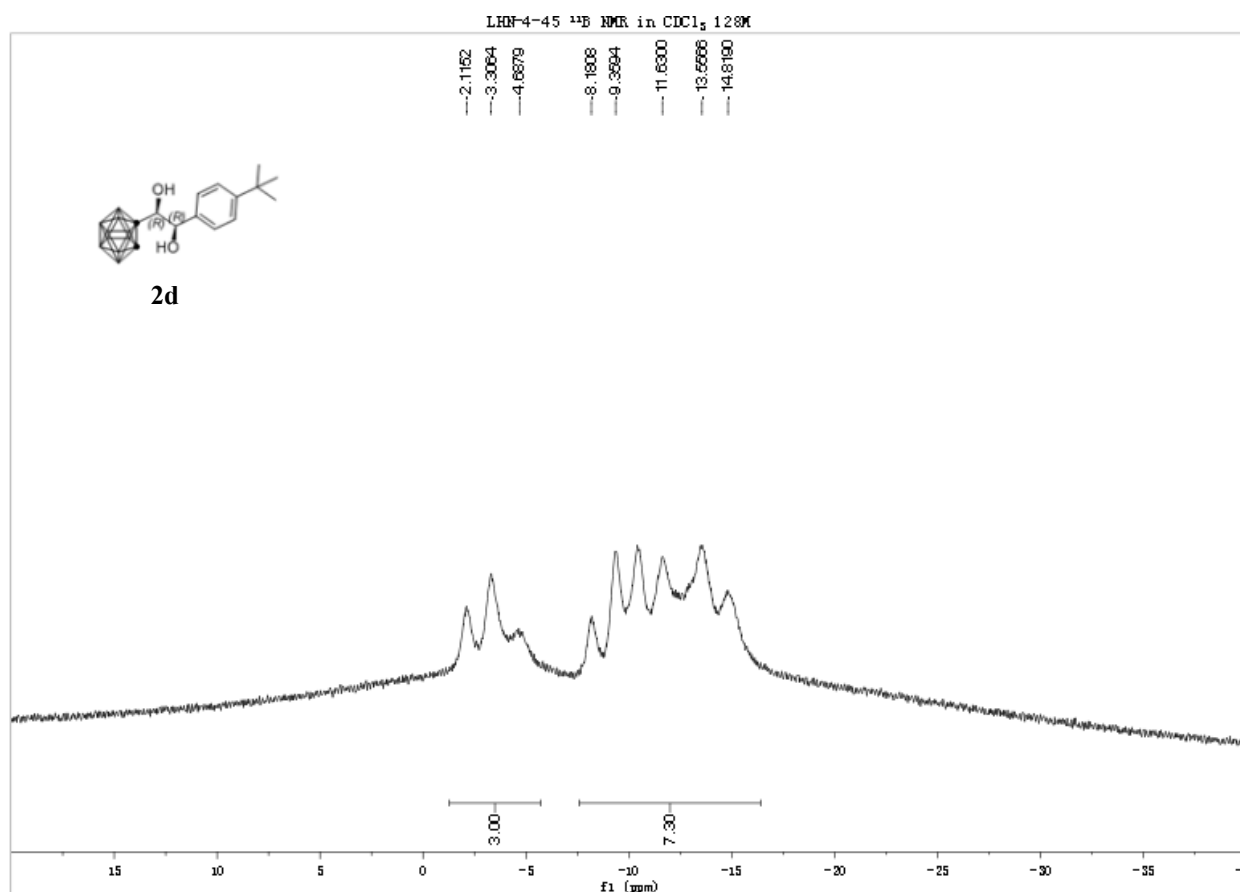

LHN-4-45. HRMS (ESI)  $m/z$  calcd for  $C_{14}H_{27}B_{10}O_2^-$  (M-H)<sup>-</sup> 336.29834, found 336.29819.

LHN-4-4S #8 RT: 0.09 AV: 1 NL: 3.09E5  
T: FTMS - p ESI Full ms [50.0000-750.0000]

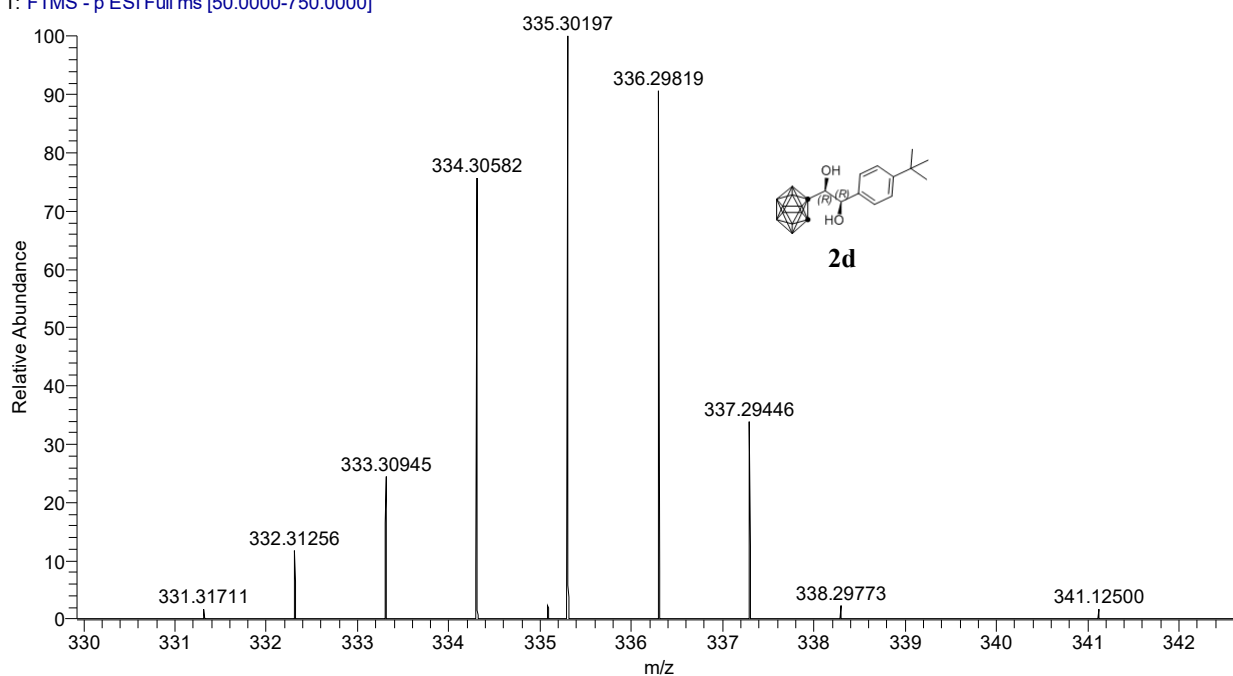

LHN-3-48A <sup>1</sup>H NMR in CDCl<sub>3</sub> 300M

7.2605  
7.2040

4.9245  
4.9109

4.1510  
4.1204  
4.0573

3.3231  
3.2811

2.3622  
2.3441  
2.3301

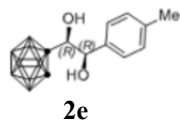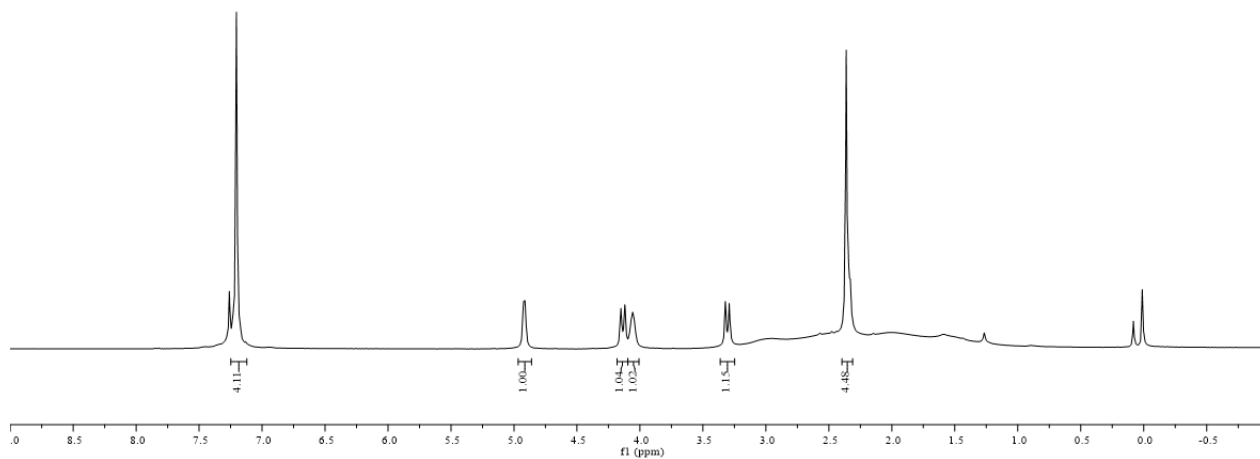

LHN-3-48A <sup>13</sup>C NMR in CDCl<sub>3</sub> 75M

138.6362  
137.1487

129.8222  
125.7920

77.6287  
77.4234  
76.9999  
76.5766  
76.1533  
75.9223

58.0571

21.1290

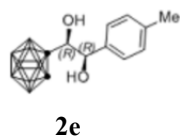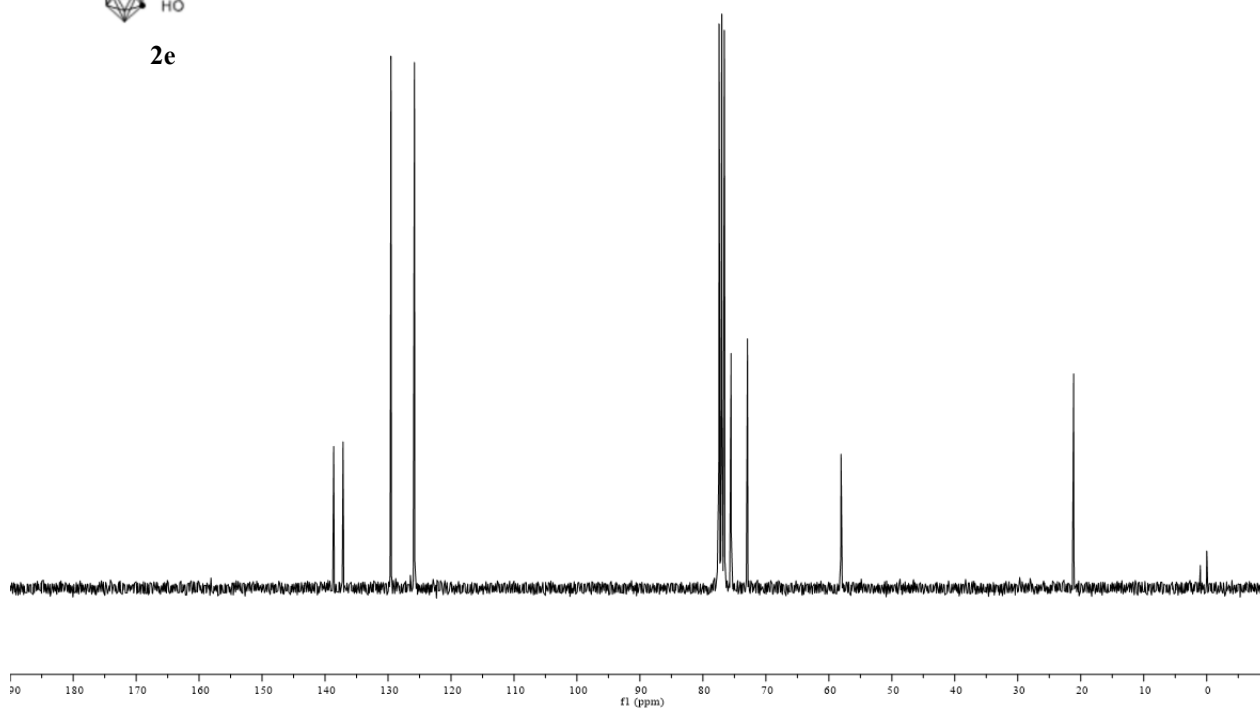

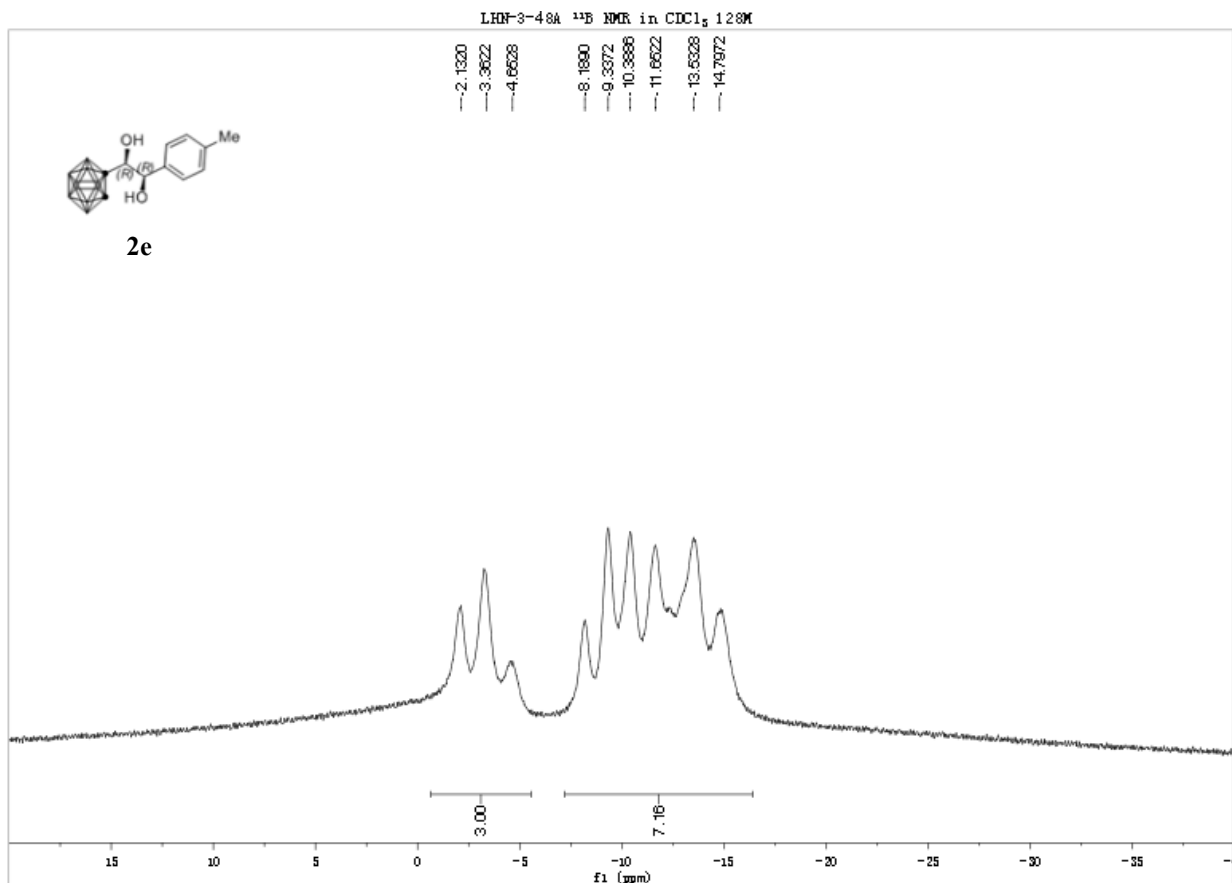

LHN-3-48A. HRMS (ESI)  $m/z$  calcd for  $\text{C}_{11}\text{H}_{21}\text{B}_{10}\text{O}_2^-$  (M-H) $^-$  294.25139, found 294.25131.

LHN-3-48A #8 RT: 0.09 AV: 1 NL: 8.64E5  
T: FTMS - p ESI Full ms [50.0000-750.0000]

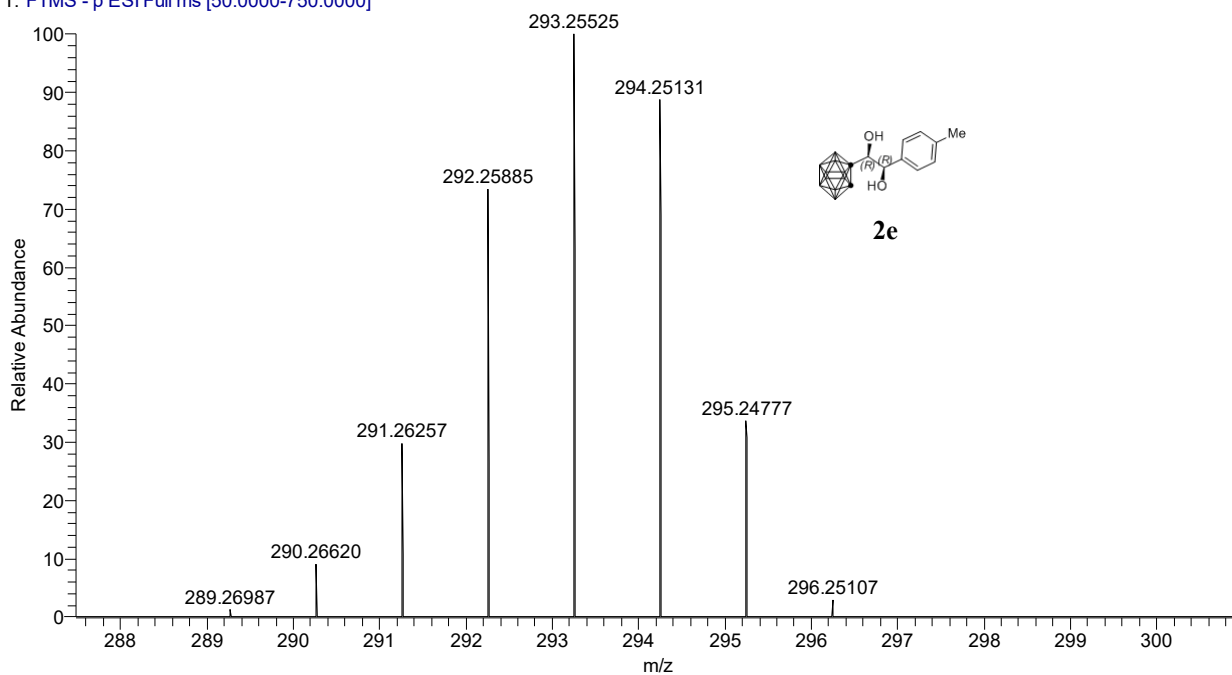

LHN-3-48B <sup>1</sup>H NMR in CDCl<sub>3</sub> 300M

7.2644  
7.2588  
7.2312  
7.1554  
7.1293  
7.1071  
7.0821

4.9075

4.1487  
4.1182  
4.0468

3.2666  
3.2653

2.3827  
2.3882

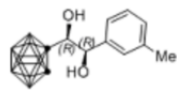

2f

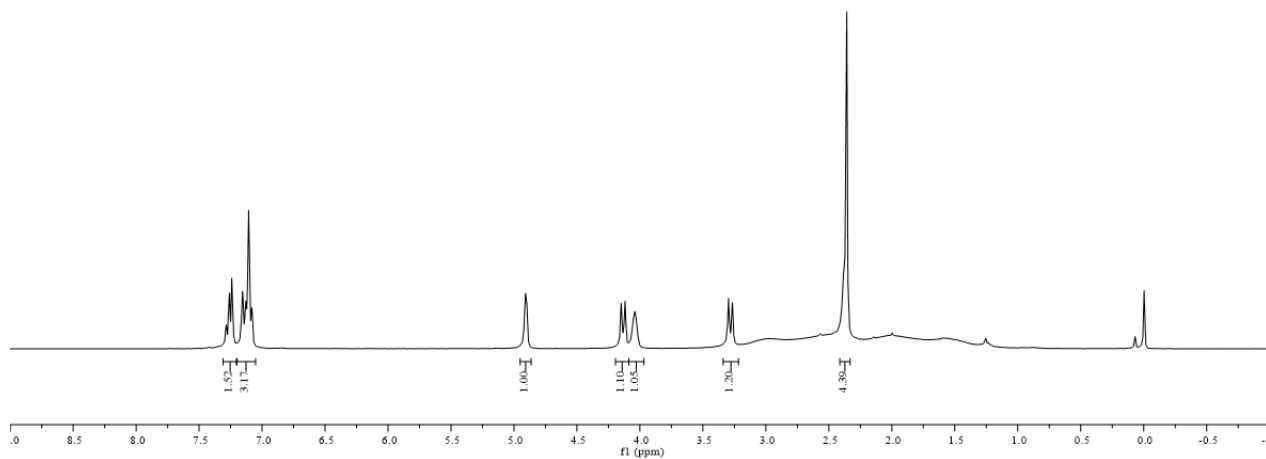

LHN-3-48B <sup>13</sup>C NMR in CDCl<sub>3</sub> 75M

140.0967  
138.6969

129.4264  
128.7678  
128.4473  
122.8327

77.6565  
77.4236  
77.0002  
76.5769  
76.3416  
73.0184

58.0534

21.4719

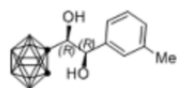

2f

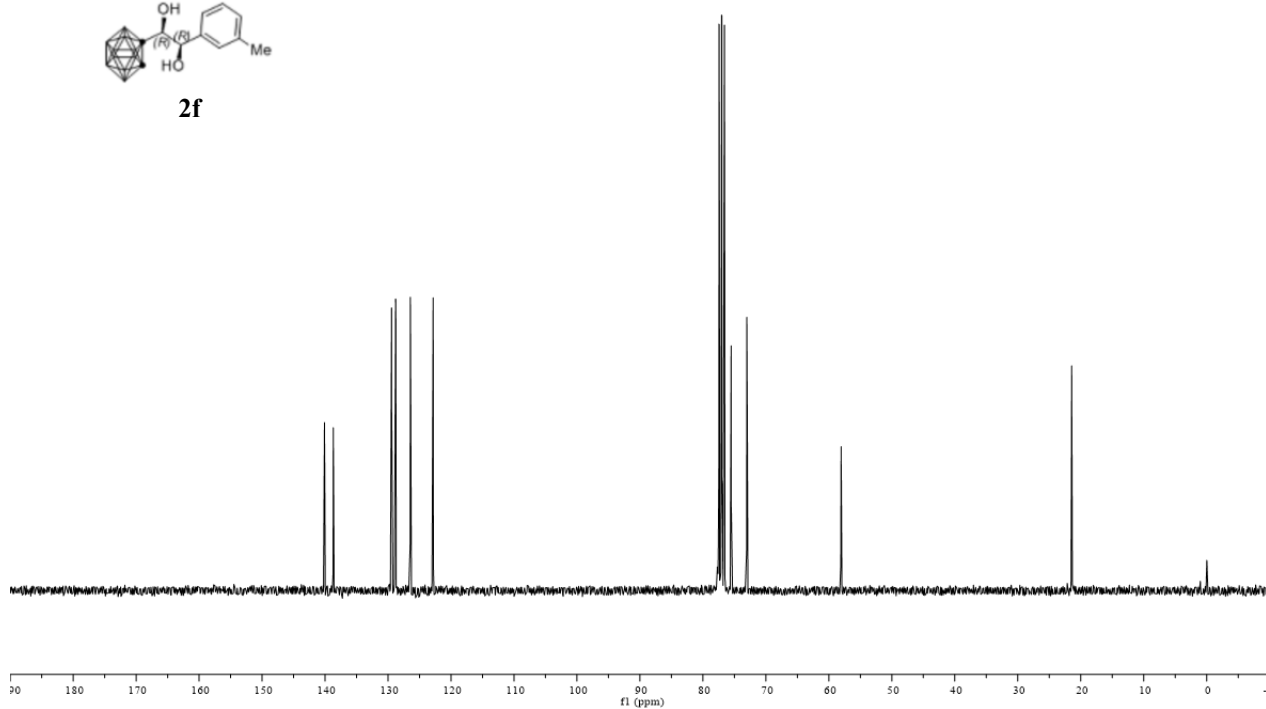

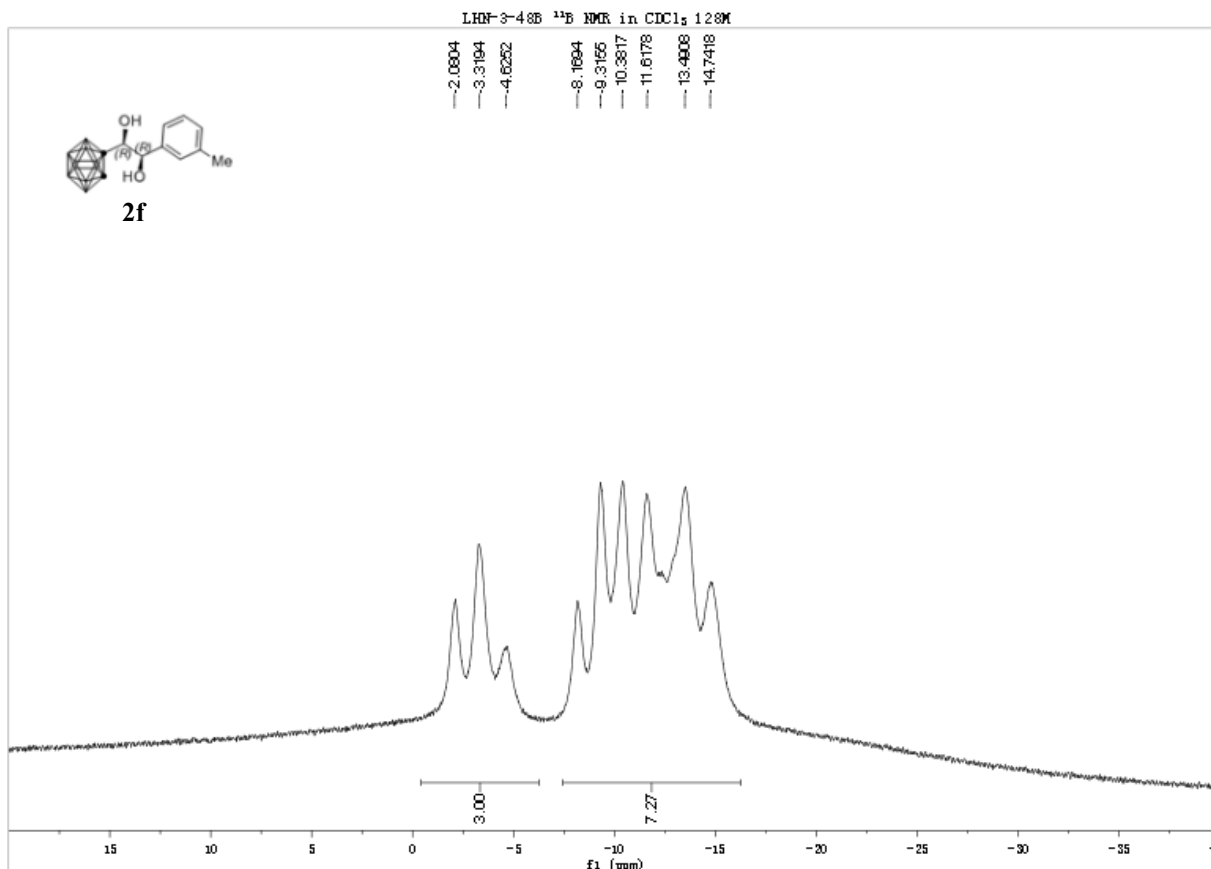

**LHN-3-48B**. HRMS (ESI)  $m/z$  calcd for  $C_{11}H_{21}B_{10}O_2^-$  (M-H)<sup>-</sup> 294.25139, found 294.25140.

LHN-3-48B #8 RT: 0.09 AV: 1 NL: 6.30E5  
T: FTMS - p ESI Full ms [50.0000-750.0000]

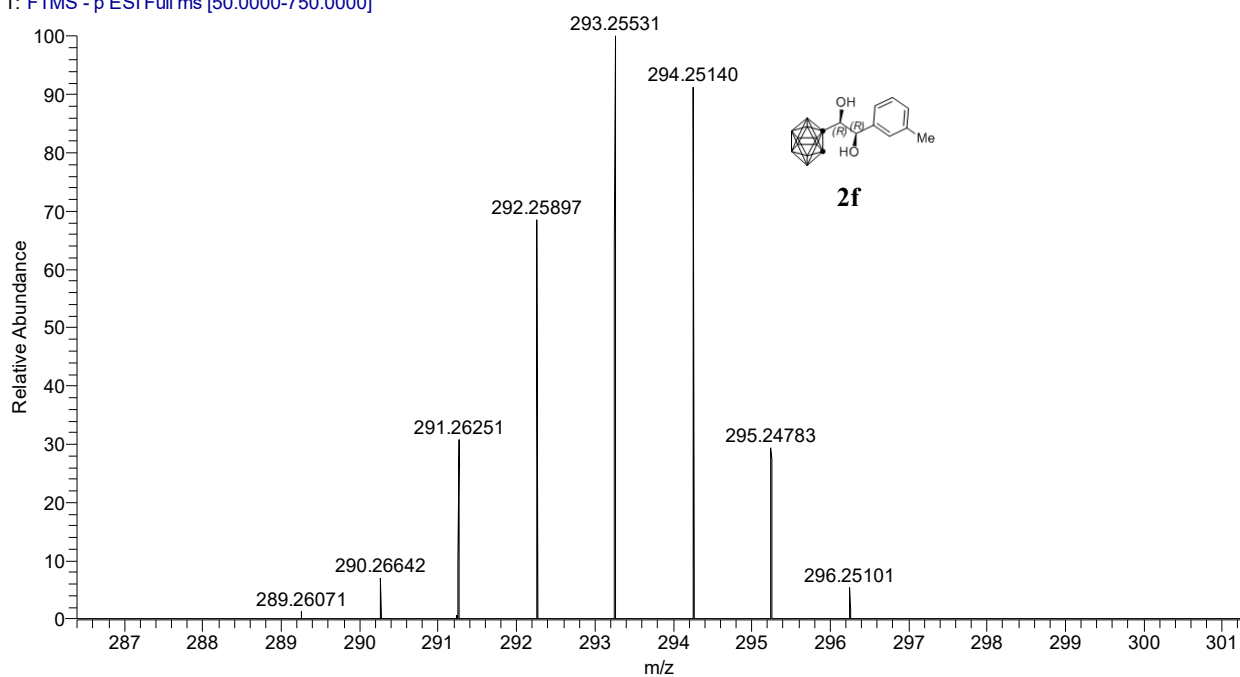

LHN-3-48C <sup>1</sup>H NMR in CDCl<sub>3</sub> 300M

7.4747  
7.4618  
7.4499  
7.4438  
7.4311  
7.4166  
7.2650  
7.2599  
7.2532  
7.2452  
7.2345  
7.2214  
7.1885  
7.1882  
7.1772  
7.1659

5.2299  
4.1104  
4.0830  
2.2811  
2.2855  
2.2725  
2.2714

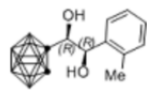

2g

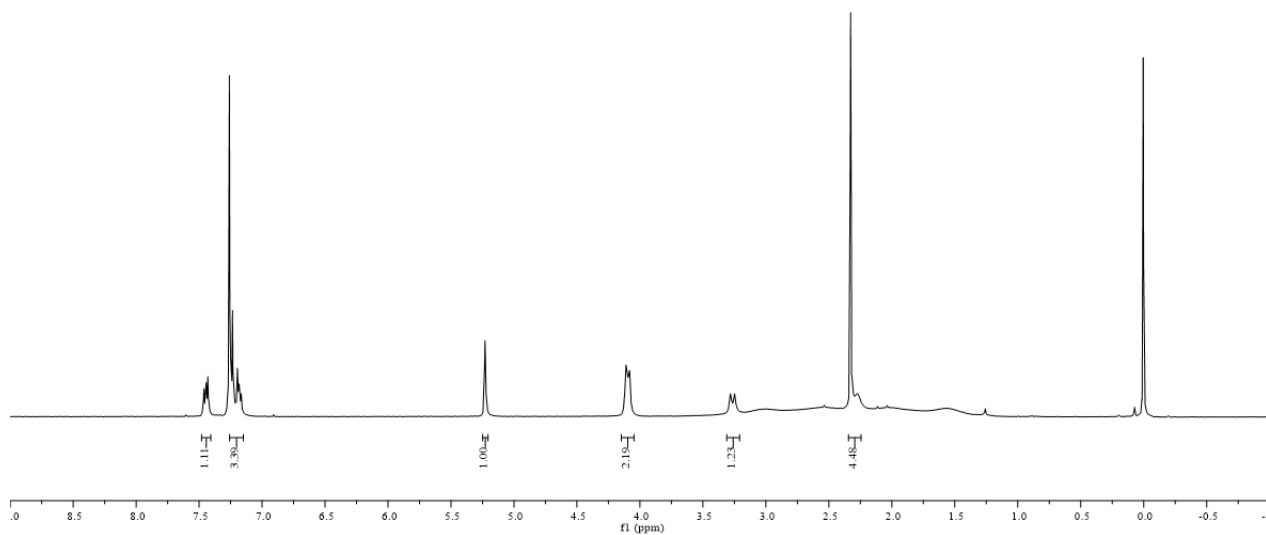

LHN-3-48C <sup>13</sup>C NMR in CDCl<sub>3</sub> 75M

138.0743  
137.8967  
130.8967  
128.4503  
126.4515  
125.4124

77.8467  
77.4235  
77.0003  
76.5769  
73.7367  
69.4330

57.9888

19.2834

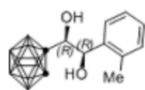

2g

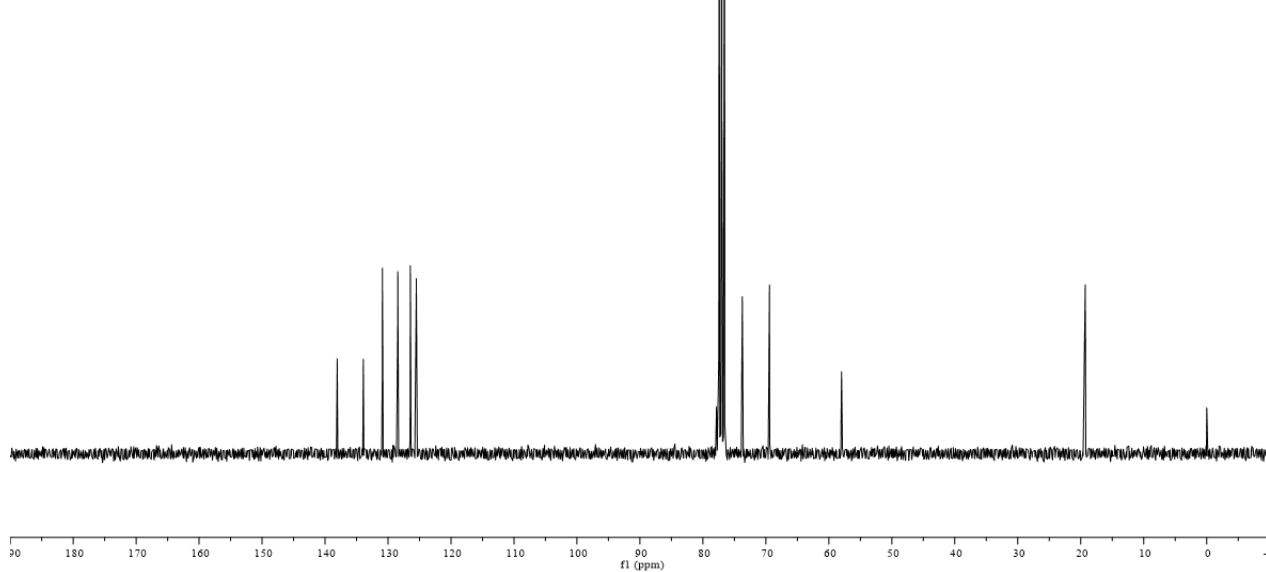

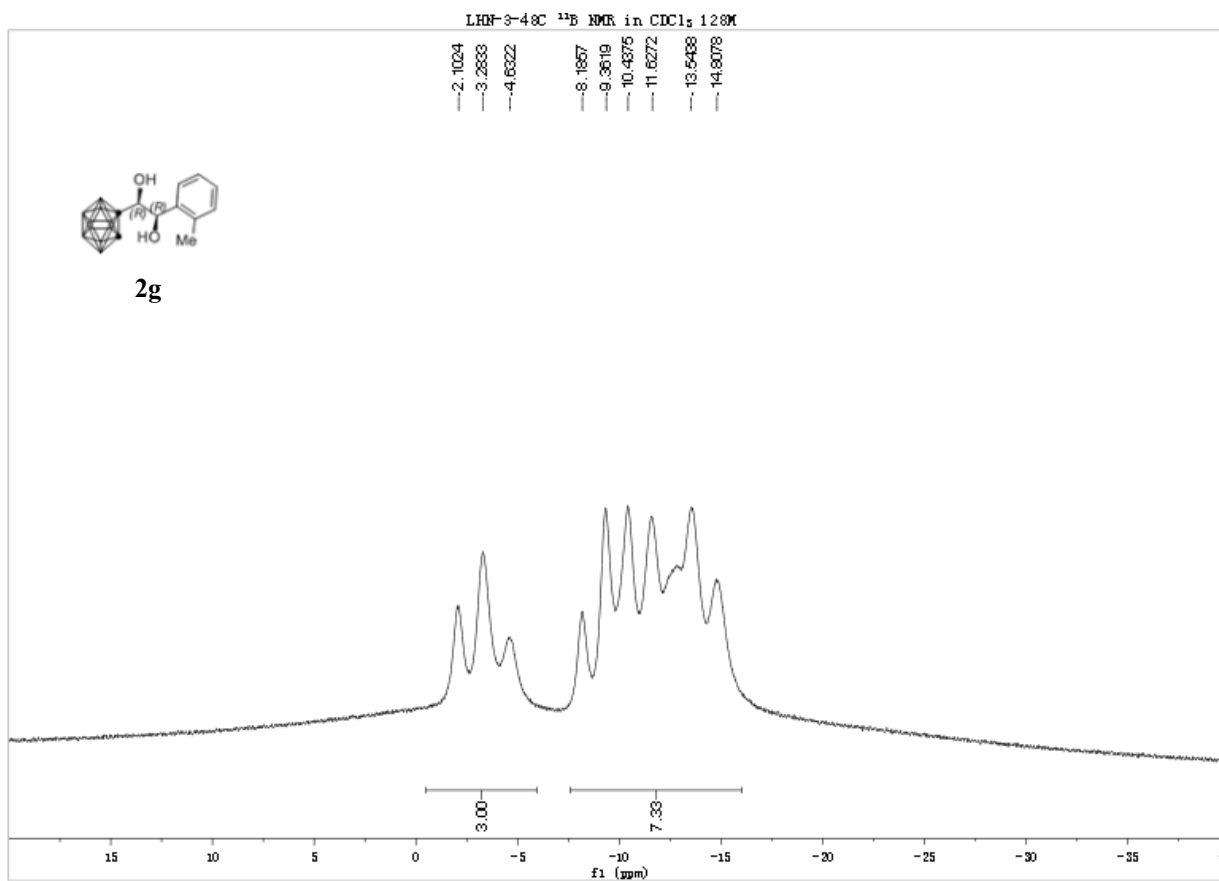

LHN-3-48C. HRMS (ESI)  $m/z$  calcd for  $\text{C}_{11}\text{H}_{21}\text{B}_{10}\text{O}_2^-$  (M-H) $^-$  294.25139, found 294.25137.

LHN-3-48C #10 RT: 0.11 AV: 1 NL: 1.01E6  
T: FTMS - p ESI Full ms [50.0000-750.0000]

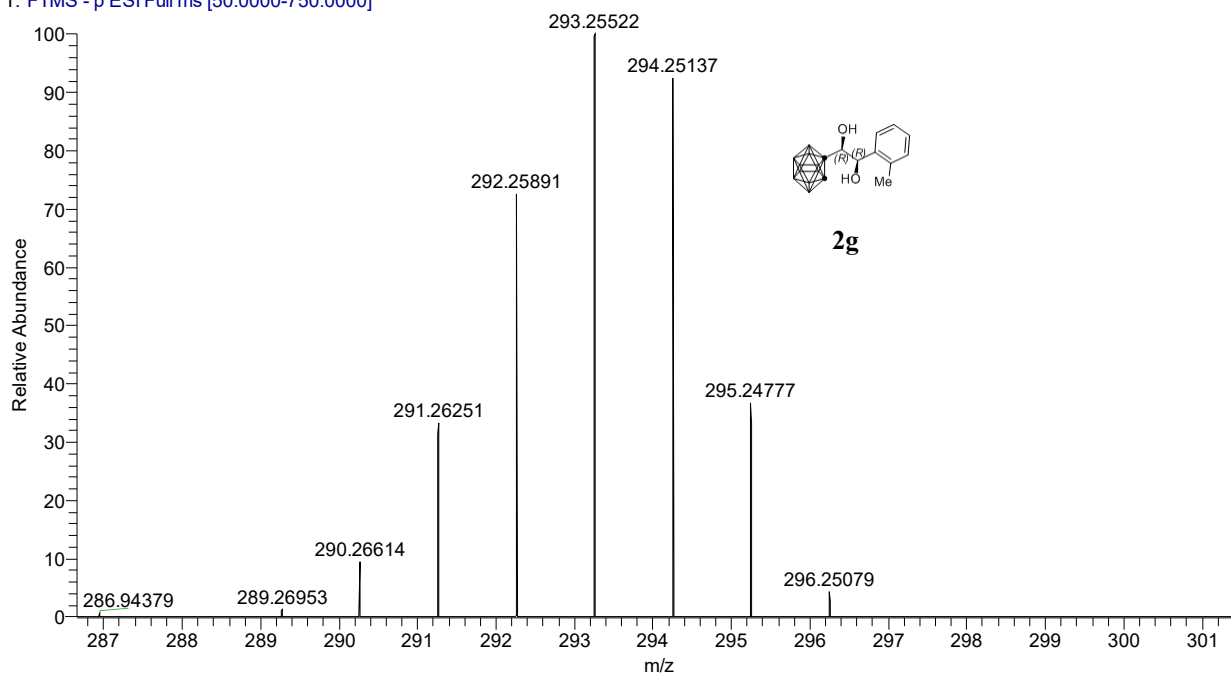

LHN-3-48F 1H NMR in CDCl<sub>3</sub> 300M

7.6642  
7.6370  
7.4753  
7.4479  
7.2959

5.0899  
5.0727

4.1705  
4.1380  
4.0805

3.3022  
3.2889

2.6029  
2.5879

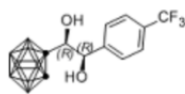

**2h**

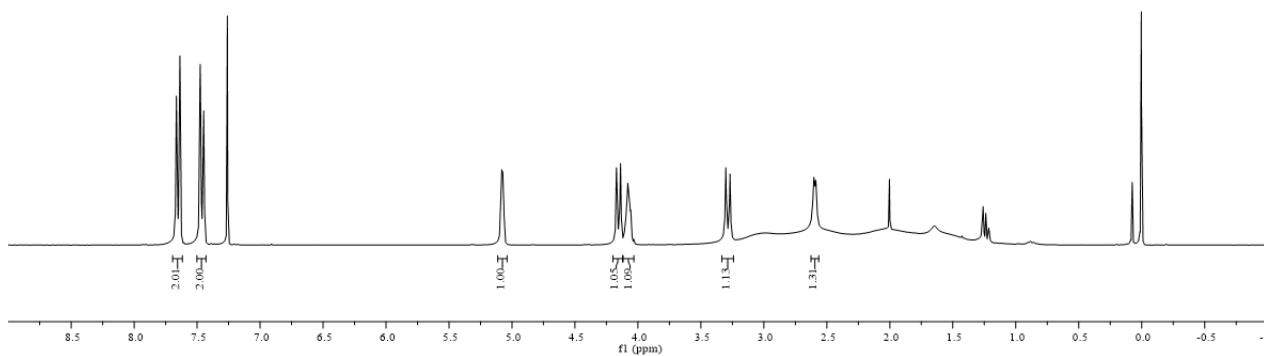

LHN-3-48F 13C NMR in CDCl<sub>3</sub> 75M

143.6671  
143.9512  
131.4642  
131.0313  
130.9591  
129.8466  
129.2346  
126.2282  
125.8344  
125.7853  
125.7354  
125.6856  
125.6220  
122.9150  
118.4080

77.4236  
77.3129  
77.1994  
77.0902  
76.5768  
75.5025  
72.4280

57.8774

<sup>13</sup>C NMR (75 MHz, Chloroform-d) δ 125.76 (q, J = 3.7 Hz).

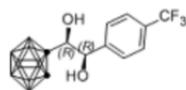

**2h**

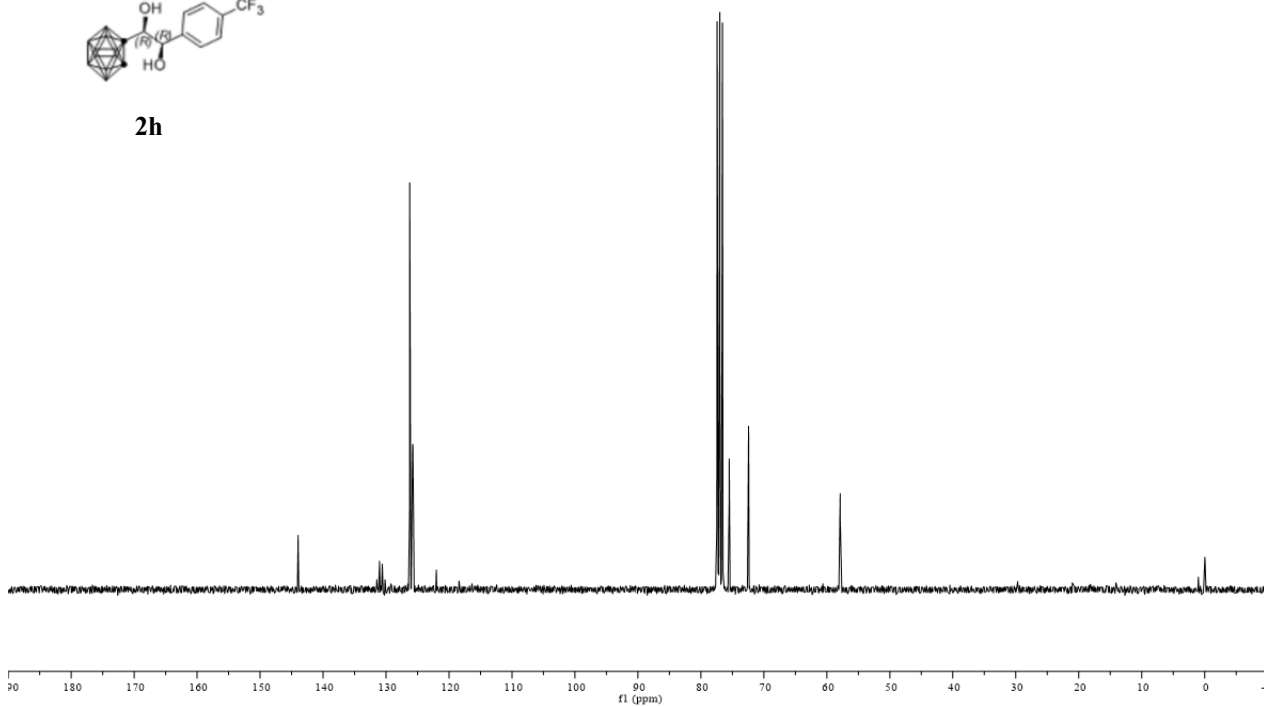



LHN-3-48F 19F NMR in CDCl<sub>3</sub> 376M

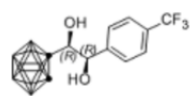

2h

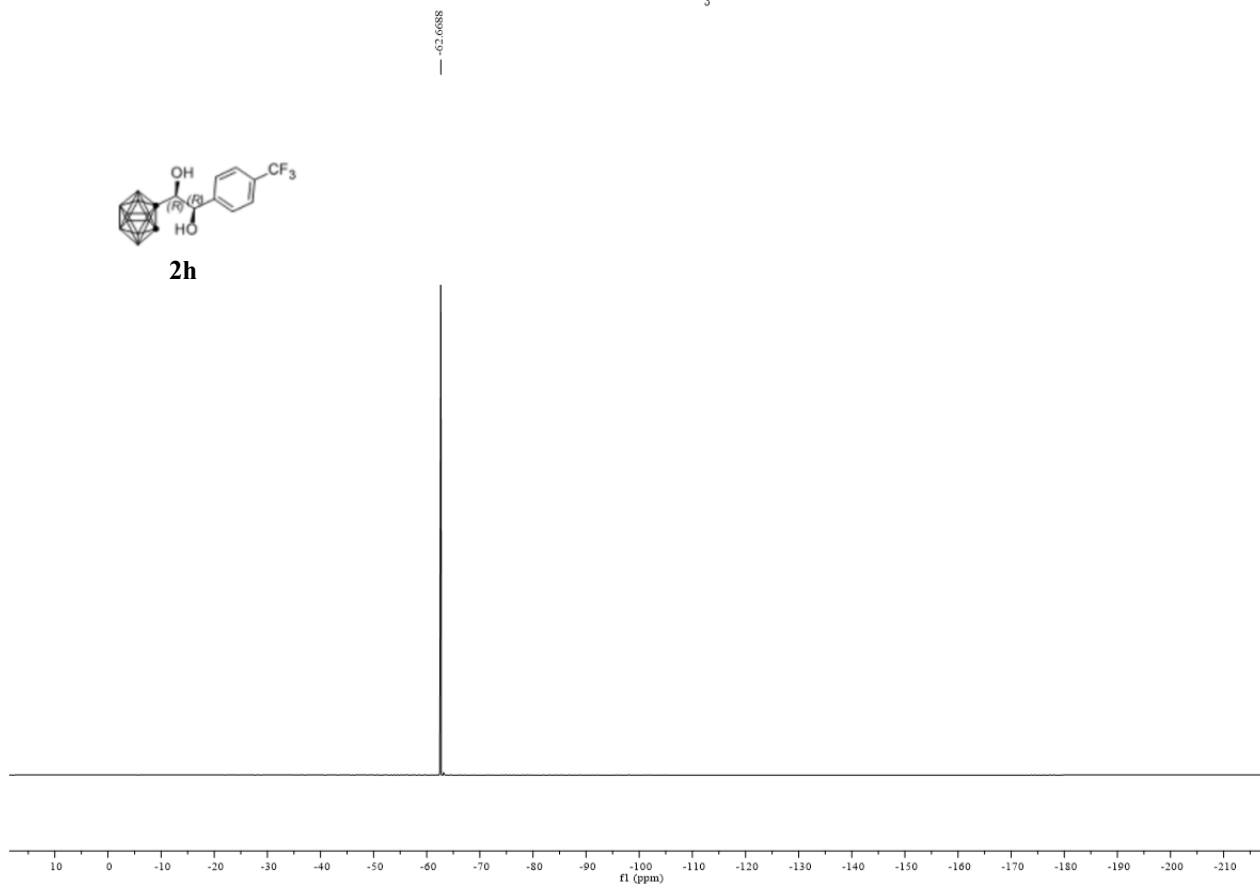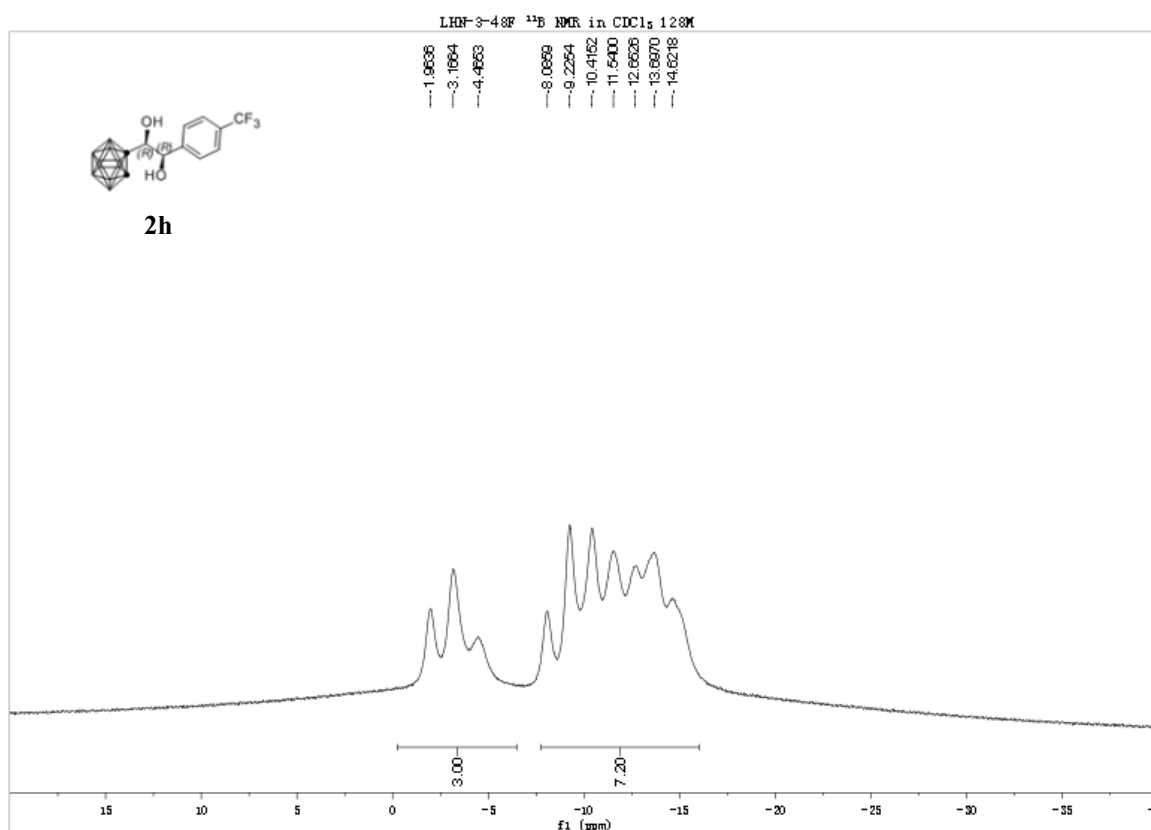

LHN-3-48F. HRMS (ESI)  $m/z$  calcd for C<sub>11</sub>H<sub>18</sub>B<sub>10</sub>F<sub>3</sub>O<sub>2</sub><sup>-</sup> (M-H)<sup>-</sup> 348.22312, found 348.22302.

LHN-3-48F #12 RT: 0.13 AV: 1 NL: 2.82E5  
T: FTMS - p ESI Full ms [50.0000-750.0000]

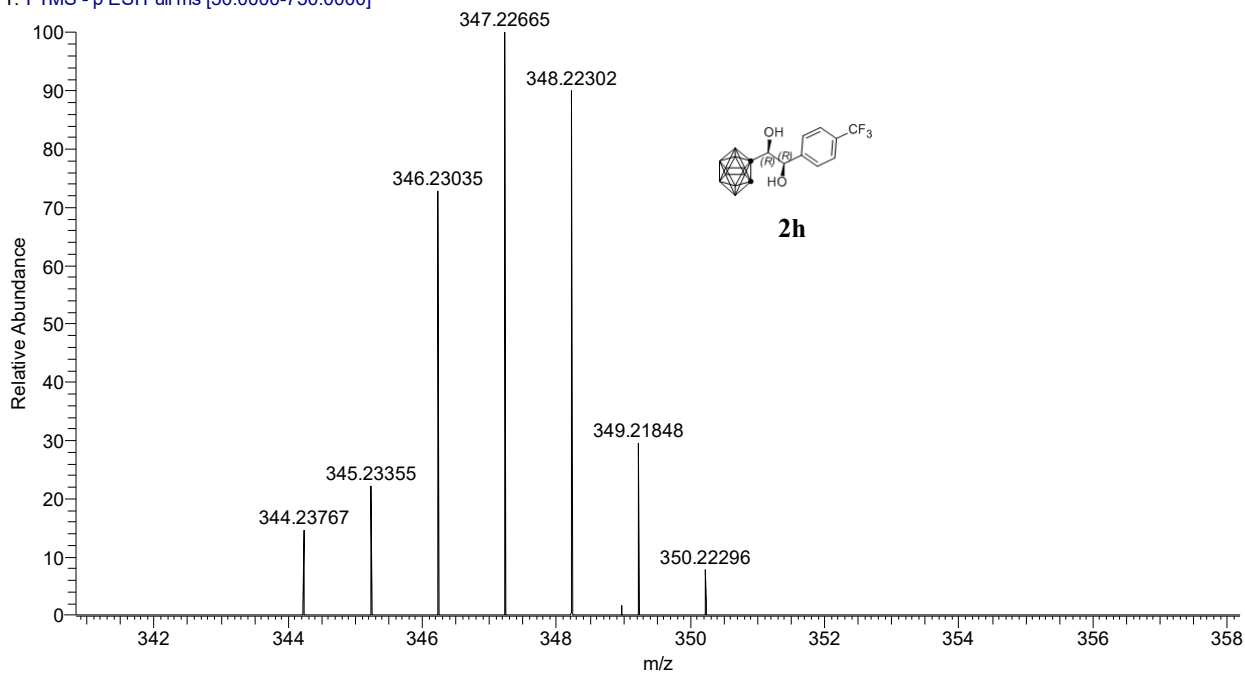

LHN-3-48G 1H NMR in CDCl<sub>3</sub> 300M

7.62660  
7.6152  
7.6011  
7.5948  
7.5886  
7.5800  
7.5303  
7.5262  
7.5200  
7.5159  
7.5097  
7.5000

5.0805  
5.0705

4.1894  
4.1876  
4.0771

3.2857  
3.2524

2.5443  
2.5366

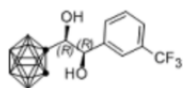

**2i**

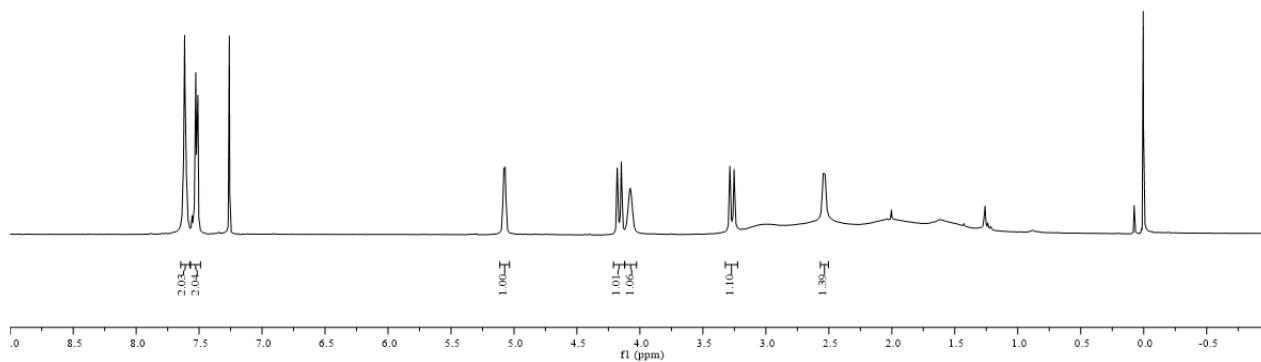

LHN-3-48G <sup>13</sup>C NMR in CDCl<sub>3</sub> 75M

141.0819  
131.8823  
131.4516  
131.0205  
80.5887  
80.5887  
129.2800  
129.1937  
125.6280  
125.5257  
125.4770  
125.4271  
125.3814  
122.8184  
122.7679  
122.7178  
122.6680  
122.0171  
118.4076

77.4235  
77.3298  
77.2361  
77.0000  
76.5767  
75.4722  
72.4376

57.9168

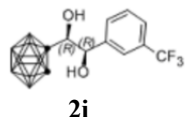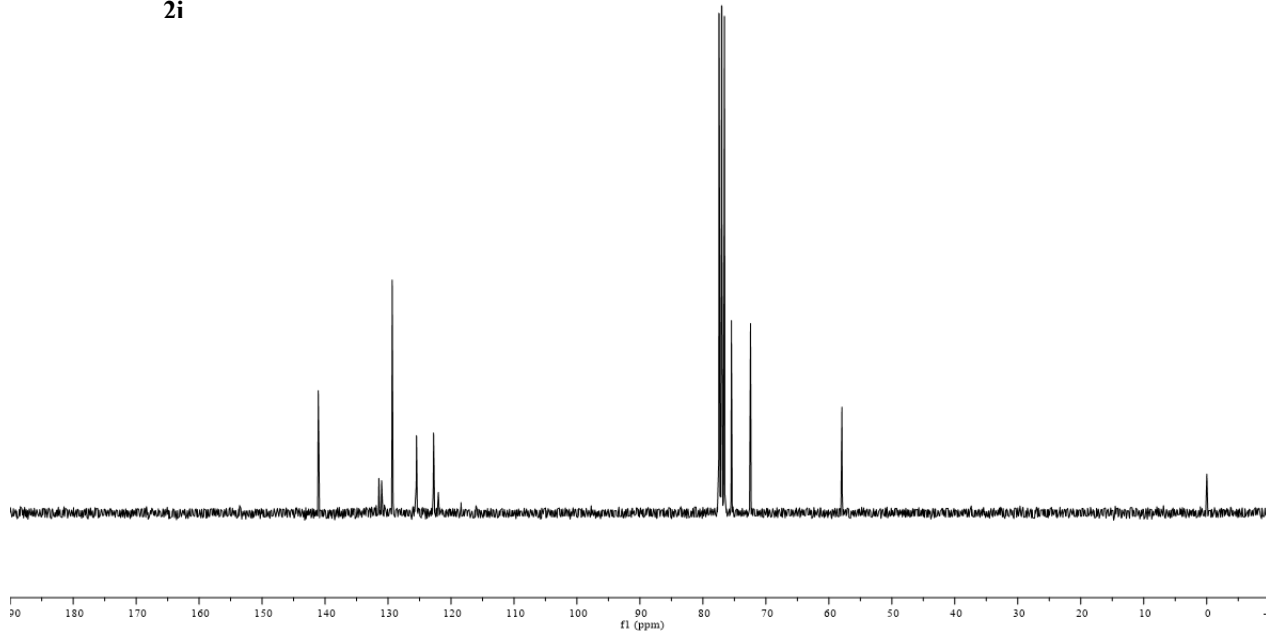

LHN-3-48G <sup>19</sup>F NMR in CDCl<sub>3</sub> 376M

-62.6373

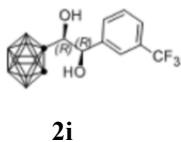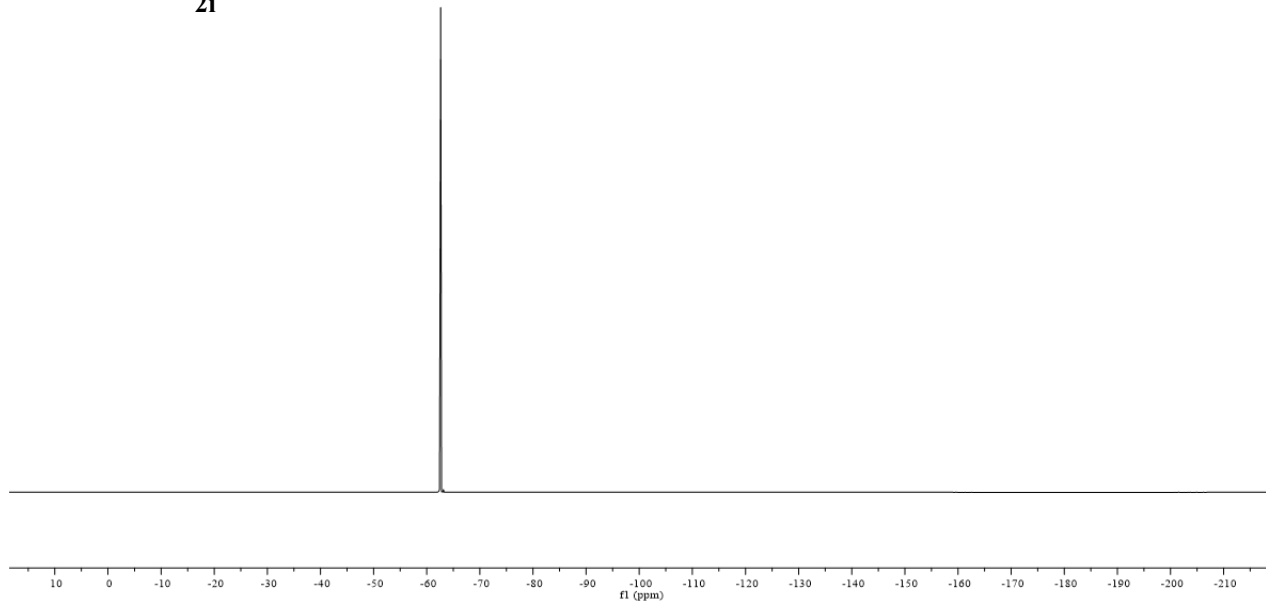

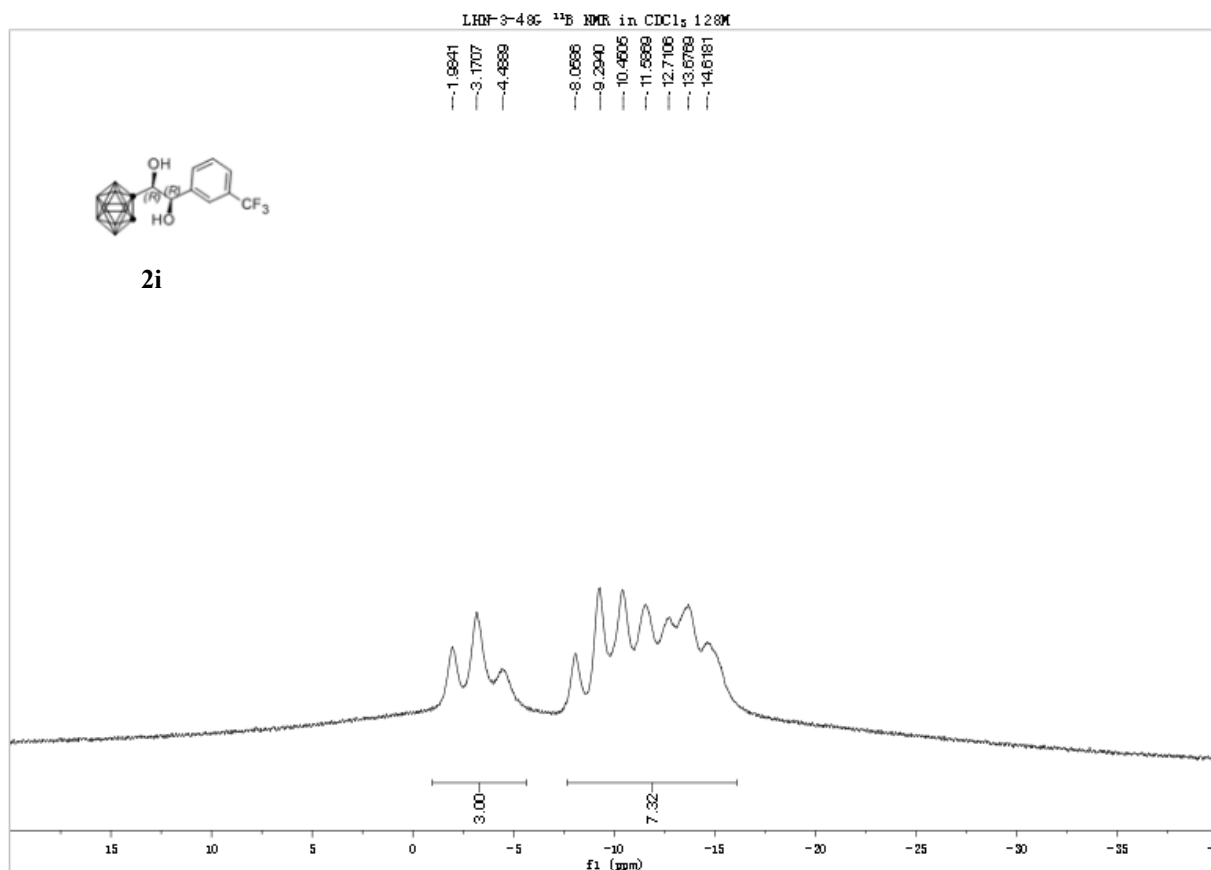

LHN-3-48G. HRMS (ESI) m/z calcd for C<sub>11</sub>H<sub>18</sub>B<sub>10</sub>F<sub>3</sub>O<sub>2</sub><sup>-</sup> (M-H)<sup>-</sup> 348.22312, found 348.22302.

LHN-3-48G #10 RT: 0.11 AV: 1 NL: 3.71E5  
T: FTMS - p ESI Full ms [50.0000-750.0000]

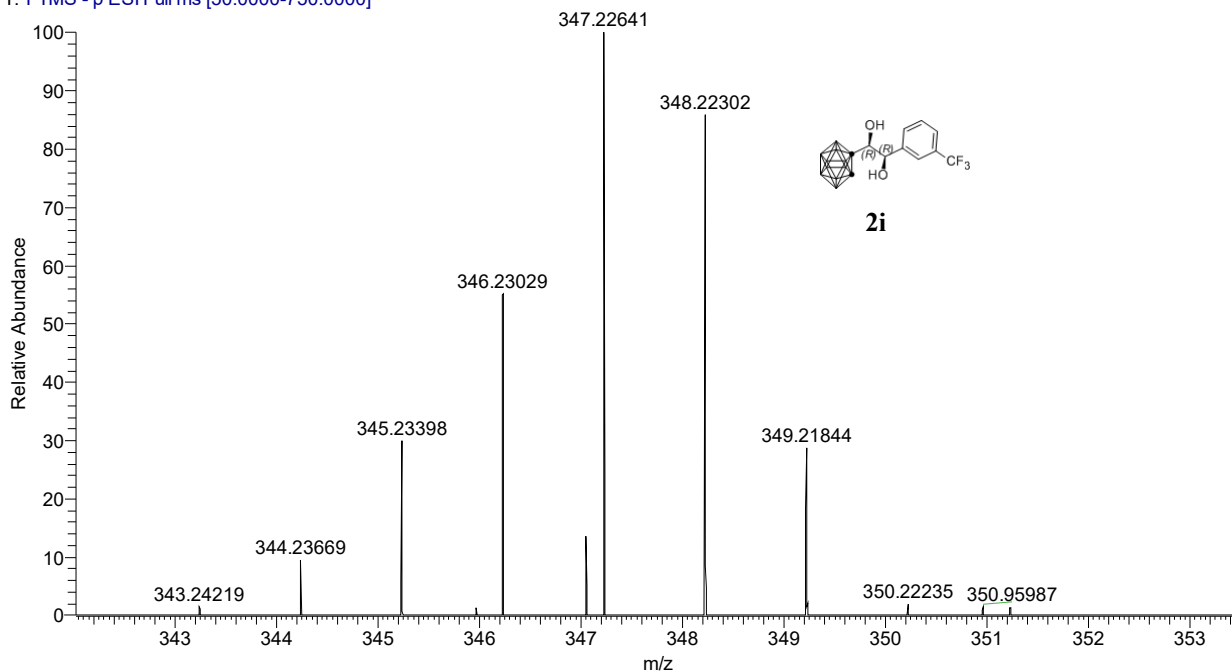

LHN-3-48D 1H NMR in CDCl<sub>3</sub> 300M

7.2896  
7.2482  
7.2312  
6.9010  
6.8723

4.8902  
4.1566  
4.1091  
4.0641  
3.7958  
3.3704  
3.3405  
2.3364

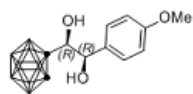

2j

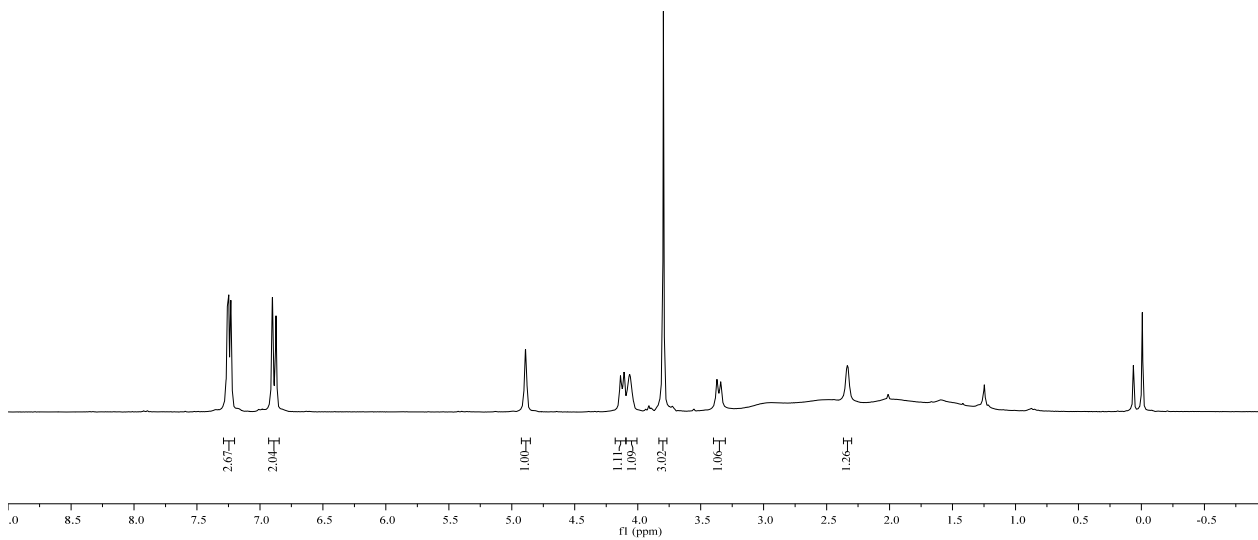

LHN-3-48D 13C NMR in CDCl<sub>3</sub> 75M

159.8177

132.2251  
127.3010

114.2065

77.6486  
77.4236  
77.0003  
76.5769  
75.4470  
72.7387

58.0795  
55.3447

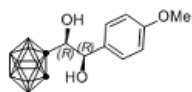

2j

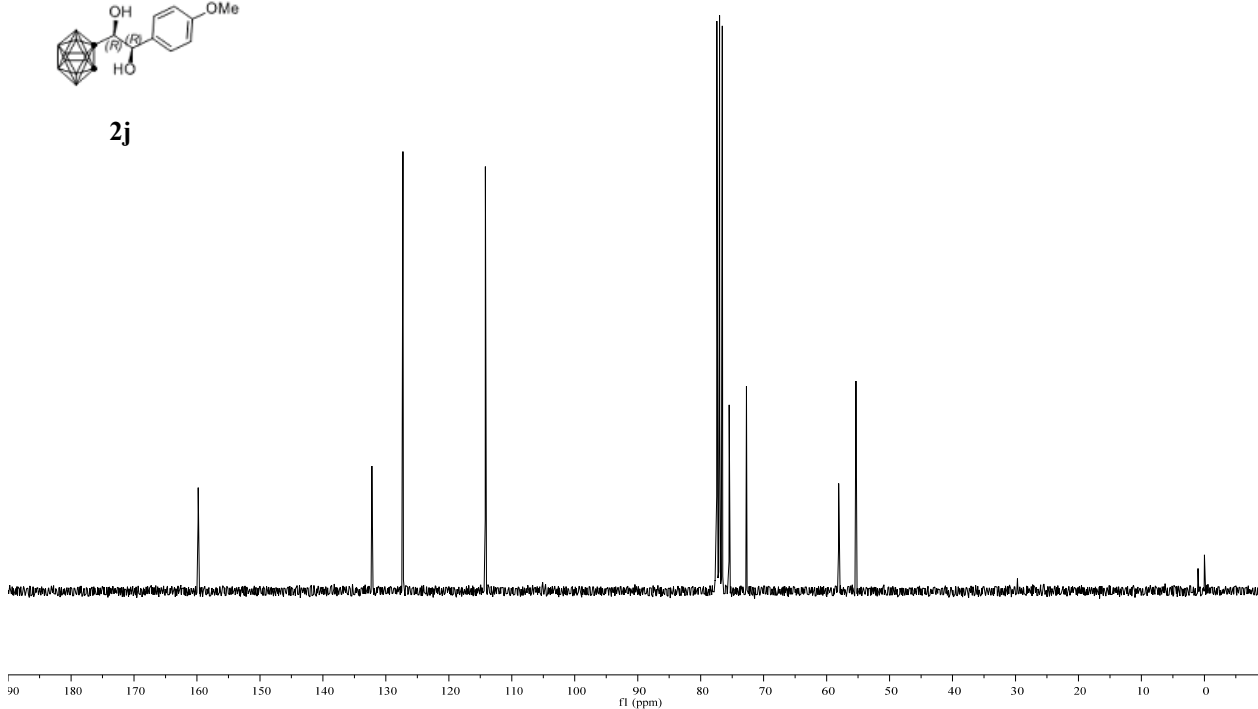

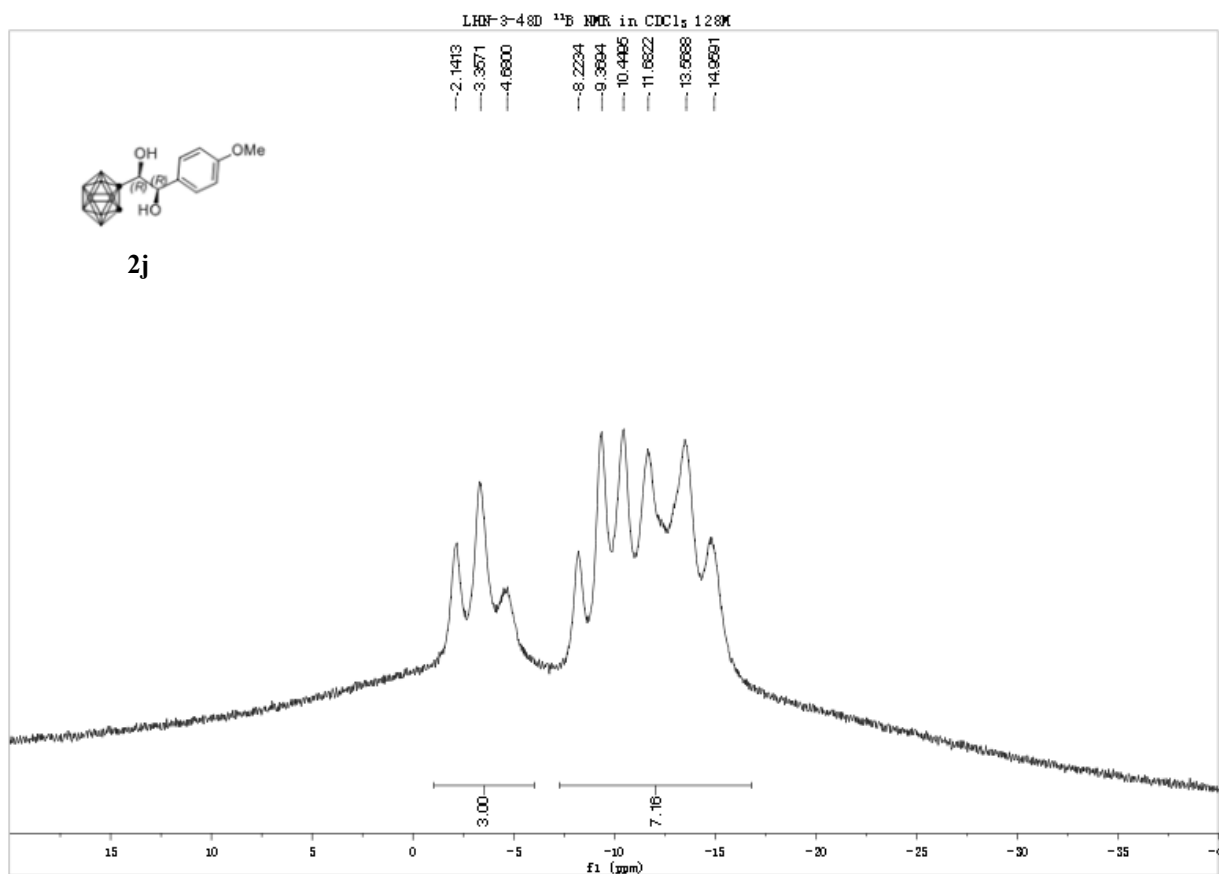

LHN-3-48D. HRMS (ESI)  $m/z$  calcd for C<sub>11</sub>H<sub>21</sub>B<sub>10</sub>O<sub>3</sub><sup>-</sup> (M-H)<sup>-</sup> 310.24630, found 310.24643.

LHN-3-48D #8 RT: 0.09 AV: 1 NL: 8.13E5  
T: FTMS - p ESI Full ms [50.0000-750.0000]

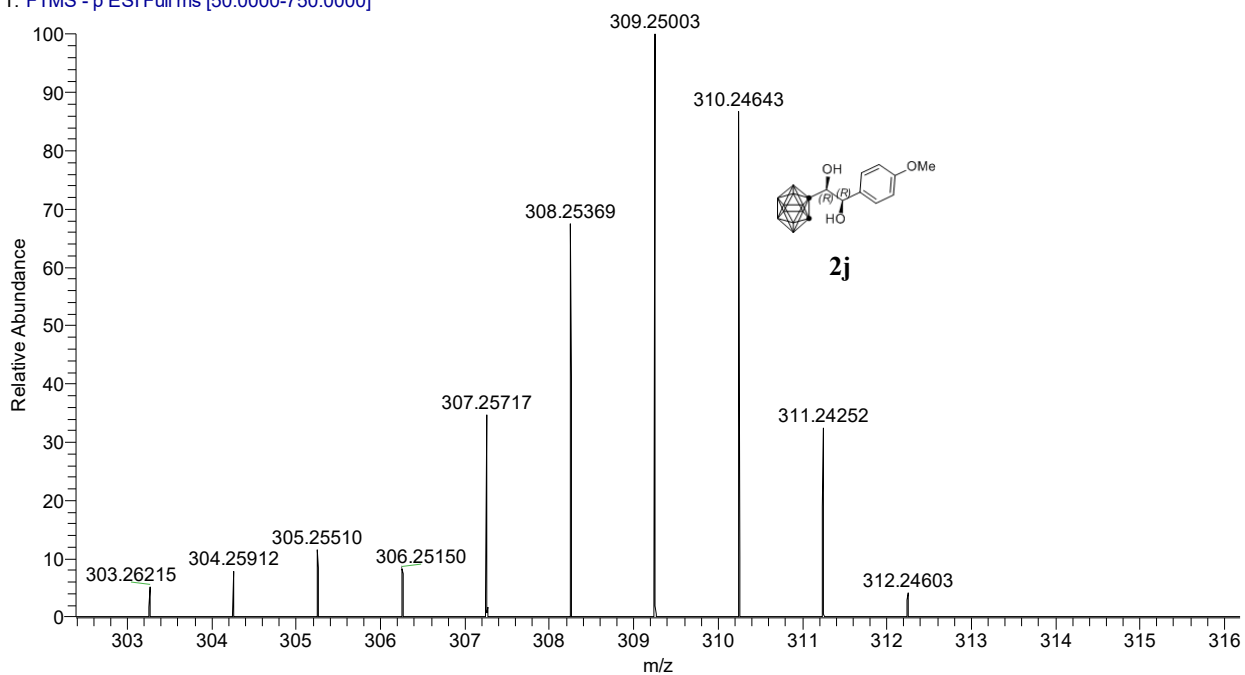

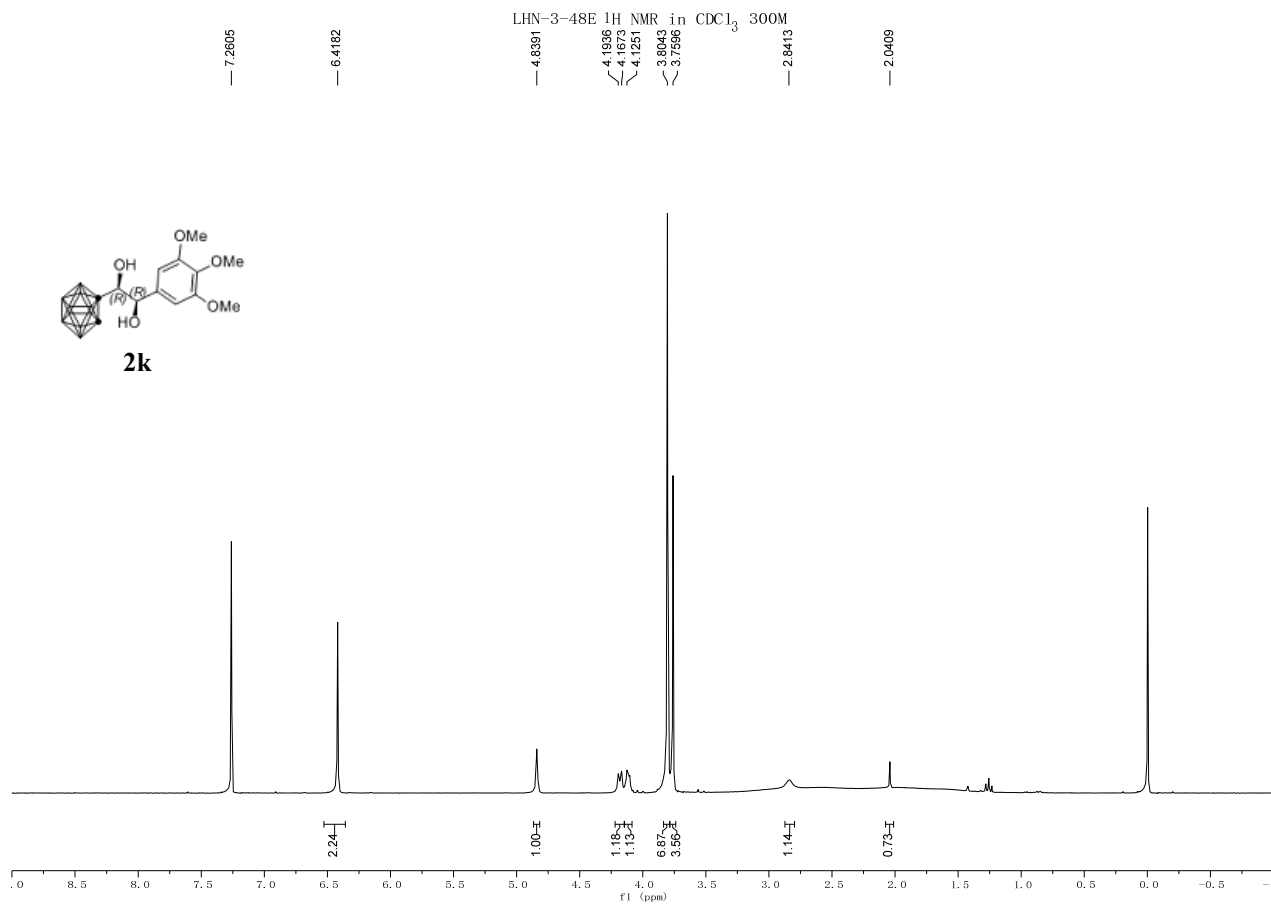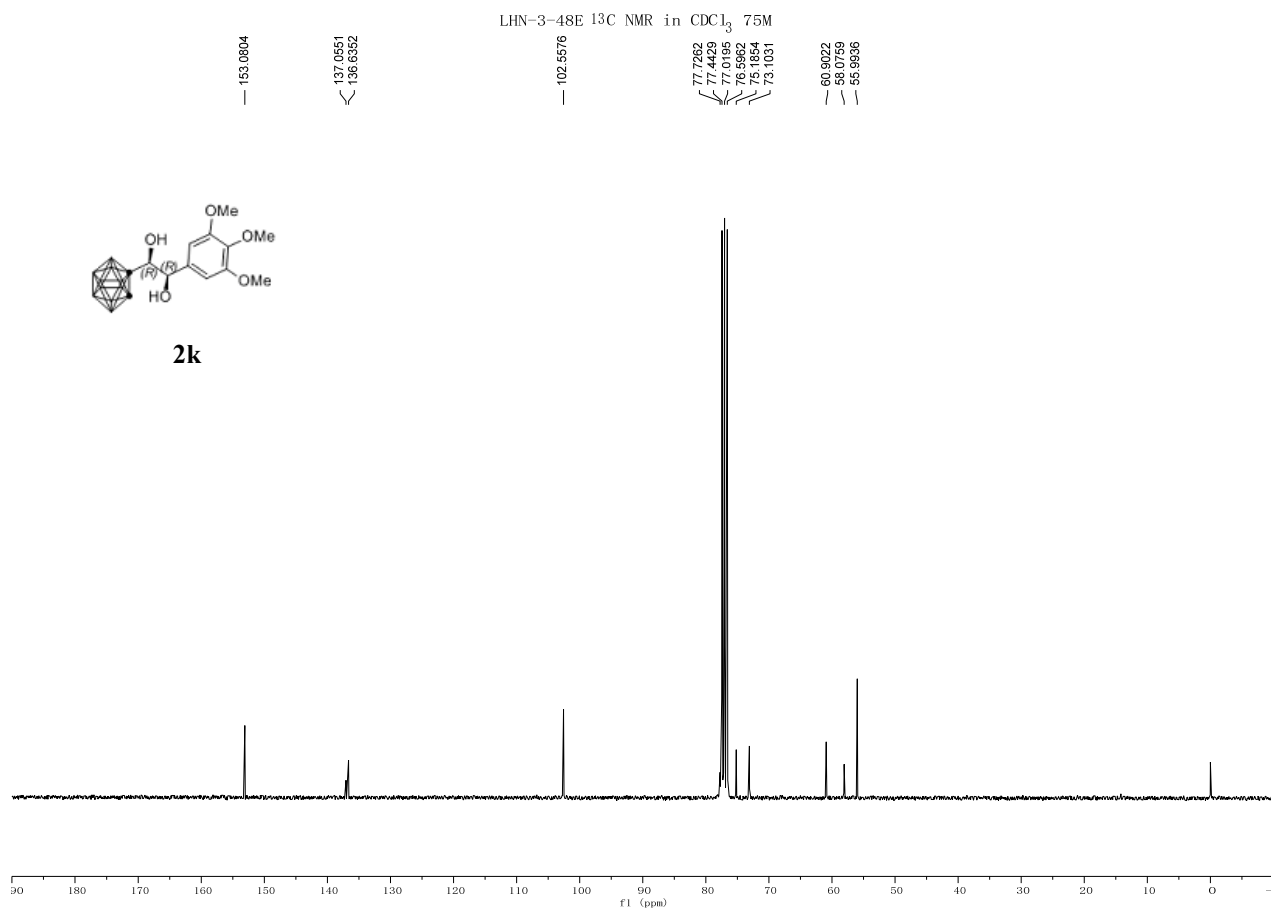

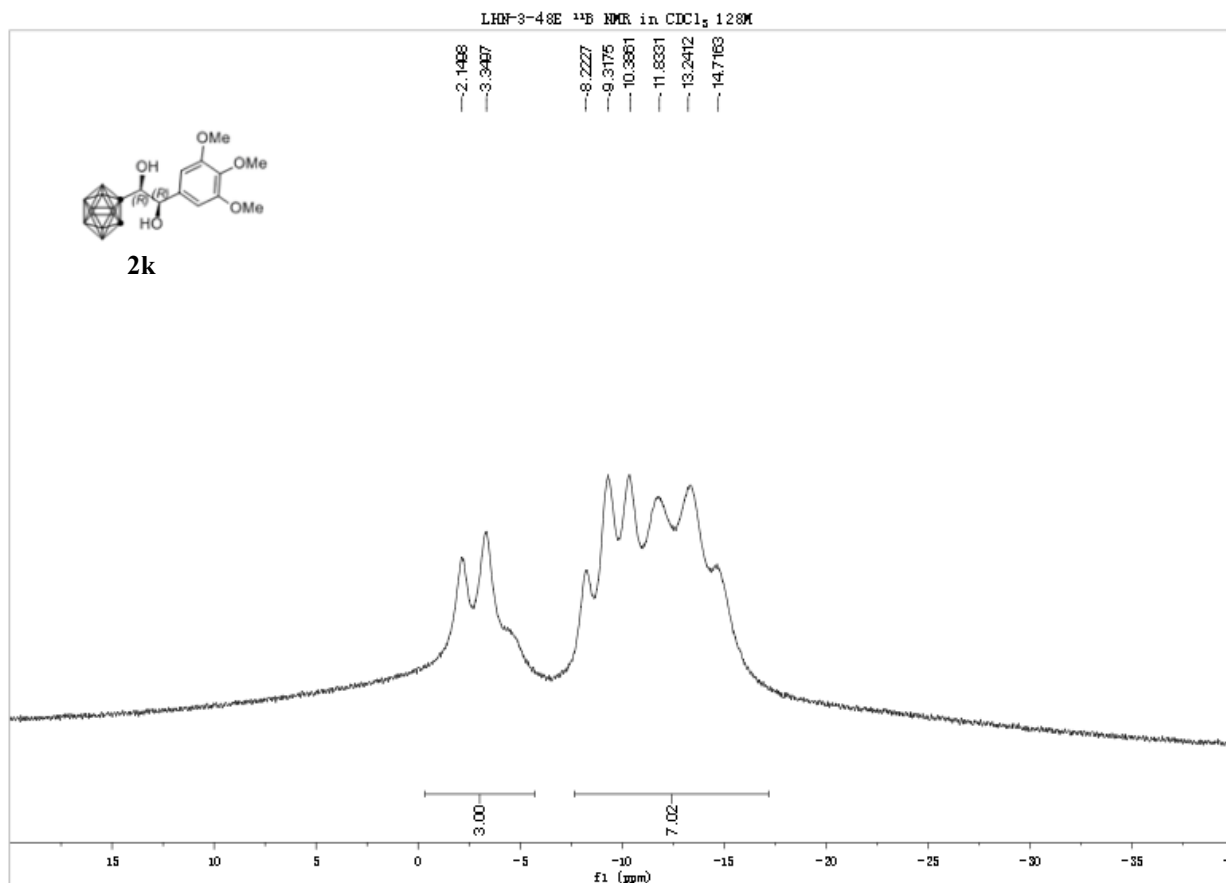

LHN-3-48E. HRMS (ESI) m/z calcd for C<sub>13</sub>H<sub>25</sub>B<sub>10</sub>O<sub>5</sub><sup>-</sup> (M-H)<sup>-</sup> 370.26743, found 370.26706.

LHN-3-48E #16 RT: 0.18 AV: 1 NL: 7.65E4  
T: FTMS - p ESI Full ms [50.0000-750.0000]

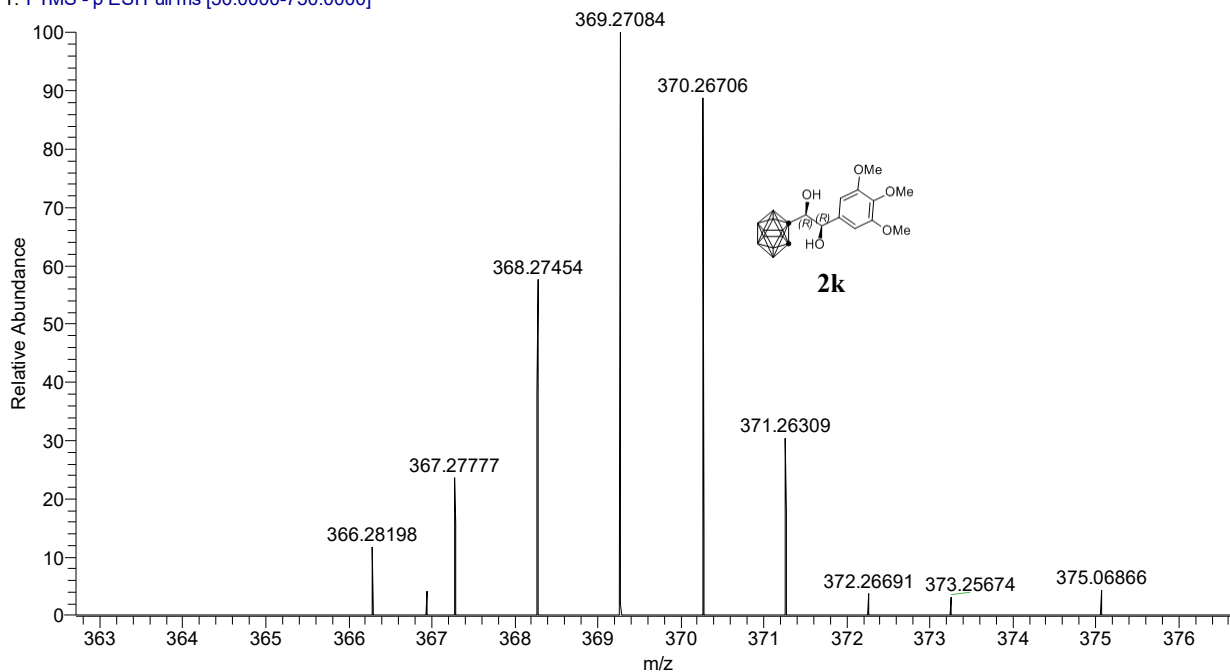



7.8825  
7.8541  
7.8305  
7.8242  
7.5340  
7.5199  
7.4146  
7.3880  
7.2800

LHN-4-41 <sup>1</sup>H NMR in CDCl<sub>3</sub> 300M

5.1628  
4.2665  
4.1154  
3.3347  
2.4777

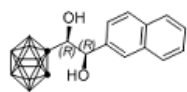

2l

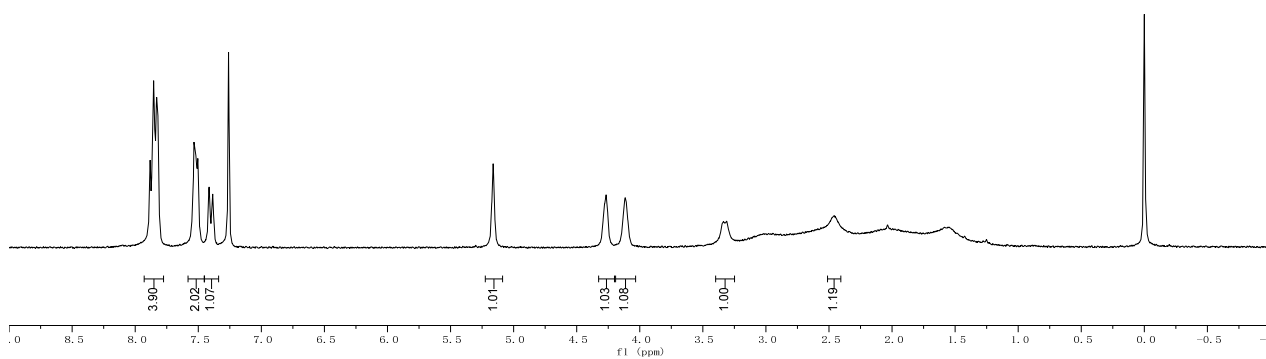

LHN-4-41 <sup>13</sup>C NMR in CDCl<sub>3</sub> 75M

137.4657  
133.2665  
133.0836  
128.9043  
128.0949  
127.8400  
126.8118  
126.6954  
123.5846  
123.3846

77.6294  
77.5302  
77.1066  
76.6835  
75.4912  
73.1362

58.1237

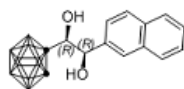

2l

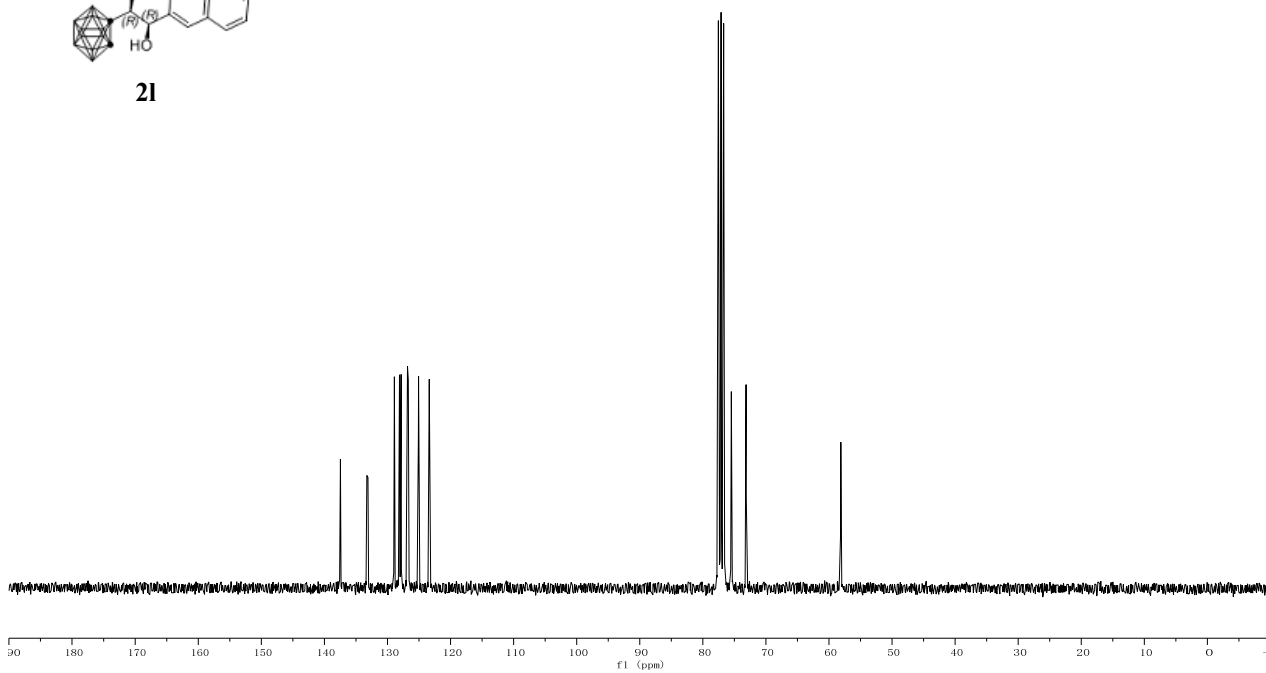

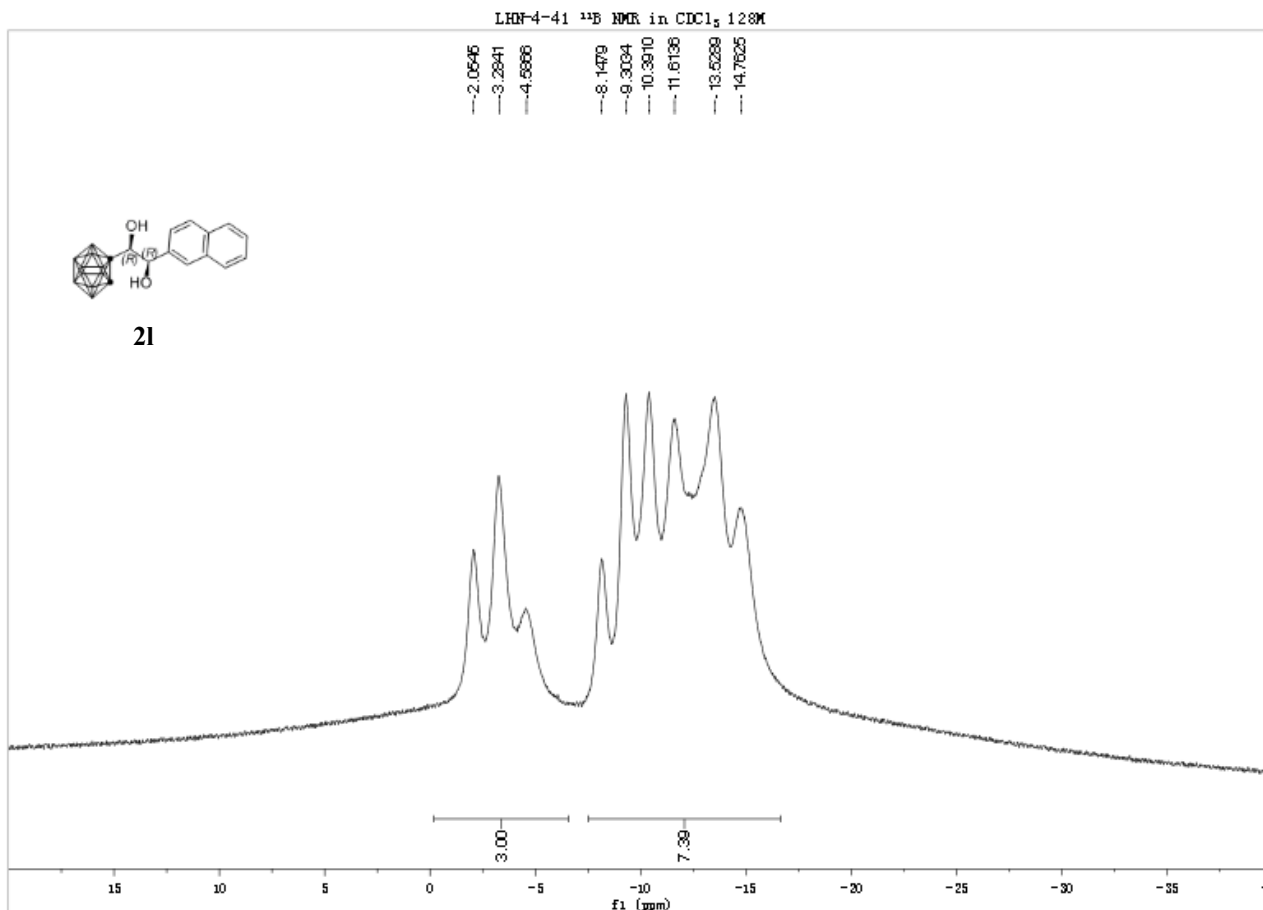

**LHN-4-41.** HRMS (ESI) m/z calcd for C<sub>14</sub>H<sub>21</sub>B<sub>10</sub>O<sub>2</sub><sup>-</sup> (M-H)<sup>-</sup> 330.25139, found 330.25140.

LHN-4-41 #12 RT: 0.13 AV: 1 NL: 4.30E5  
 T: FTMS - p ESI Full ms [50.0000-750.0000]

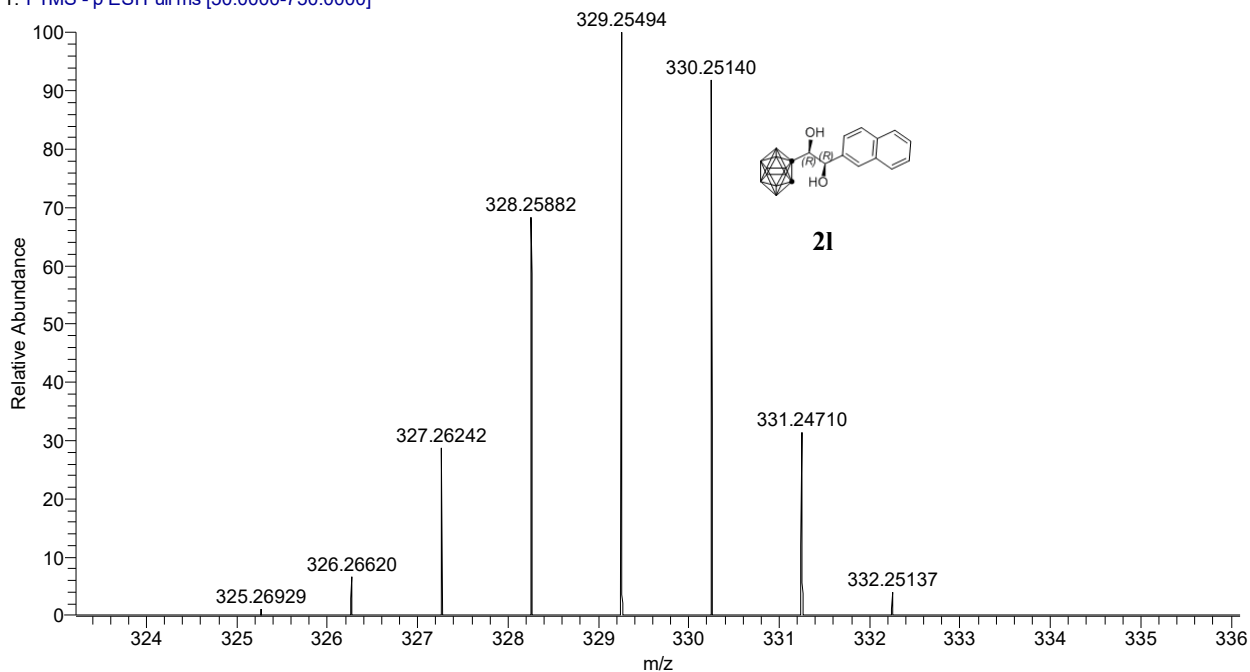

LHN-3748A 1H NMR in CDCl<sub>3</sub> 300M

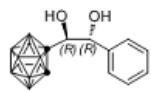

2a'

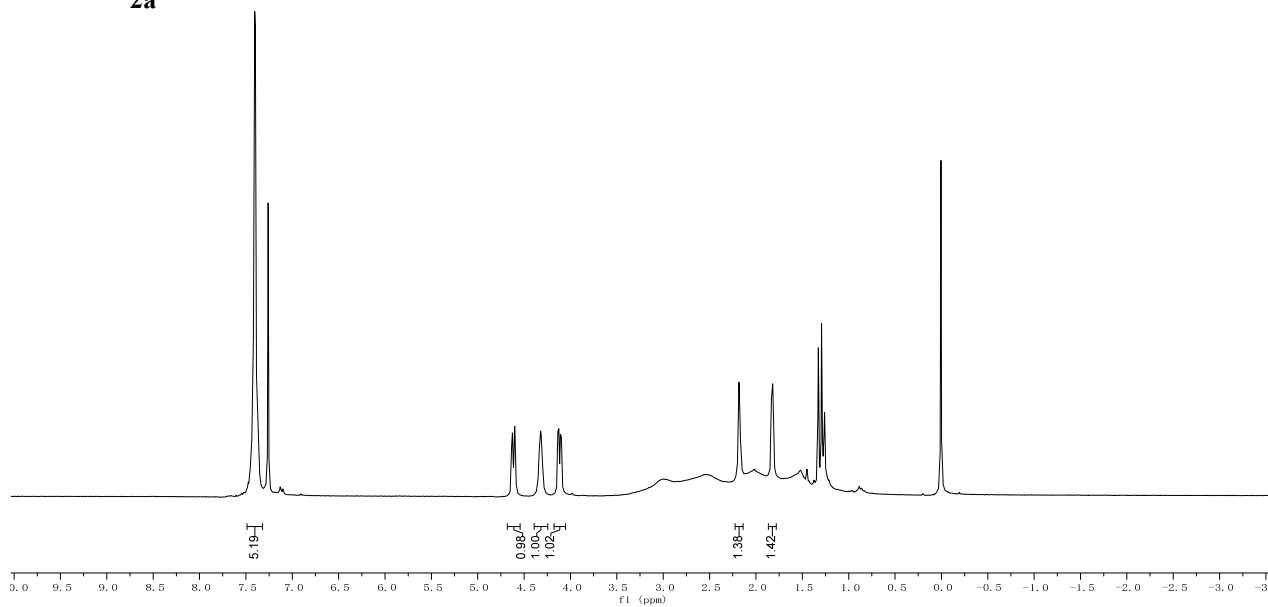

LHN-3-78A 13C NMR in CDCl<sub>3</sub> 75M

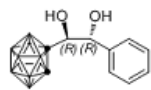

2a'

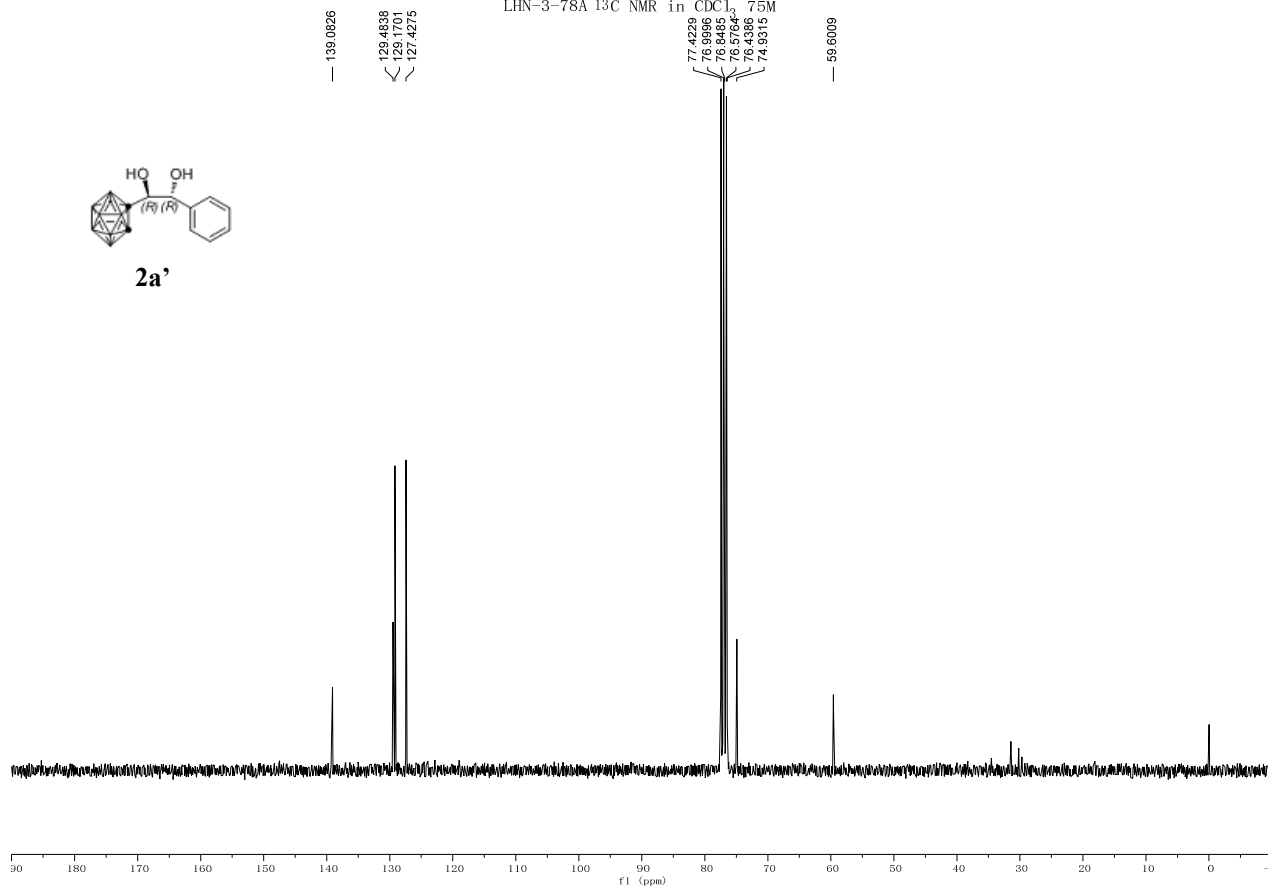

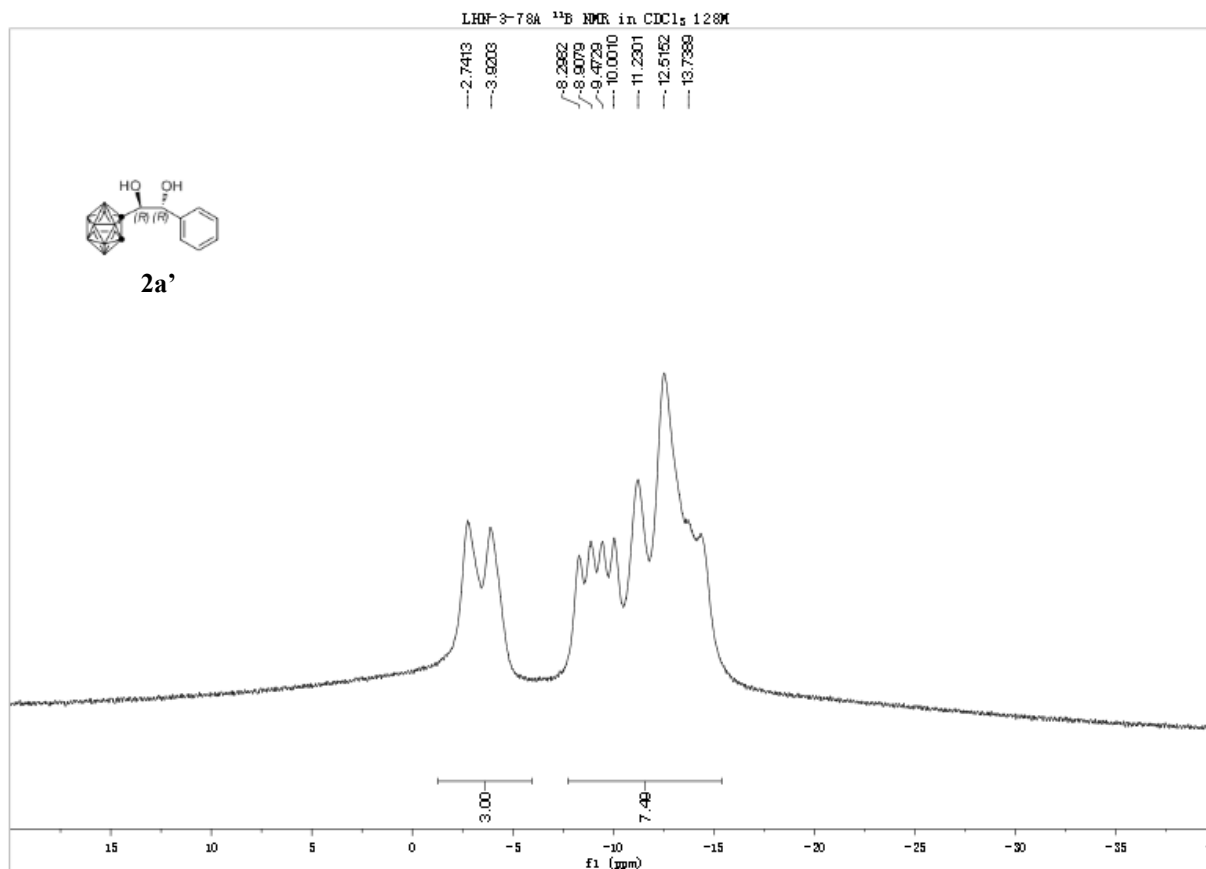

LHN-3-78A. HRMS (ESI)  $m/z$  calcd for  $C_{10}H_{19}B_{10}O_2^-$  (M-H)<sup>-</sup> 280.23574, found 280.23593.

LHN-3-78A #12 RT: 0.13 AV: 1 NL: 1.46E6  
T: FTMS - p ESI Full ms [50.0000-750.0000]

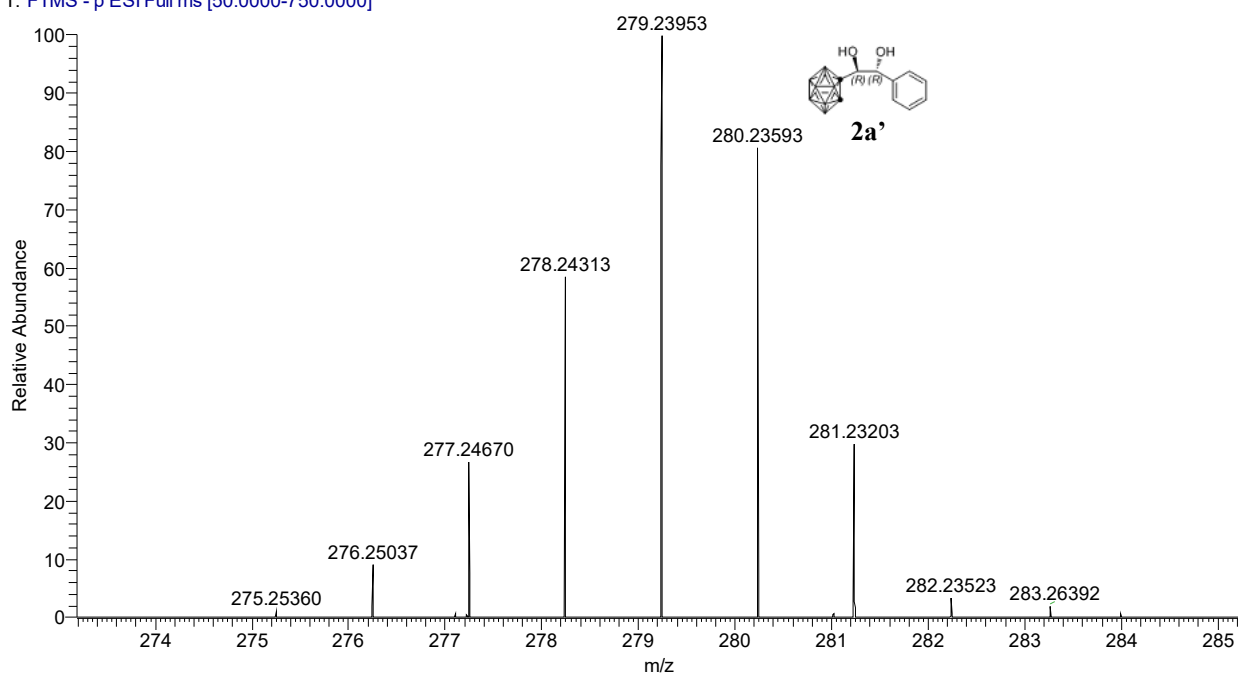

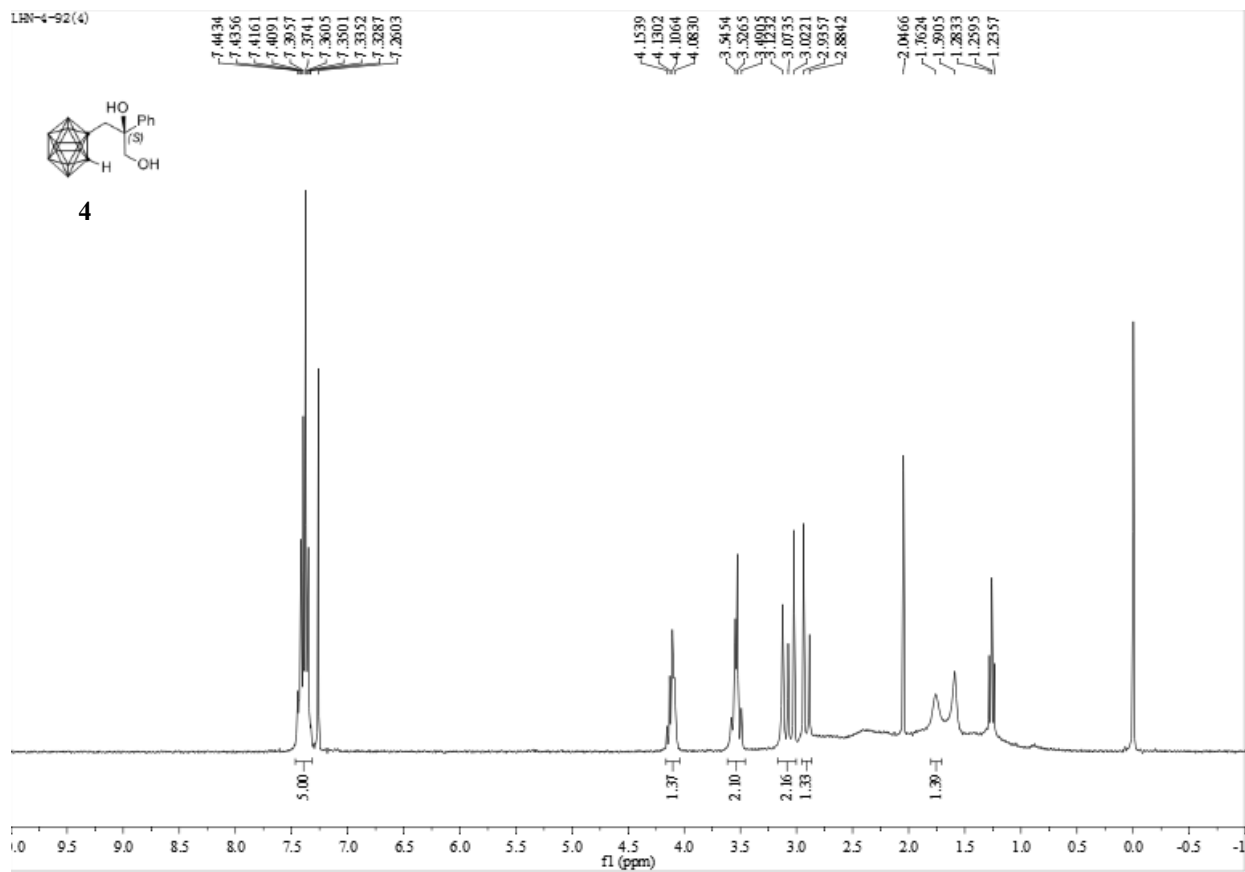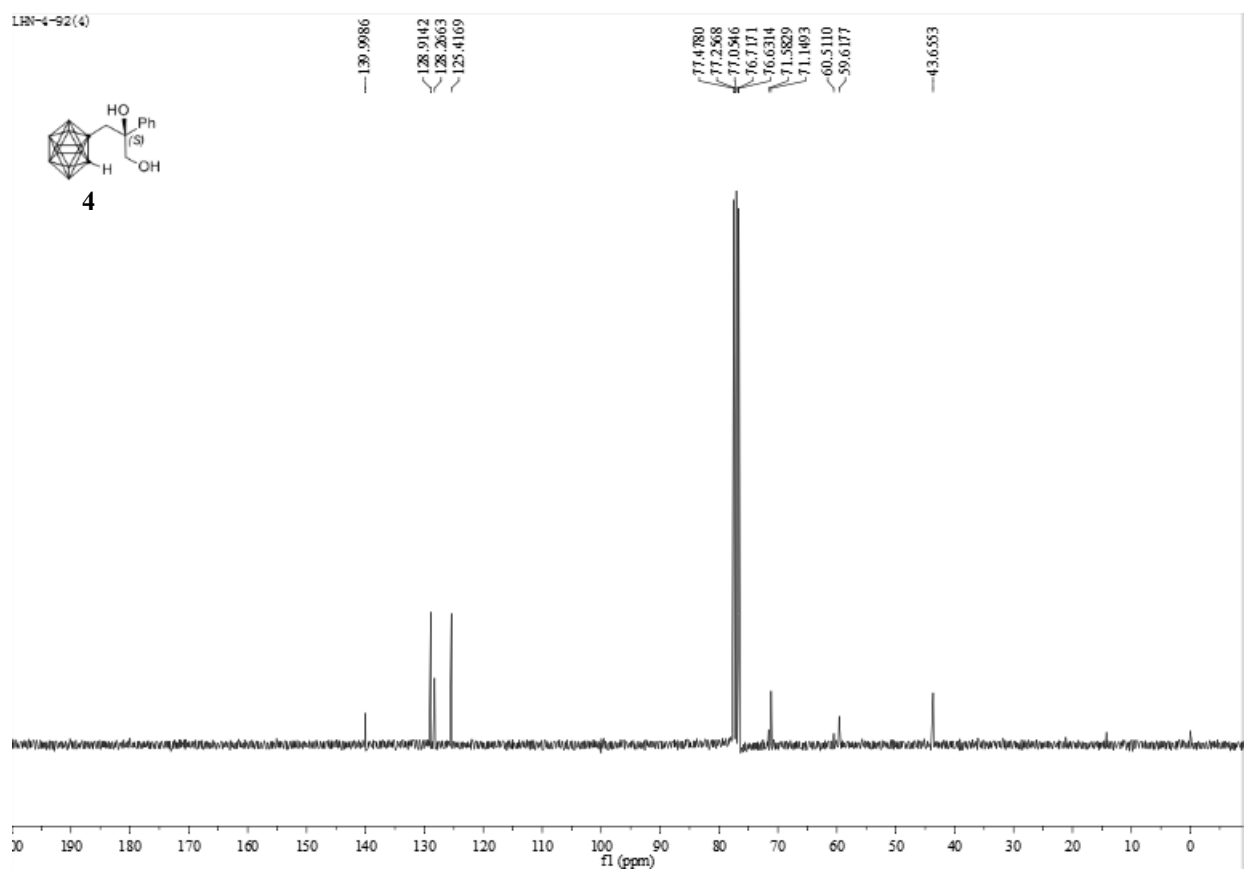

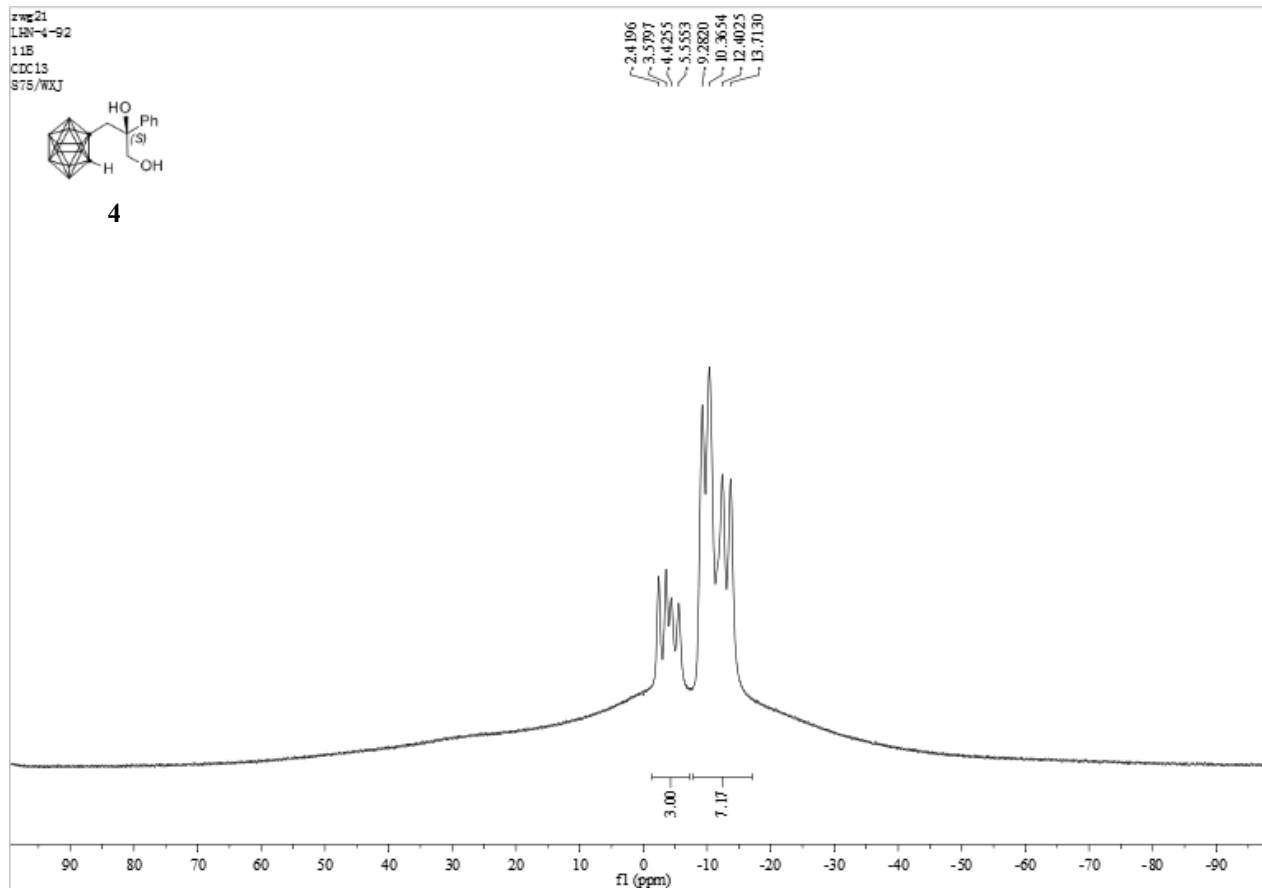

4. HRMS (ESI)  $m/z$  calcd for  $C_{11}H_{21}B_{10}O_2^-$  (M-H)<sup>-</sup> 294.25139, found 294.25165.

5-LHN-4-92 #12 RT: 0.09 AV: 1 NL: 1.39E8  
 T: FTMS - p ESI Full ms [80.0000-1200.0000]

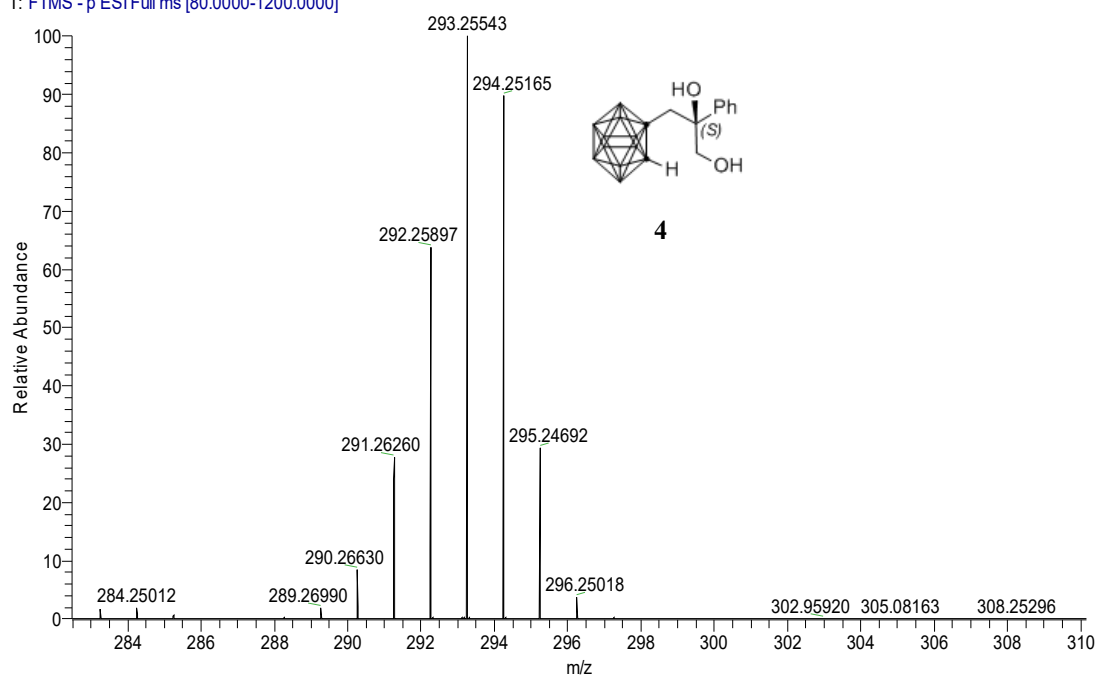

LHN-4-29 1H NMR in CDCl<sub>3</sub> 300M

7.4073  
7.2699

4.9103  
4.8834  
4.4028  
4.3760  
4.0817

1.5054

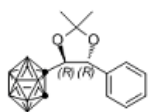

6

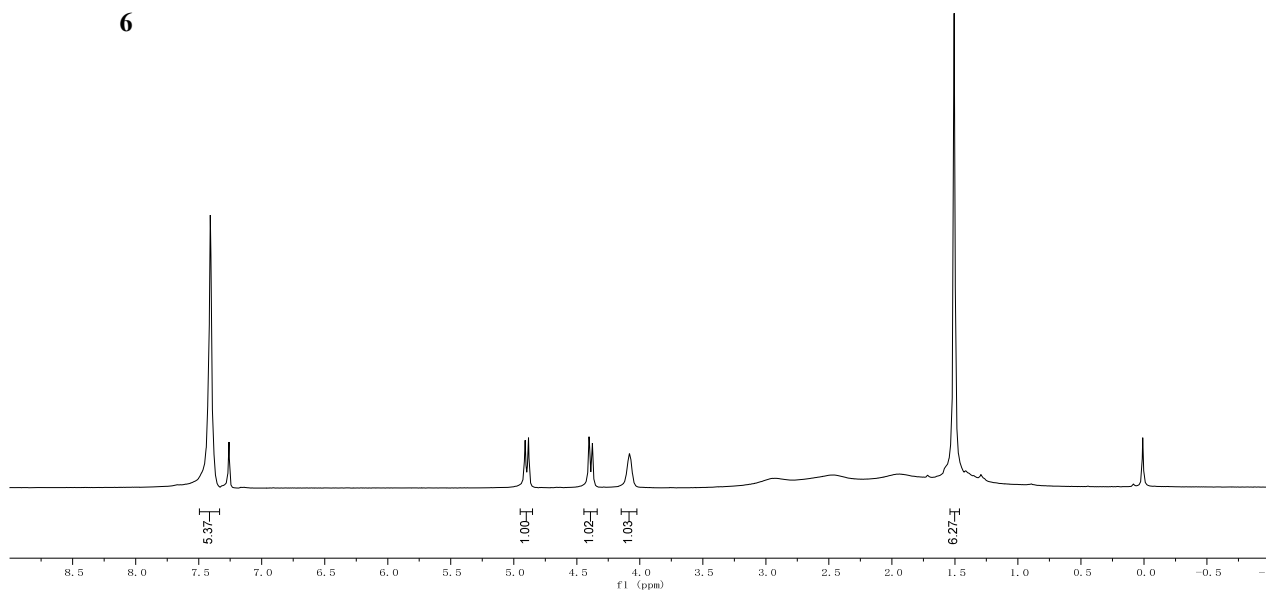

LHN-4-29 13C NMR in CDCl<sub>3</sub> 75M

135.0143  
128.3291  
128.7881  
128.2031

110.6305

82.9803  
81.0986  
77.4401  
76.0673  
73.2513

60.0278

27.3563  
26.7834

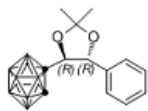

6

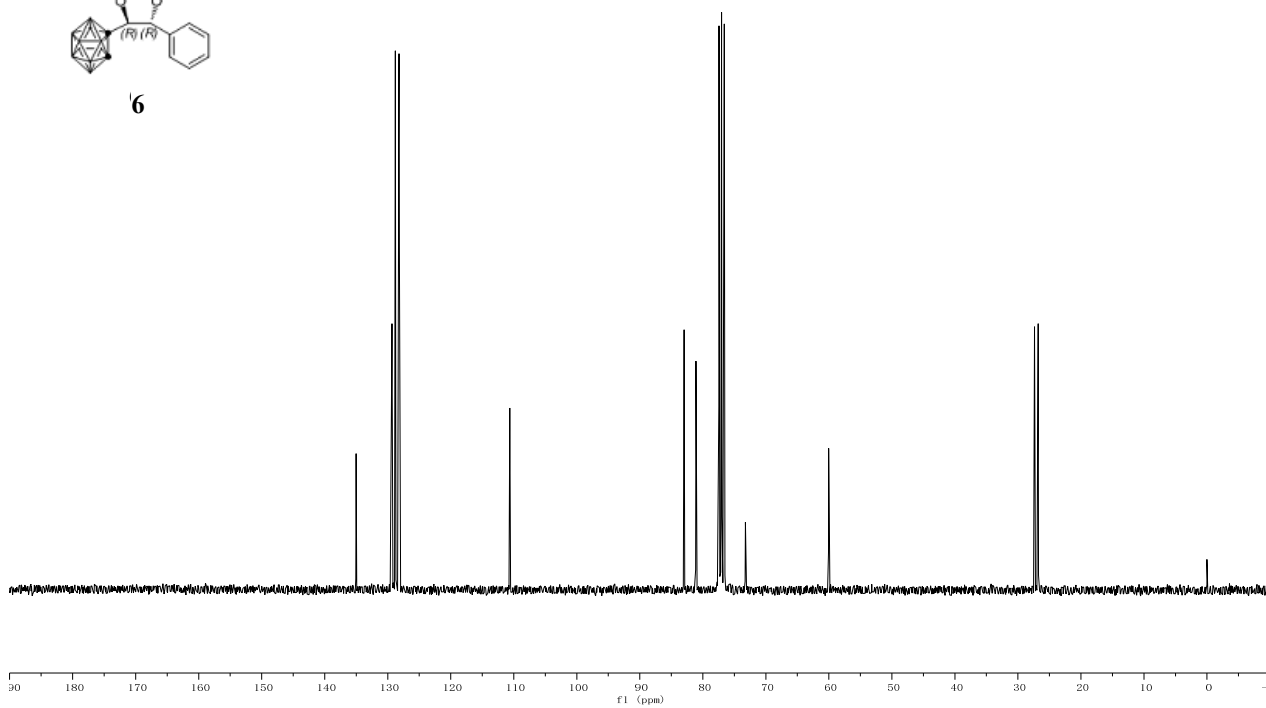

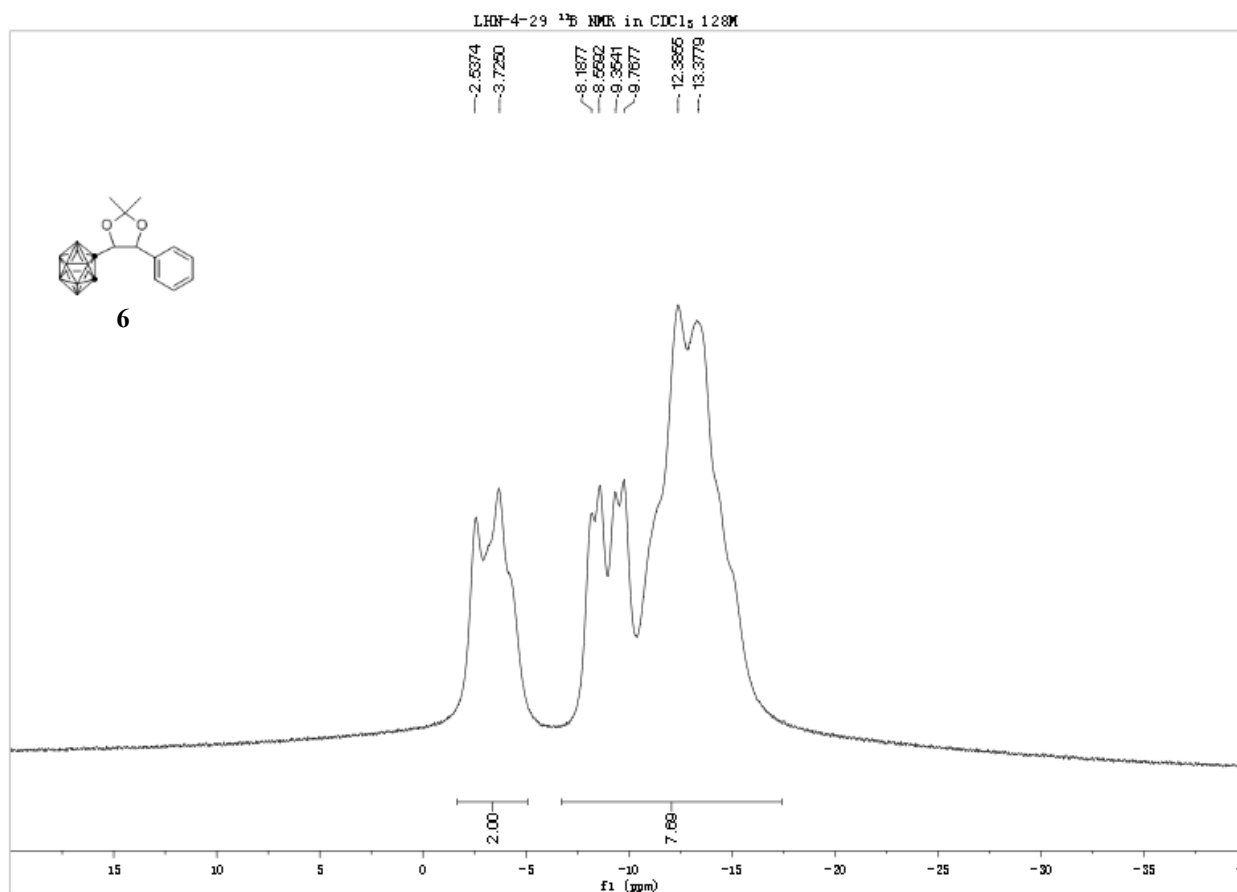

LHN-4-29. HRMS (ESI)  $m/z$  calcd for  $\text{C}_{13}\text{H}_{23}\text{B}_{10}\text{O}_2^-$  (M-H) $^-$  321.26341, found 321.26352.

LHN-4-29 #10 RT: 0.11 AV: 1 NL: 1.15E7  
T: FTMS - p ESI Full ms [50.0000-750.0000]

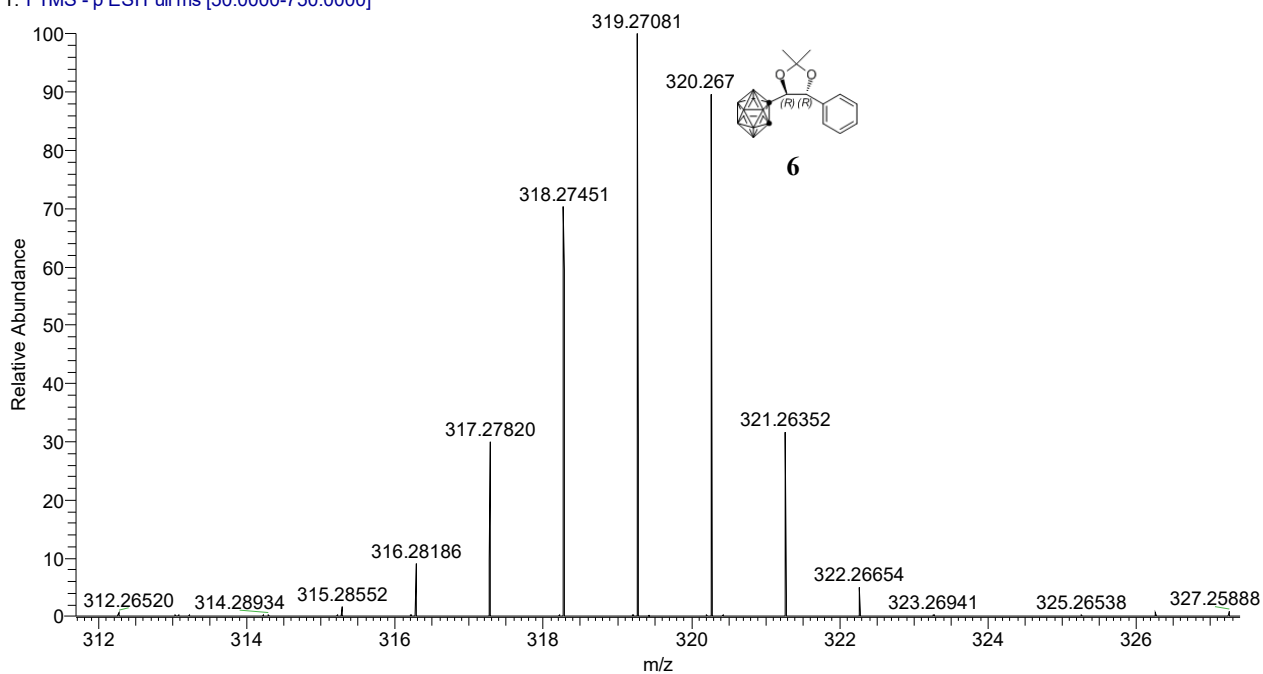



DHX-6-8. 1. fid

7.5469  
7.5374  
7.5240  
7.5127  
7.5052

5.8287  
5.8010  
5.3532  
5.3255

DHX-6-8 1H NMR in CDCl<sub>3</sub> 300M

4.0535

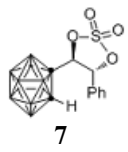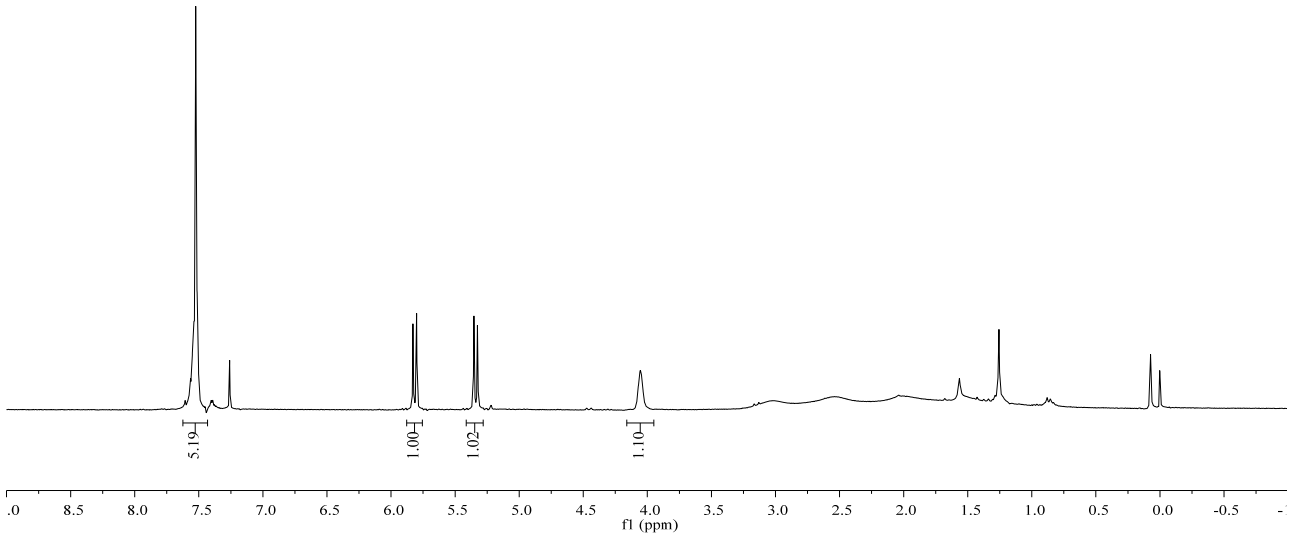

DHX-6-8-C. 1. fid

131.8063  
129.9070  
129.7030  
128.6397

DHX-6-8 13C NMR in CDCl<sub>3</sub> 75M

87.2359  
83.7510

69.3529

59.9746

29.6775

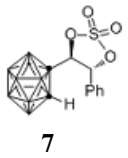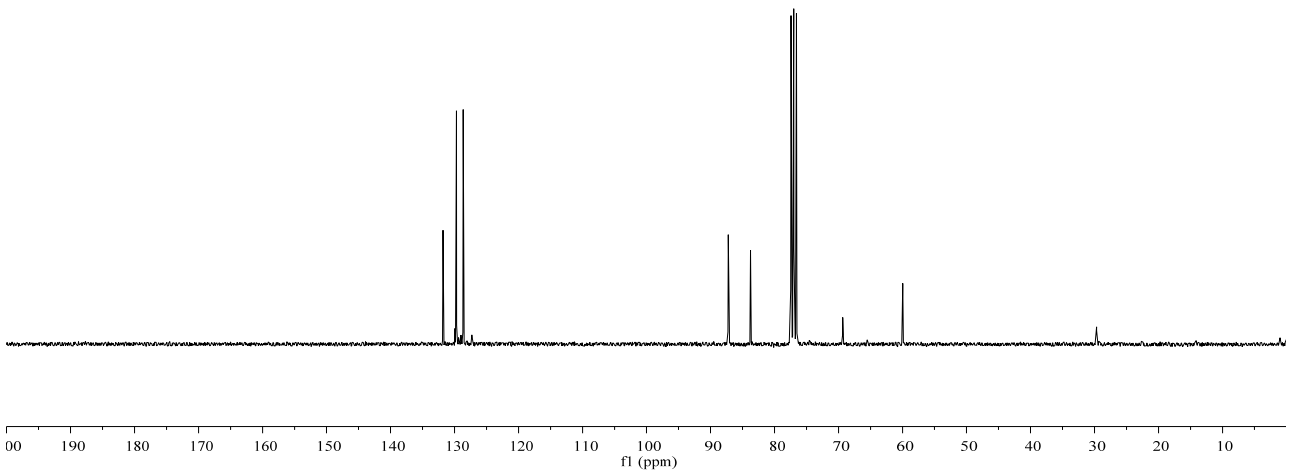

DHX-6-8  
11B  
CDCl3  
1568/WXJ

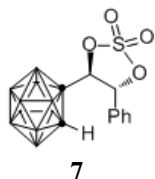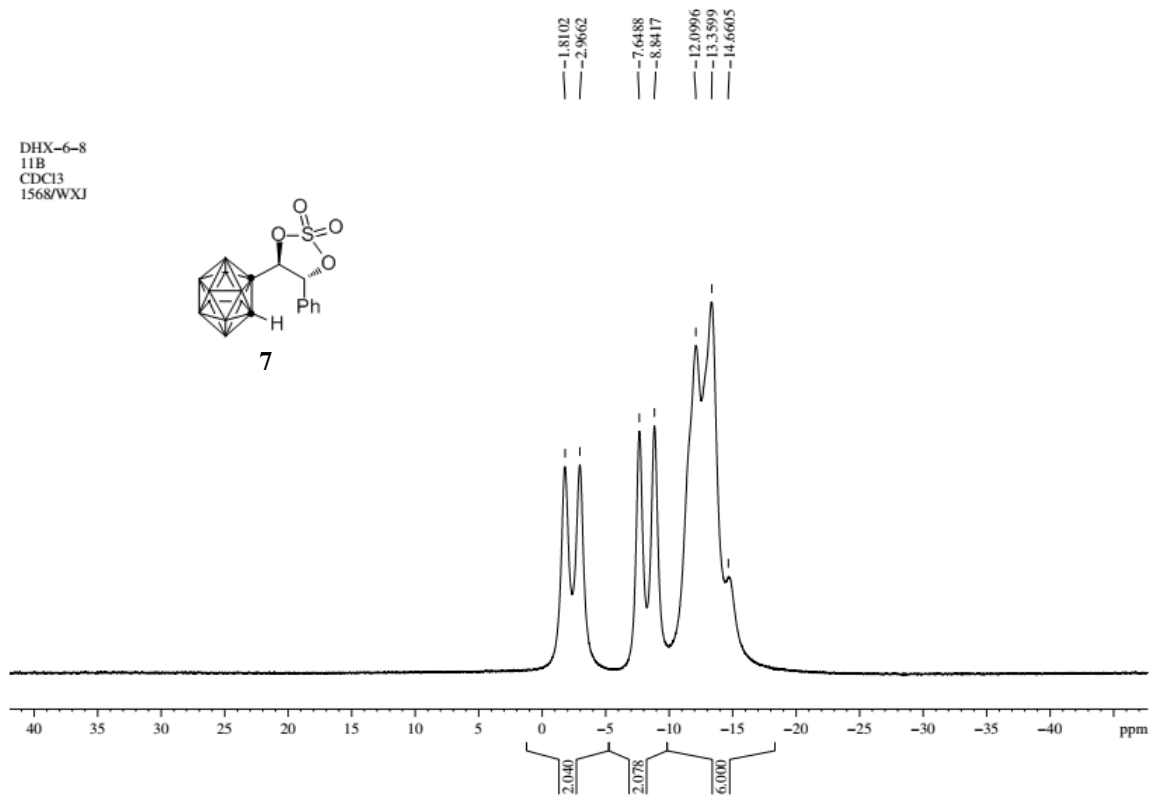

DHX-6-8. HRMS (ESI)  $m/z$  calcd for  $C_{10}H_{17}B_{10}O_4S^-$  (M-H)<sup>-</sup> 342.1820, found 342.1854.

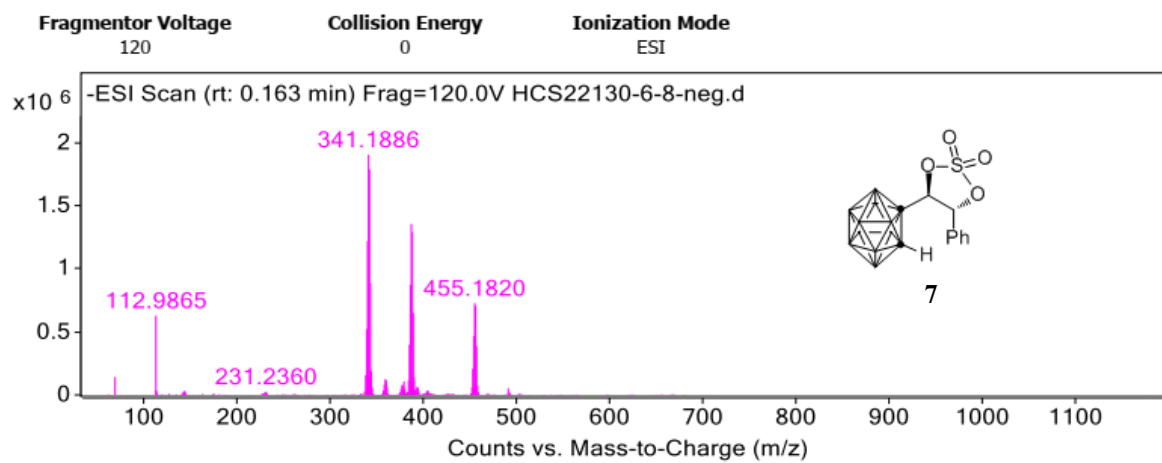

Peak List

| $m/z$    | $z$ | Abund      |
|----------|-----|------------|
| 112.9865 |     | 629575.38  |
| 339.1957 |     | 522686.28  |
| 340.1918 |     | 1220399.75 |
| 341.1886 |     | 1906339.88 |
| 342.1854 |     | 1790748.75 |
| 343.183  | 1   | 886873.75  |

DHX-6-10-MEOD. 1. f3  
7.5138  
7.4908  
7.4307  
7.4213  
7.4012  
7.3785  
7.3583

DHX-6-10 1H NMR in MeOD-d<sub>4</sub> 300M  
5.1716  
5.1552  
5.1000  
5.0834  
4.7426

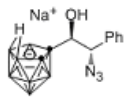

8

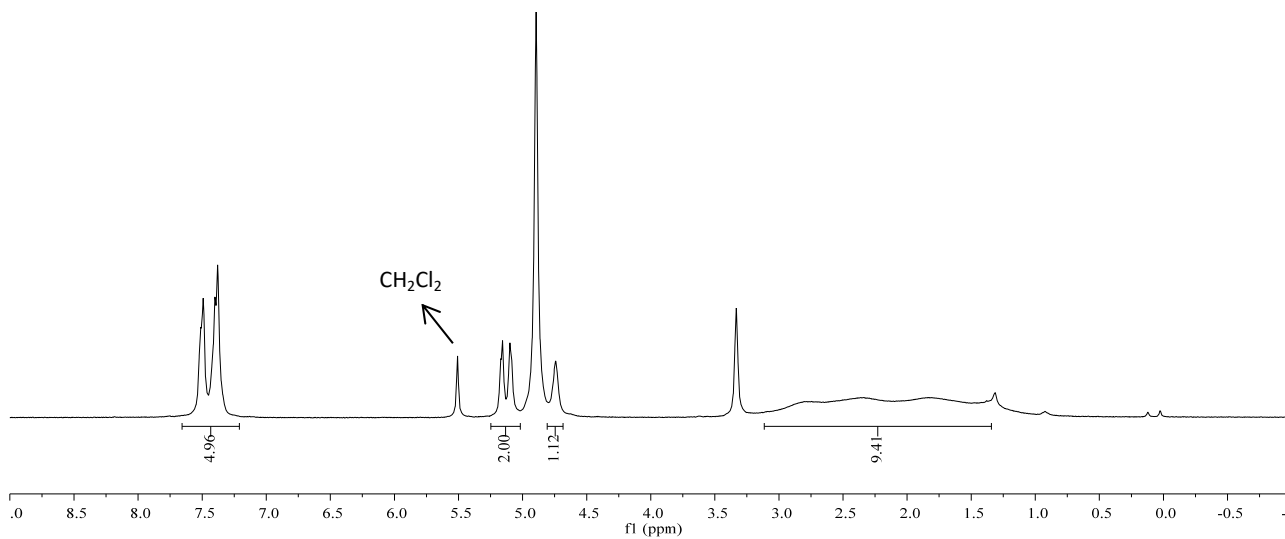

DHX-6-10-MEOD-C. 2. fid

134.3099  
128.5086  
128.2802  
128.0011

79.5386  
74.7702  
67.3028  
61.1953

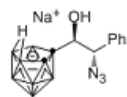

8

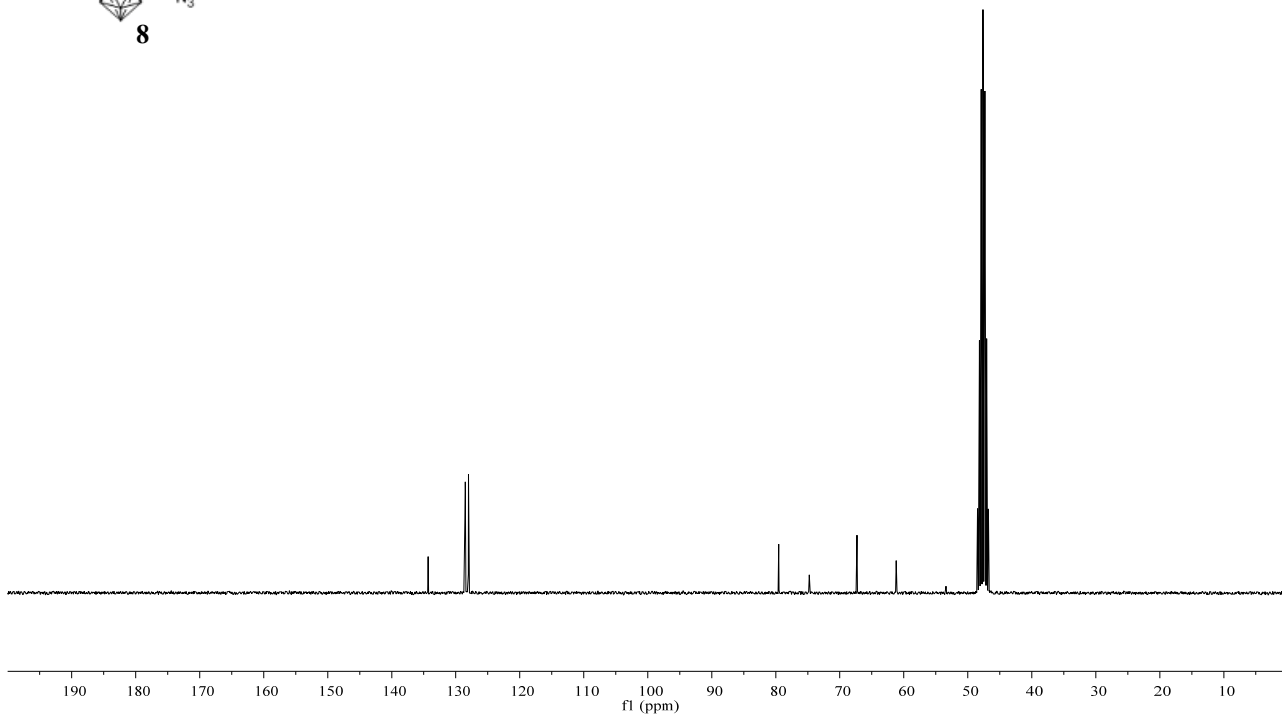

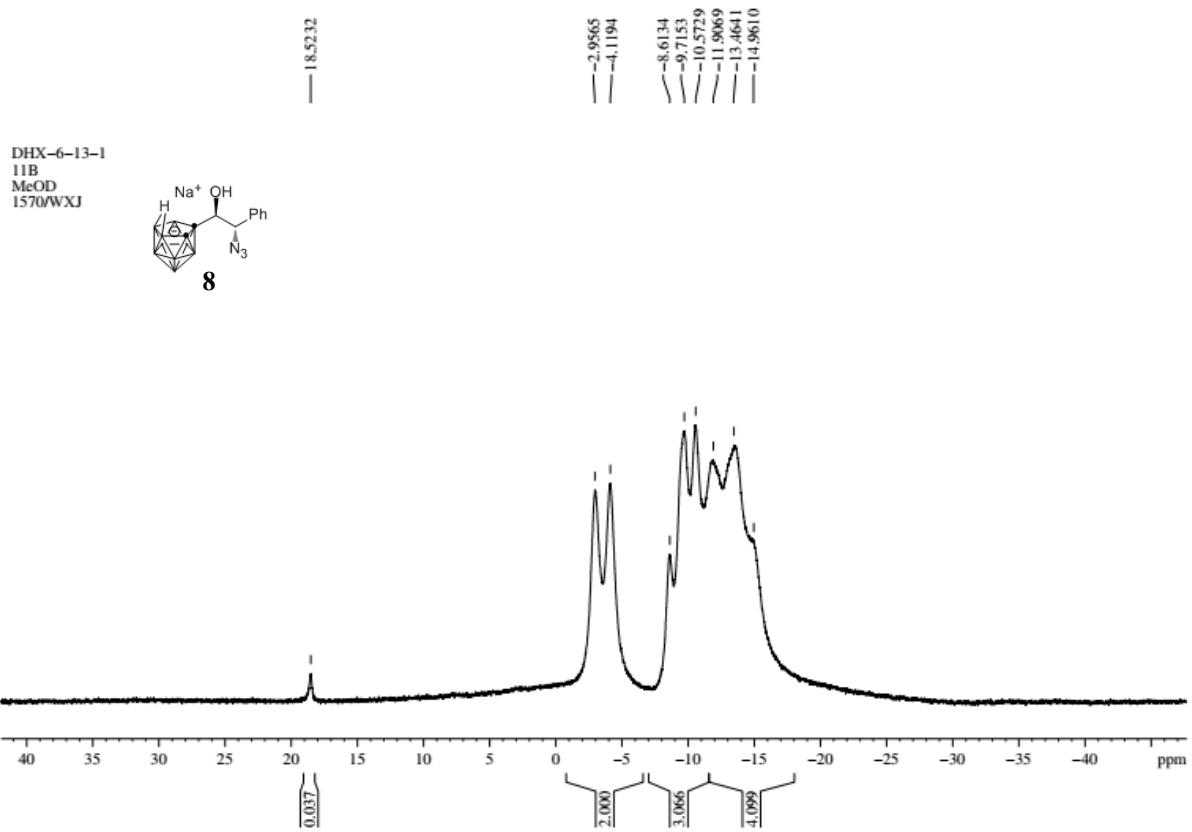

DHX-6-10 HRMS (ESI)  $m/z$  calcd for  $C_{10}H_{19}B_9N_3ONa$  (M-Na)<sup>-</sup> 295.24074, found 295.24011.

119-3 #14 RT: 0.10 AV: 1 NL: 1.42E6  
T: FTMS - p ESI Full ms [80.0000-1200.0000]

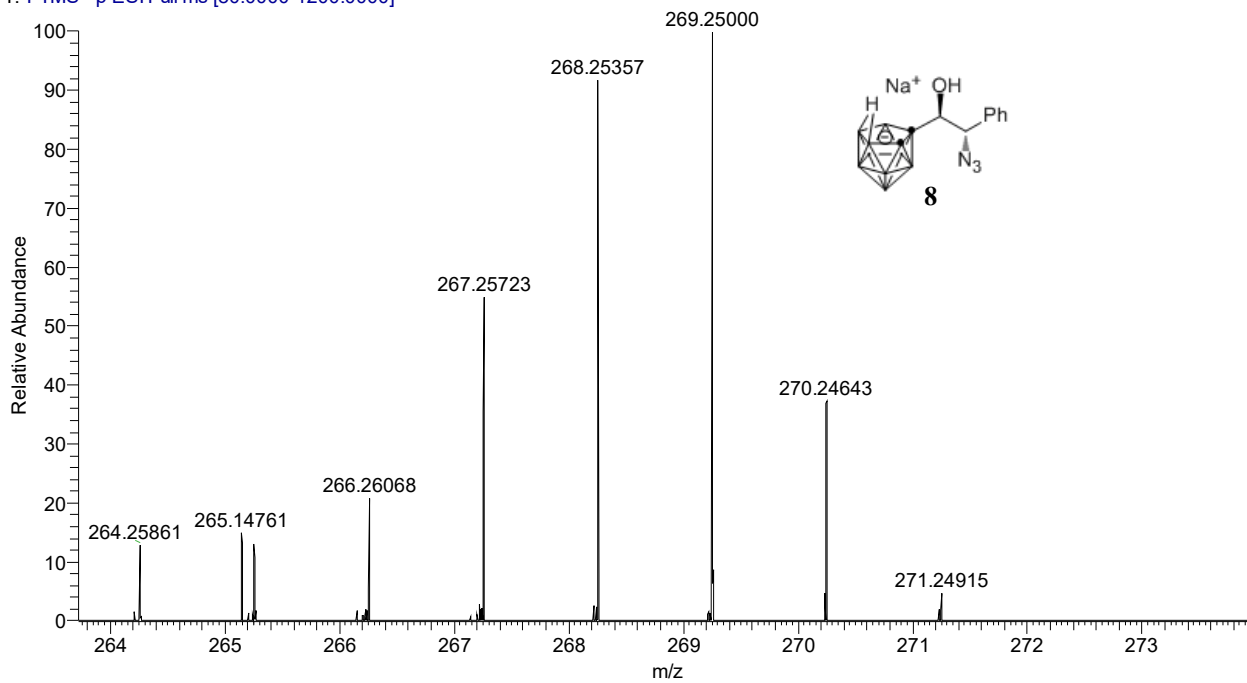

6-16-HCL-6.3.fid

DHX-6-16 1H NMR in MeOD-d<sub>4</sub> 300M

7.7688  
7.7629  
7.7451  
7.7373  
7.4904  
7.4676

5.4392

4.6951  
4.6884

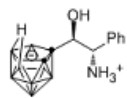

9

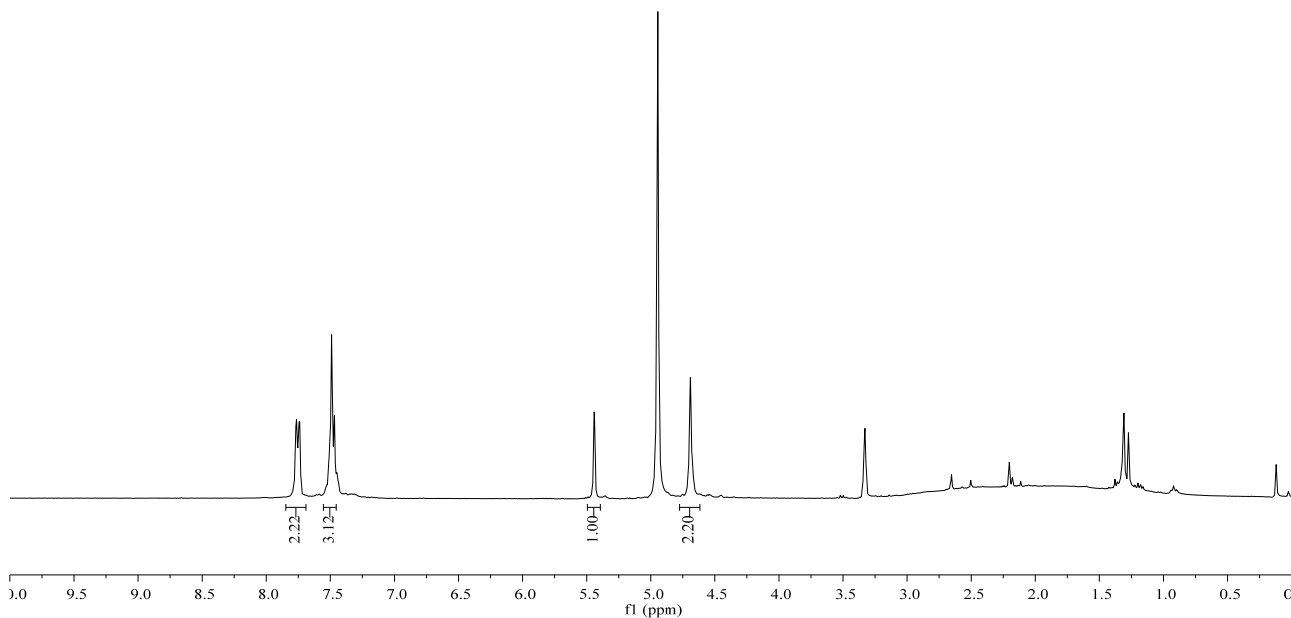

DHX-6-16-HCL-2-C/3h

DHX-6-16 13C NMR in MeOD-d<sub>4</sub> 75M

131.1038  
129.9555  
128.4842

76.3559  
74.0285

60.5793  
56.6985

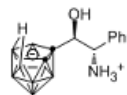

9

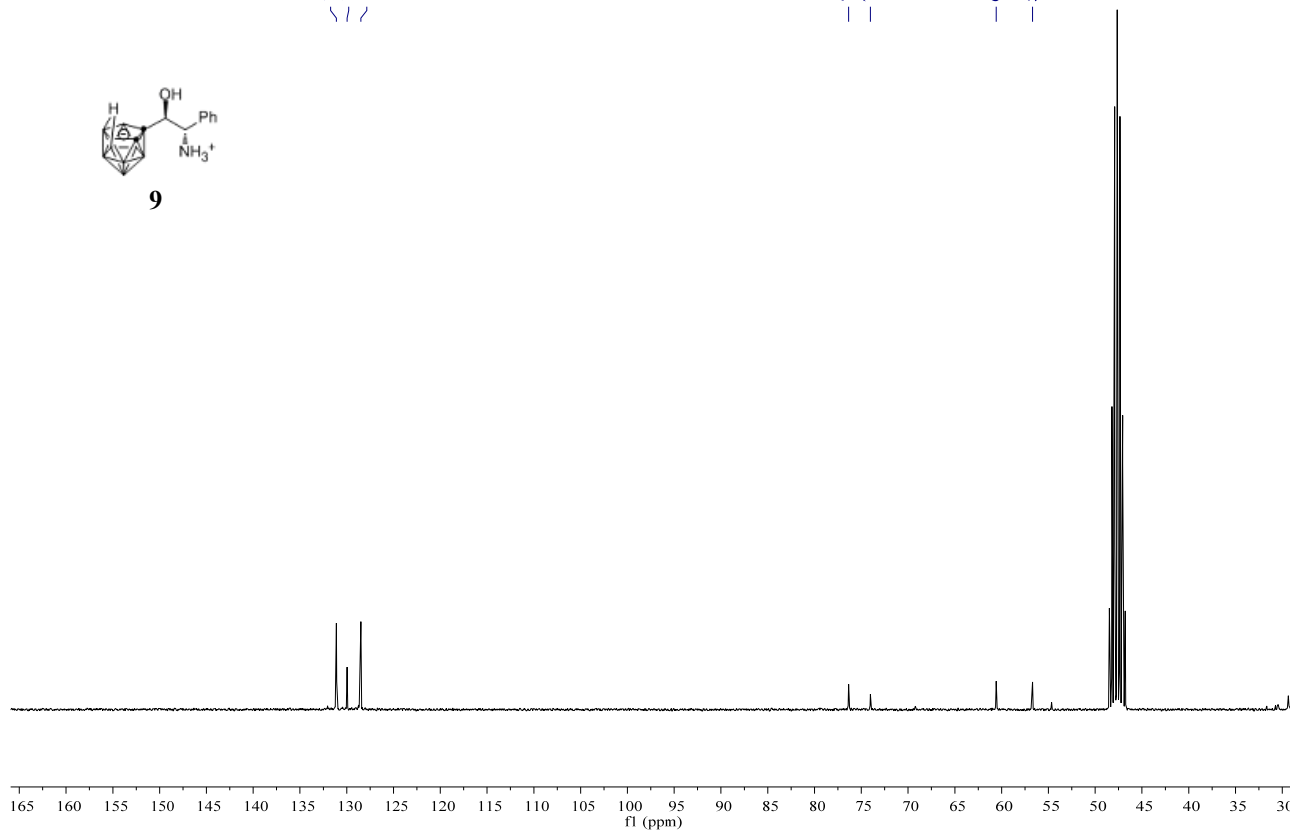

-2.2393  
 -3.4143  
 -9.1650  
 -10.3353  
 -12.8098  
 -14.5299

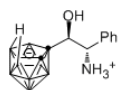**9**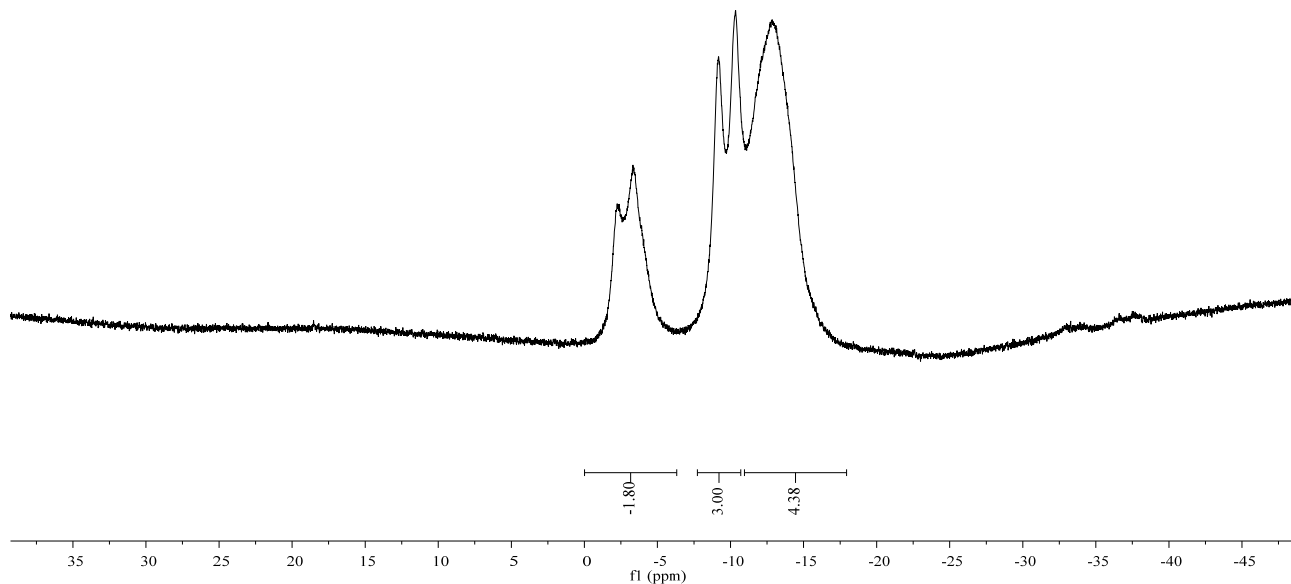

**DHX-6-15-1.** HRMS (ESI)  $m/z$  calcd for  $C_{10}H_{21}B_9NO^+$  (M) 269.25024, found 269.25000.

119-3 #14 RT: 0.10 AV: 1 NL: 1.42E6  
 T: FTMS - p ESI Full ms [80.0000-1200.0000]

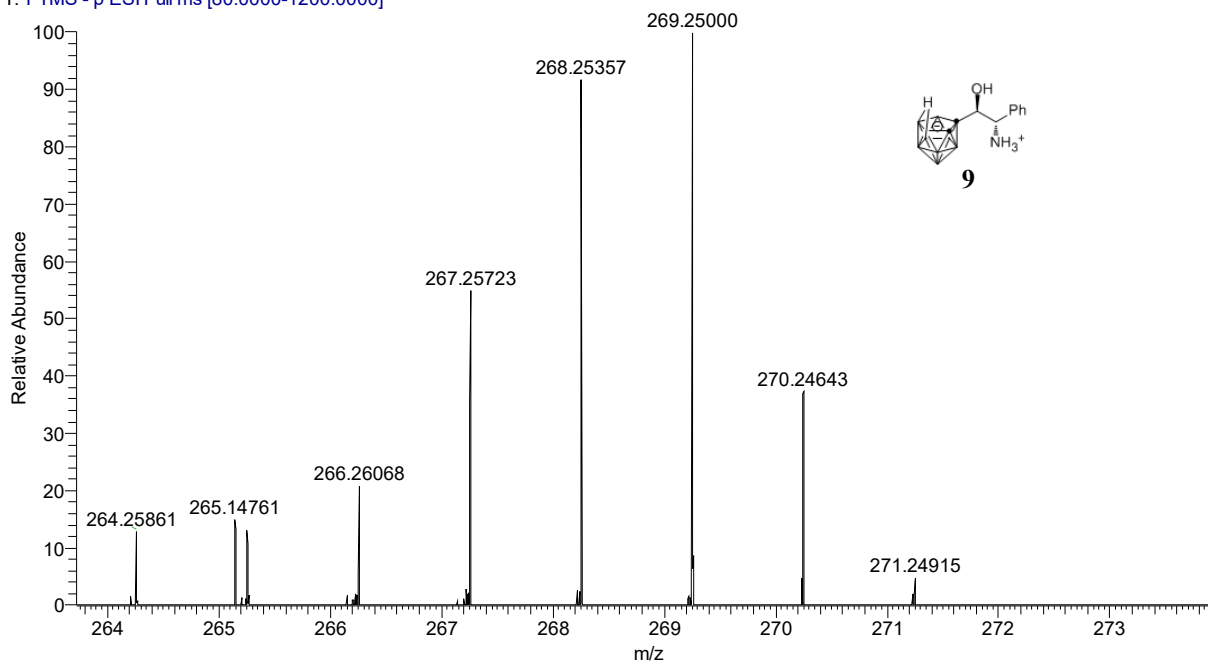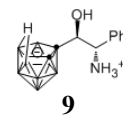**9**

HPLC for racemic and pure enantioenriched sample 2a

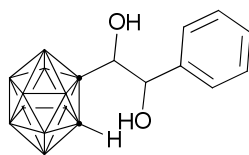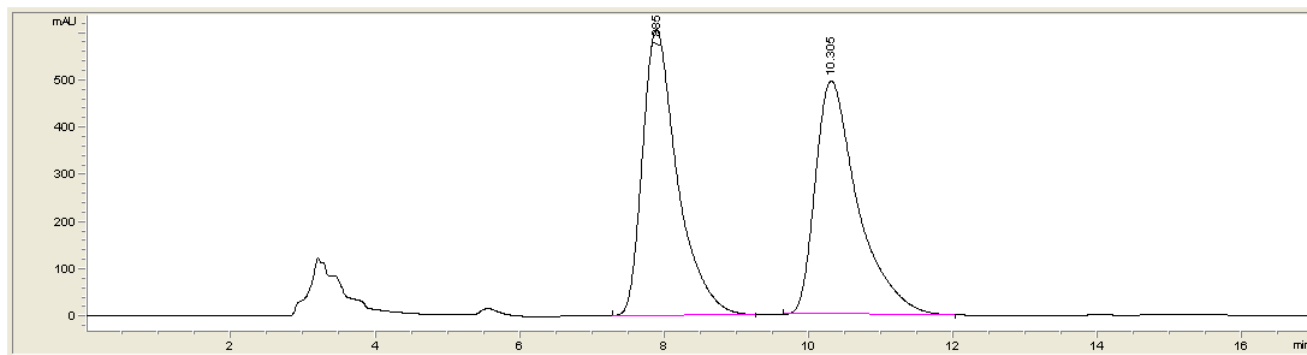

| 峰 # | 保留时间 [min] | 类型 | 峰宽 [min] | 峰面积 [mAU*s] | 峰高 [mAU]  | 峰面积 %   |
|-----|------------|----|----------|-------------|-----------|---------|
| 1   | 7.885      | BB | 0.5036   | 2.03316e4   | 605.79352 | 50.1314 |
| 2   | 10.305     | BB | 0.6090   | 2.02250e4   | 494.71295 | 49.8686 |

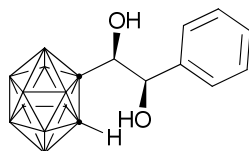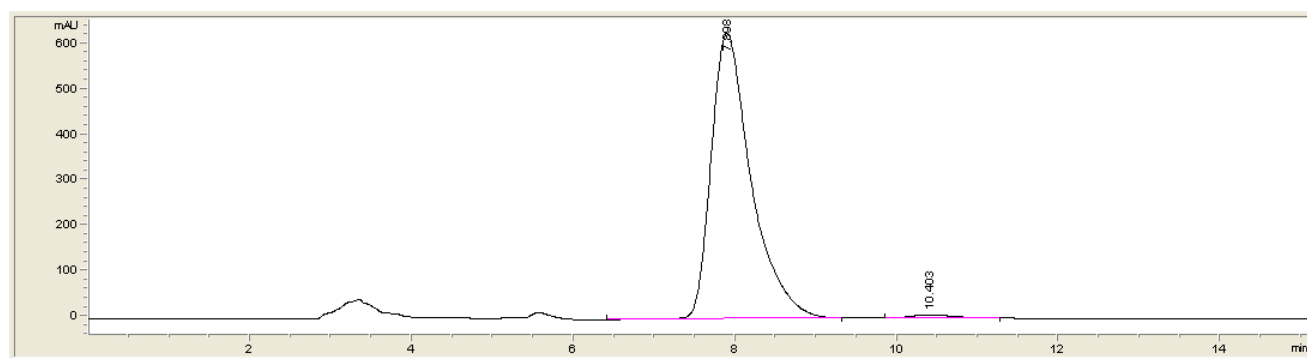

| 峰 # | 保留时间 [min] | 类型 | 峰宽 [min] | 峰面积 [mAU*s] | 峰高 [mAU]  | 峰面积 %   |
|-----|------------|----|----------|-------------|-----------|---------|
| 1   | 7.898      | BB | 0.5170   | 2.17079e4   | 628.43134 | 98.7762 |
| 2   | 10.403     | BB | 0.5495   | 268.94867   | 7.37392   | 1.2238  |

HPLC for racemic and pure enantioenriched sample **2b**

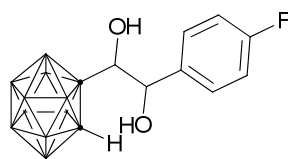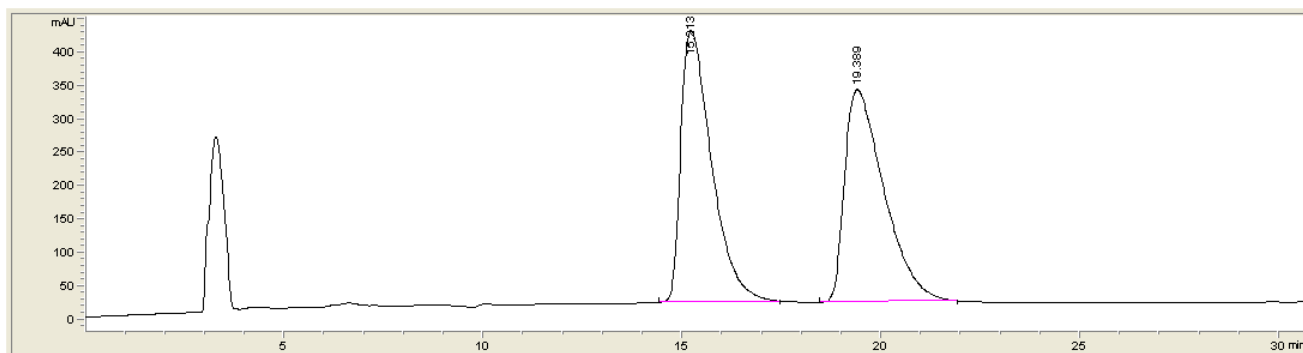

| 峰 # | 保留时间 [min] | 类型 | 峰宽 [min] | 峰面积 [mAU*s] | 峰高 [mAU]  | 峰面积 %   |
|-----|------------|----|----------|-------------|-----------|---------|
| 1   | 15.213     | BB | 0.8156   | 2.18395e4   | 407.29001 | 49.9054 |
| 2   | 19.389     | BB | 1.0548   | 2.19223e4   | 318.60016 | 50.0946 |

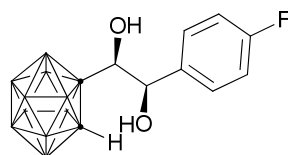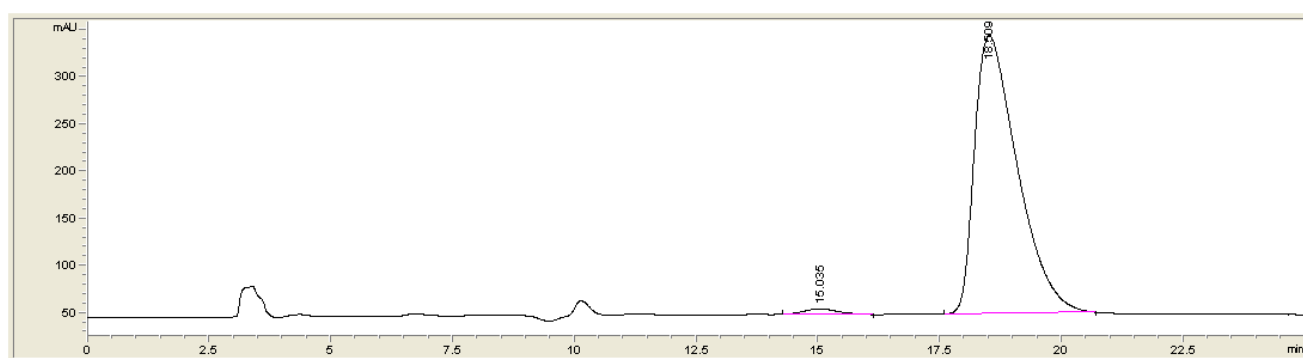

| 峰 # | 保留时间 [min] | 类型 | 峰宽 [min] | 峰面积 [mAU*s] | 峰高 [mAU]  | 峰面积 %   |
|-----|------------|----|----------|-------------|-----------|---------|
| 1   | 15.035     | BB | 0.6986   | 294.74872   | 5.94304   | 1.6004  |
| 2   | 18.509     | BB | 0.9177   | 1.81229e4   | 295.40921 | 98.3996 |



HPLC for racemic and pure enantioenriched sample 2c

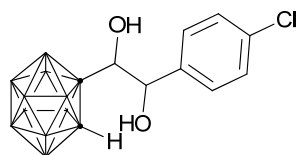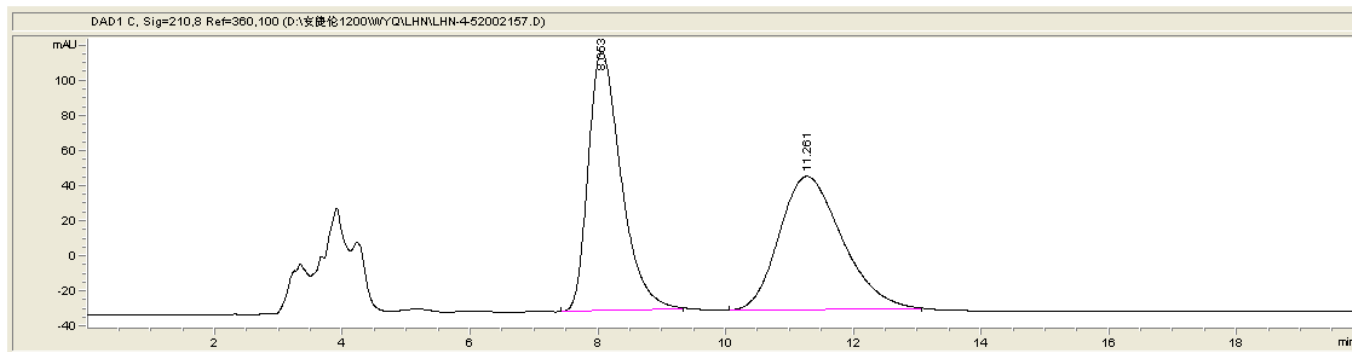

| 峰 # | 保留时间 [min] | 类型 | 峰宽 [min] | 峰面积 [mAU*s] | 峰高 [mAU]  | 峰面积 %   |
|-----|------------|----|----------|-------------|-----------|---------|
| 1   | 8.053      | BB | 0.5446   | 5274.15186  | 147.70303 | 50.3873 |
| 2   | 11.261     | BB | 1.0439   | 5193.07520  | 75.92722  | 49.6127 |

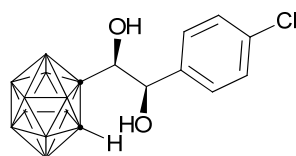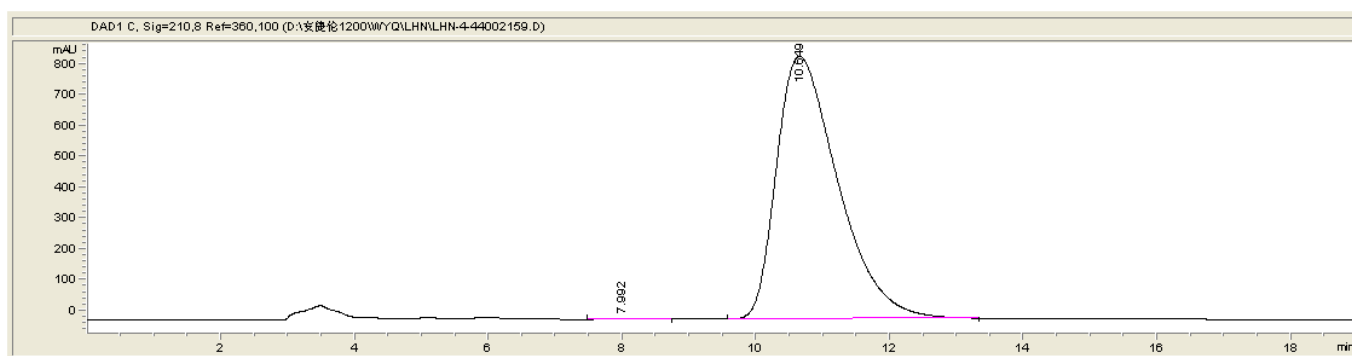

| 峰 # | 保留时间 [min] | 类型 | 峰宽 [min] | 峰面积 [mAU*s] | 峰高 [mAU]  | 峰面积 %   |
|-----|------------|----|----------|-------------|-----------|---------|
| 1   | 7.992      | BB | 0.4492   | 104.77180   | 3.27511   | 0.1923  |
| 2   | 10.649     | BB | 0.9753   | 5.43894e4   | 851.42664 | 99.8077 |

HPLC for racemic and pure enantioenriched sample 2d

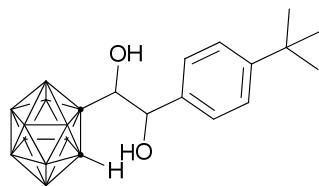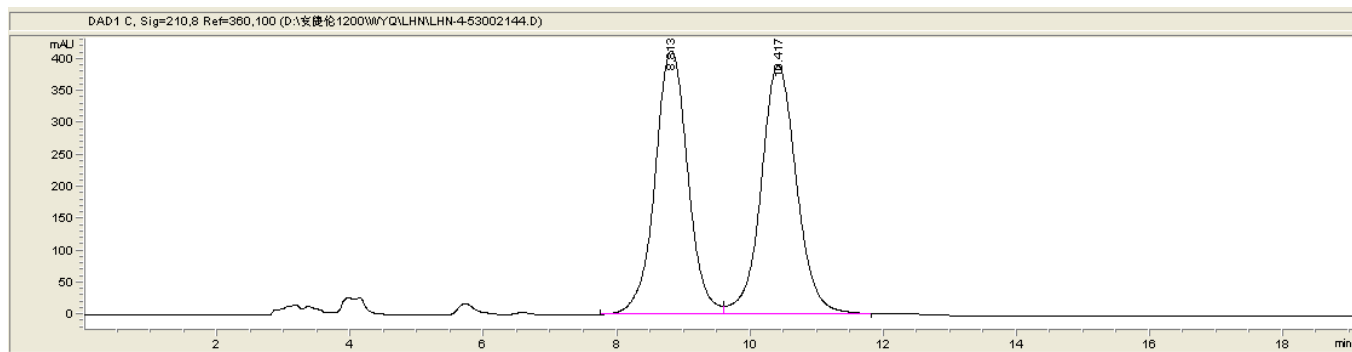

| 峰 # | 保留时间 [min] | 类型 | 峰宽 [min] | 峰面积 [mAU*s] | 峰高 [mAU]  | 峰面积 %   |
|-----|------------|----|----------|-------------|-----------|---------|
| 1   | 8.813      | BV | 0.5330   | 1.41680e4   | 412.16479 | 49.5783 |
| 2   | 10.417     | VB | 0.5698   | 1.44091e4   | 389.31464 | 50.4217 |

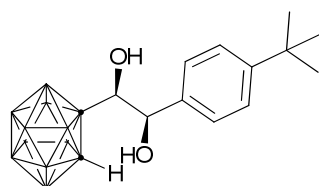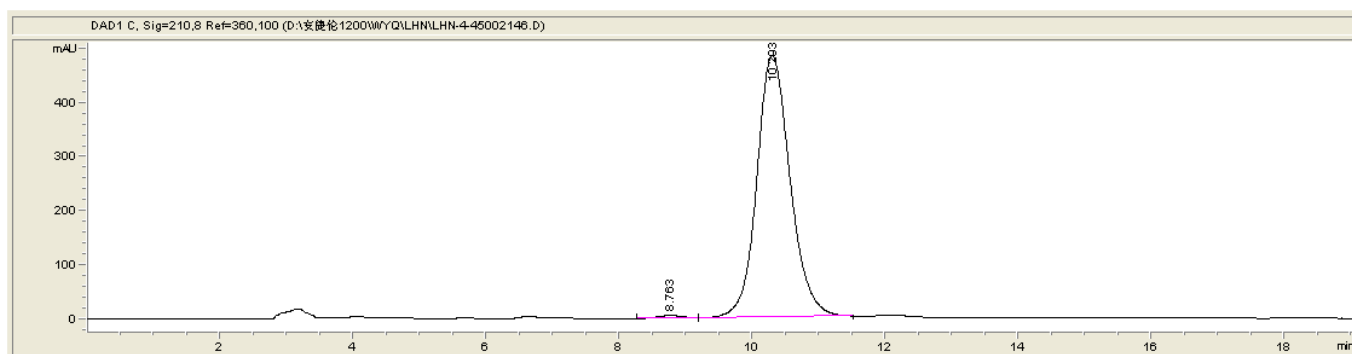

| 峰 # | 保留时间 [min] | 类型 | 峰宽 [min] | 峰面积 [mAU*s] | 峰高 [mAU]  | 峰面积 %   |
|-----|------------|----|----------|-------------|-----------|---------|
| 1   | 8.763      | BV | 0.3838   | 116.29890   | 4.68217   | 0.6858  |
| 2   | 10.293     | VB | 0.5344   | 1.68429e4   | 483.54950 | 99.3142 |

HPLC for racemic and pure enantioenriched sample 2e

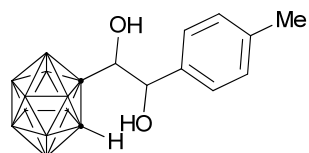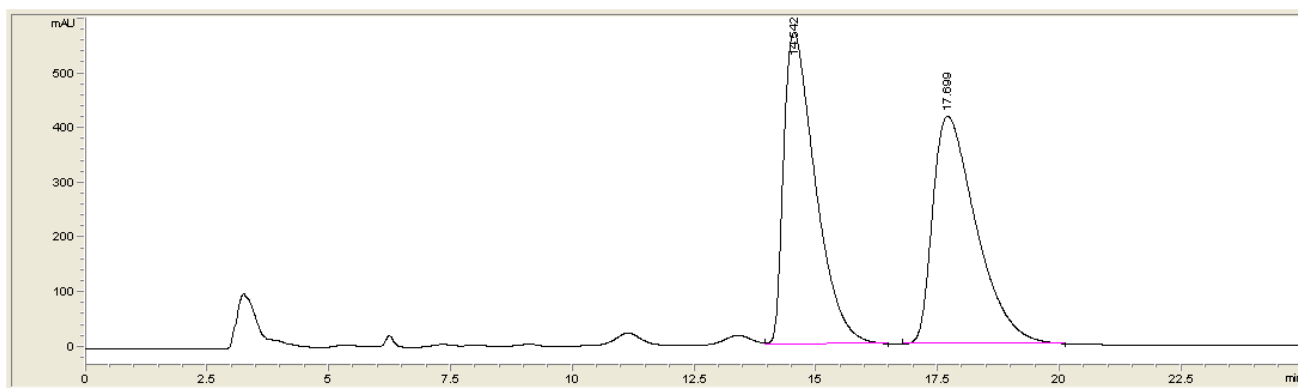

| 峰 # | 保留时间 [min] | 类型 | 峰宽 [min] | 峰面积 [mAU*s] | 峰高 [mAU]  | 峰面积 %   |
|-----|------------|----|----------|-------------|-----------|---------|
| 1   | 14.542     | VB | 0.6910   | 2.59691e4   | 570.52899 | 50.0712 |
| 2   | 17.699     | BB | 0.9512   | 2.58952e4   | 416.59033 | 49.9288 |

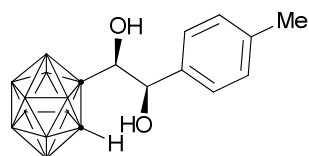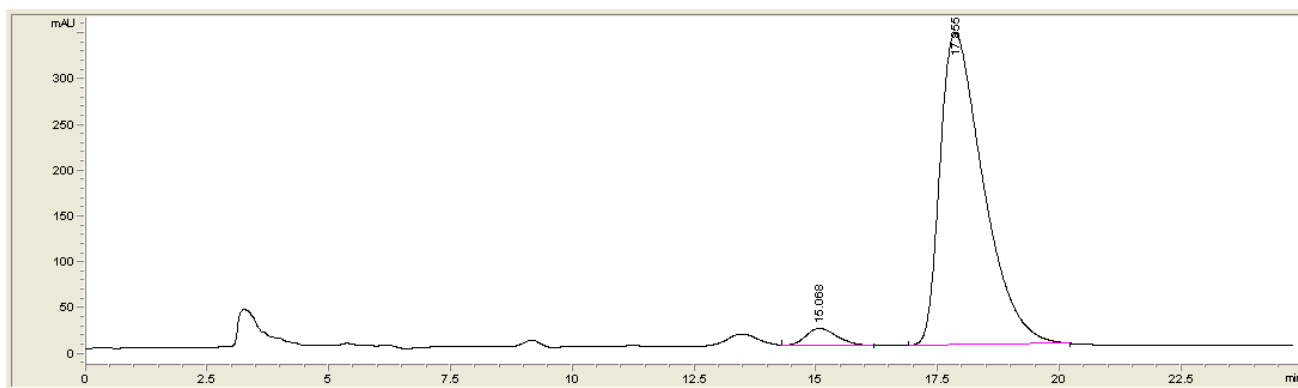

| 峰 # | 保留时间 [min] | 类型 | 峰宽 [min] | 峰面积 [mAU*s] | 峰高 [mAU]  | 峰面积 %   |
|-----|------------|----|----------|-------------|-----------|---------|
| 1   | 15.068     | VB | 0.6903   | 844.27185   | 18.85989  | 3.8551  |
| 2   | 17.855     | BB | 0.9383   | 2.10558e4   | 341.03125 | 96.1449 |

HPLC for racemic and pure enantioenriched sample 2f

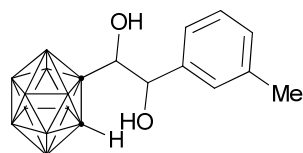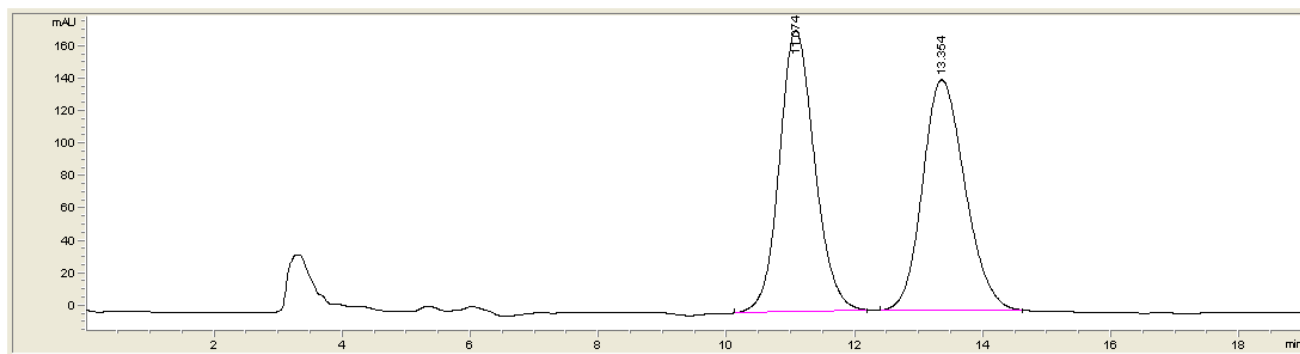

| 峰 # | 保留时间 [min] | 类型 | 峰宽 [min] | 峰面积 [mAU*s] | 峰高 [mAU]  | 峰面积 %   |
|-----|------------|----|----------|-------------|-----------|---------|
| 1   | 11.074     | BB | 0.5855   | 6631.85449  | 173.68483 | 50.3293 |
| 2   | 13.354     | BB | 0.7090   | 6545.06982  | 142.18535 | 49.6707 |

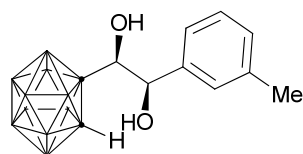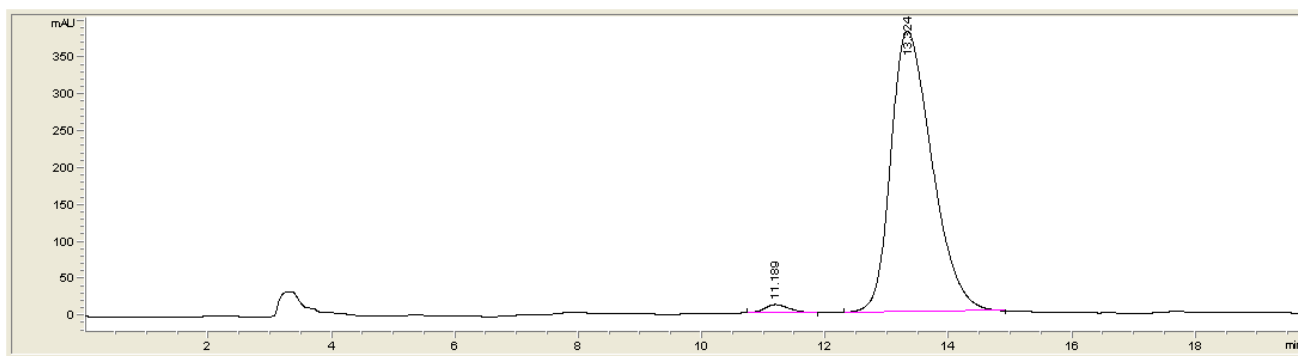

| 峰 # | 保留时间 [min] | 类型 | 峰宽 [min] | 峰面积 [mAU*s] | 峰高 [mAU]  | 峰面积 %   |
|-----|------------|----|----------|-------------|-----------|---------|
| 1   | 11.189     | BB | 0.4168   | 308.29636   | 11.21220  | 1.7138  |
| 2   | 13.324     | BB | 0.7176   | 1.76811e4   | 380.84375 | 98.2862 |

HPLC for racemic and pure enantioenriched sample 2g

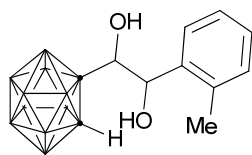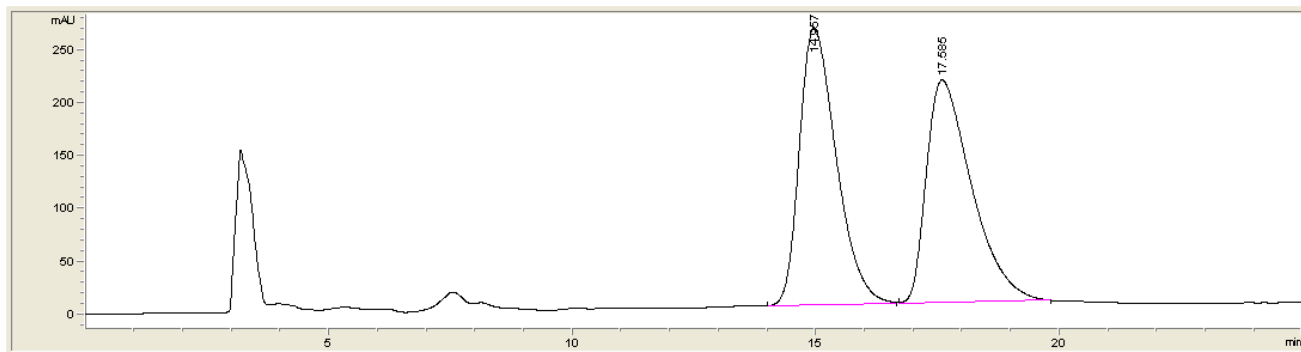

| 峰 # | 保留时间 [min] | 类型 | 峰宽 [min] | 峰面积 [mAU*s] | 峰高 [mAU]  | 峰面积 %   |
|-----|------------|----|----------|-------------|-----------|---------|
| 1   | 14.957     | BB | 0.8141   | 1.38389e4   | 262.06754 | 50.3090 |
| 2   | 17.585     | BB | 0.9763   | 1.36689e4   | 210.84578 | 49.6910 |

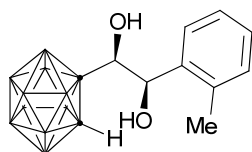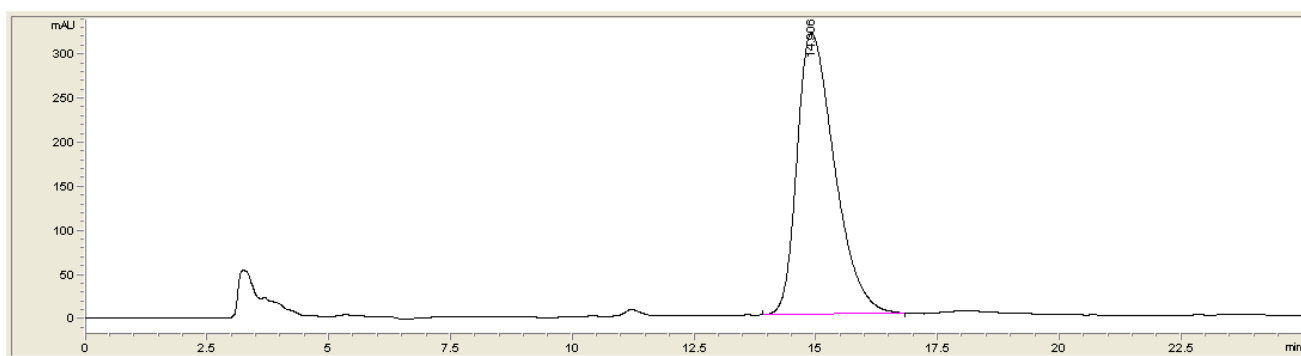

| 峰 # | 保留时间 [min] | 类型 | 峰宽 [min] | 峰面积 [mAU*s] | 峰高 [mAU]  | 峰面积 %    |
|-----|------------|----|----------|-------------|-----------|----------|
| 1   | 14.906     | BB | 0.8260   | 1.71037e4   | 318.78015 | 100.0000 |

HPLC for racemic and pure enantioenriched sample 2h

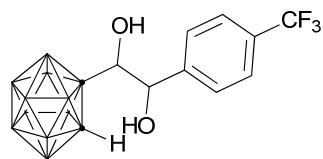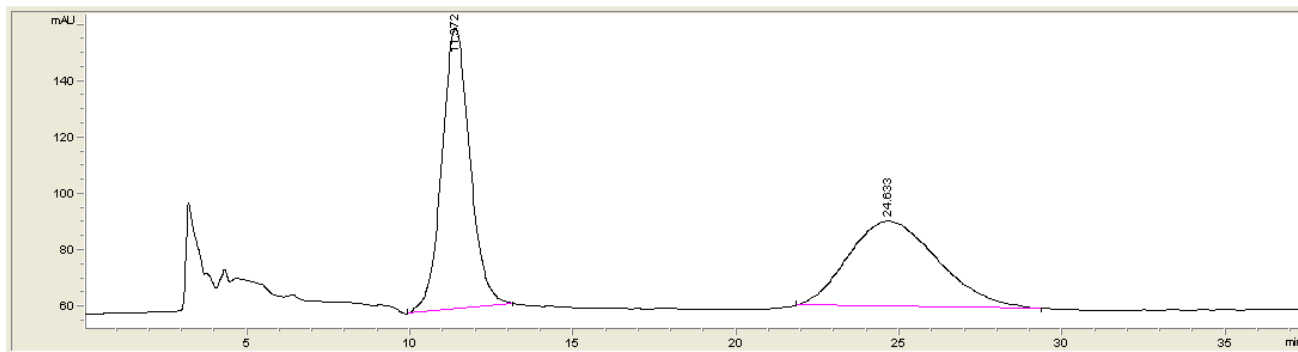

| 峰 # | 保留时间 [min] | 类型 | 峰宽 [min] | 峰面积 [mAU*s] | 峰高 [mAU] | 峰面积 %   |
|-----|------------|----|----------|-------------|----------|---------|
| 1   | 11.372     | BB | 0.9147   | 5990.68604  | 99.73912 | 50.9016 |
| 2   | 24.633     | BB | 2.2563   | 5778.47021  | 30.25425 | 49.0984 |

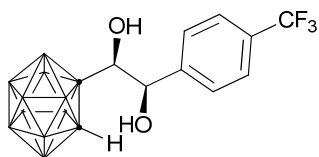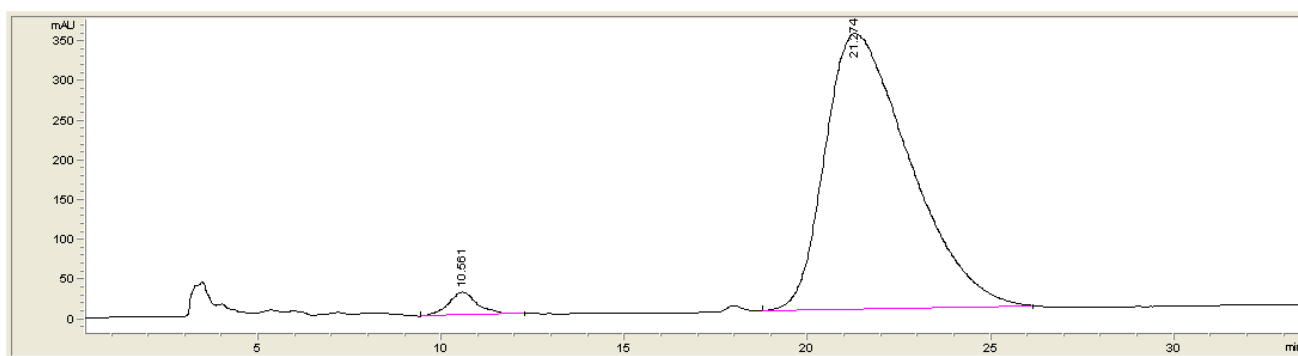

| 峰 # | 保留时间 [min] | 类型 | 峰宽 [min] | 峰面积 [mAU*s] | 峰高 [mAU]  | 峰面积 %   |
|-----|------------|----|----------|-------------|-----------|---------|
| 1   | 10.561     | BB | 0.8063   | 1566.56543  | 28.72444  | 2.7265  |
| 2   | 21.274     | BB | 2.1212   | 5.58908e4   | 348.09738 | 97.2735 |

HPLC for racemic and pure enantioenriched sample 2i

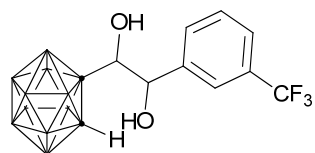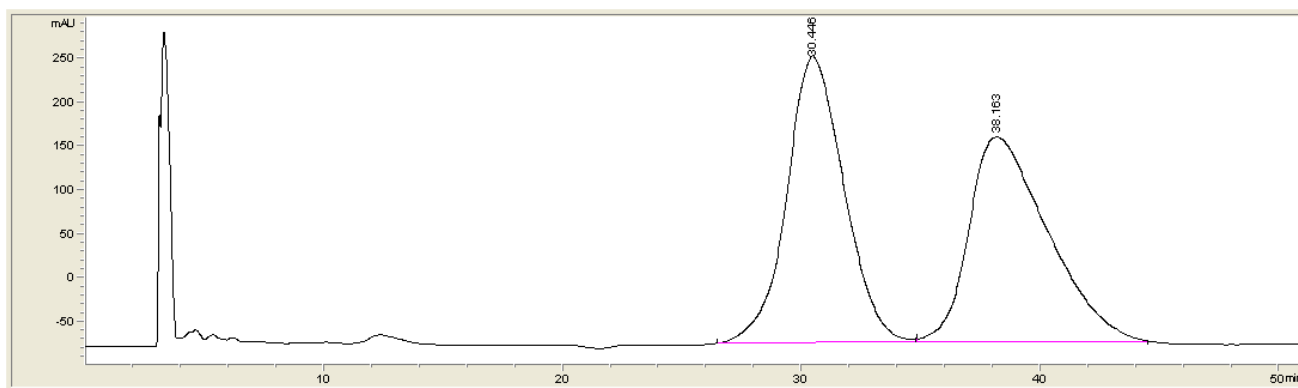

| 峰 # | 保留时间 [min] | 类型 | 峰宽 [min] | 峰面积 [mAU*s] | 峰高 [mAU]  | 峰面积 %   |
|-----|------------|----|----------|-------------|-----------|---------|
| 1   | 30.446     | BB | 2.3268   | 5.46414e4   | 327.45657 | 50.4037 |
| 2   | 38.163     | BB | 2.7996   | 5.37661e4   | 234.09047 | 49.5963 |

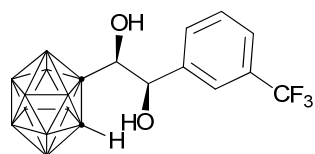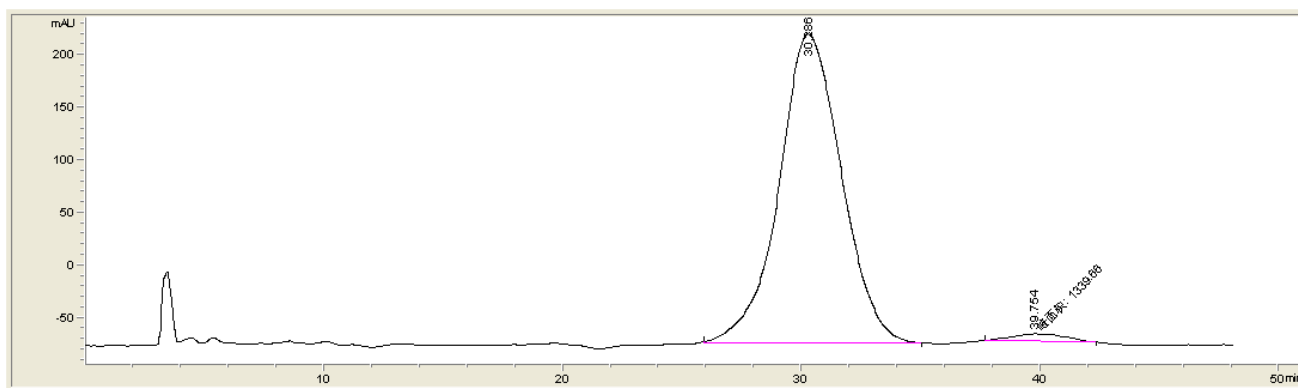

| 峰 # | 保留时间 [min] | 类型 | 峰宽 [min] | 峰面积 [mAU*s] | 峰高 [mAU]  | 峰面积 %   |
|-----|------------|----|----------|-------------|-----------|---------|
| 1   | 30.286     | BB | 2.4466   | 5.35593e4   | 295.21786 | 97.5598 |
| 2   | 39.754     | MM | 2.8032   | 1339.65540  | 7.96504   | 2.4402  |

HPLC for racemic and pure enantioenriched sample 2j

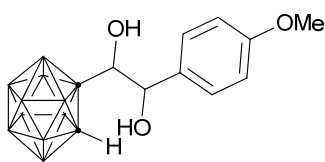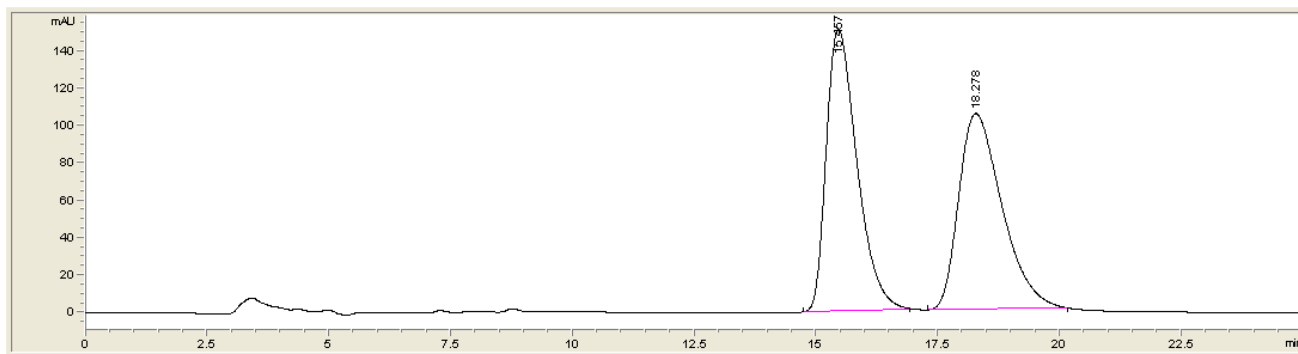

| 峰 # | 保留时间 [min] | 类型 | 峰宽 [min] | 峰面积 [mAU*s] | 峰高 [mAU]  | 峰面积 %   |
|-----|------------|----|----------|-------------|-----------|---------|
| 1   | 15.457     | BB | 0.6744   | 6628.87549  | 150.94138 | 50.5158 |
| 2   | 18.278     | BB | 0.9463   | 6493.51611  | 104.88640 | 49.4842 |

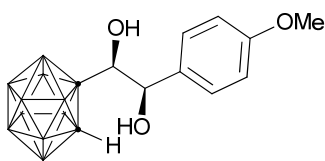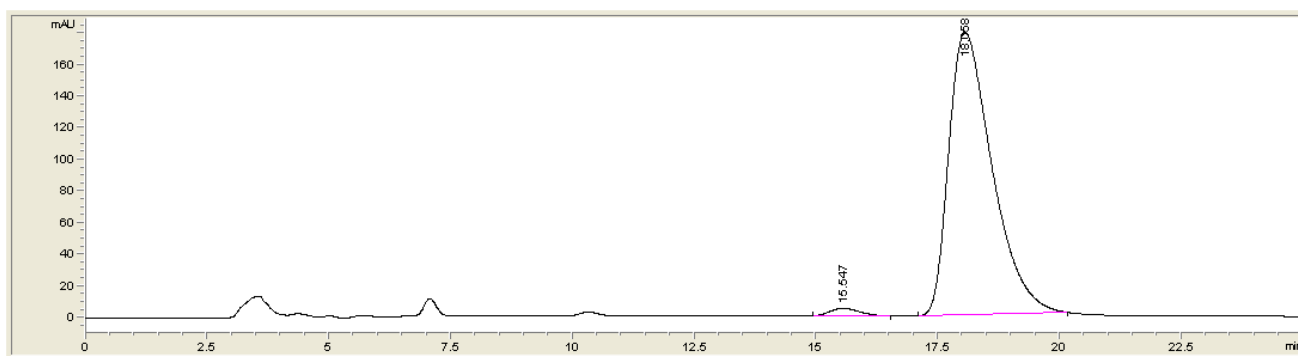

| 峰 # | 保留时间 [min] | 类型 | 峰宽 [min] | 峰面积 [mAU*s] | 峰高 [mAU]  | 峰面积 %   |
|-----|------------|----|----------|-------------|-----------|---------|
| 1   | 15.547     | BB | 0.6242   | 211.78210   | 4.93942   | 1.8699  |
| 2   | 18.058     | BB | 0.9586   | 1.11141e4   | 178.94246 | 98.1301 |



HPLC for racemic and pure enantioenriched sample 2k

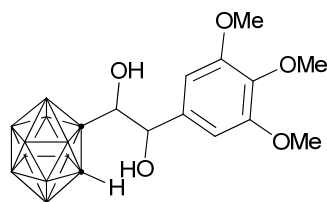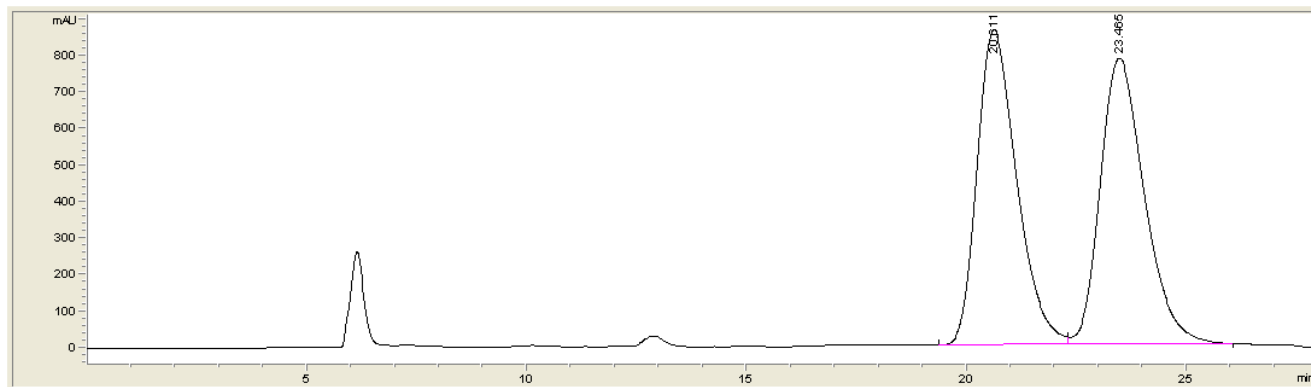

| 峰 # | 保留时间 [min] | 类型 | 峰宽 [min] | 峰面积 [mAU*s] | 峰高 [mAU]  | 峰面积 %   |
|-----|------------|----|----------|-------------|-----------|---------|
| 1   | 20.611     | BV | 0.9660   | 5.41040e4   | 862.30707 | 49.7314 |
| 2   | 23.465     | VB | 1.0716   | 5.46884e4   | 784.22723 | 50.2686 |

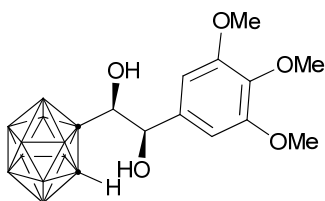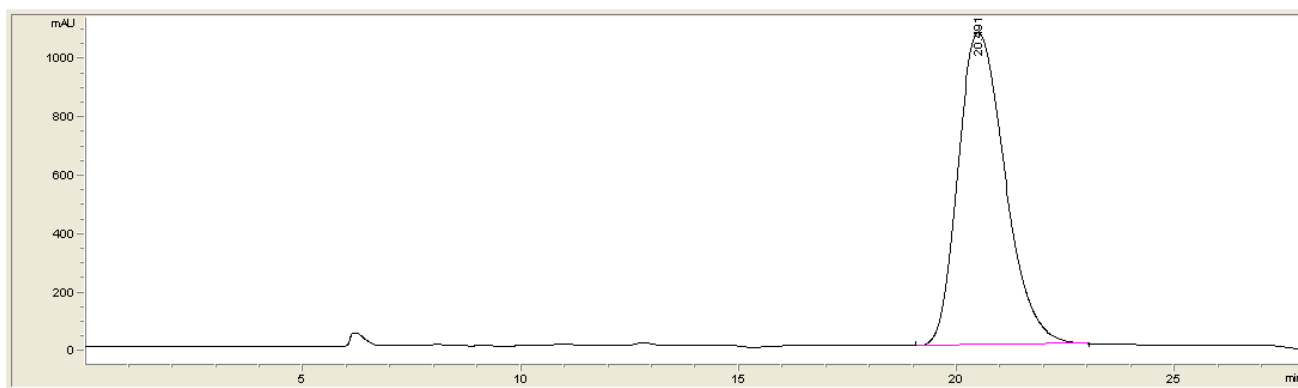

| 峰 # | 保留时间 [min] | 类型 | 峰宽 [min] | 峰面积 [mAU*s] | 峰高 [mAU]   | 峰面积 %    |
|-----|------------|----|----------|-------------|------------|----------|
| 1   | 20.491     | BB | 1.1679   | 7.99131e4   | 1066.83972 | 100.0000 |

HPLC for racemic and pure enantioenriched sample 21

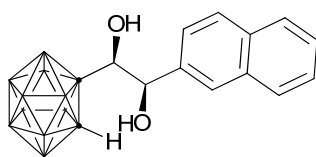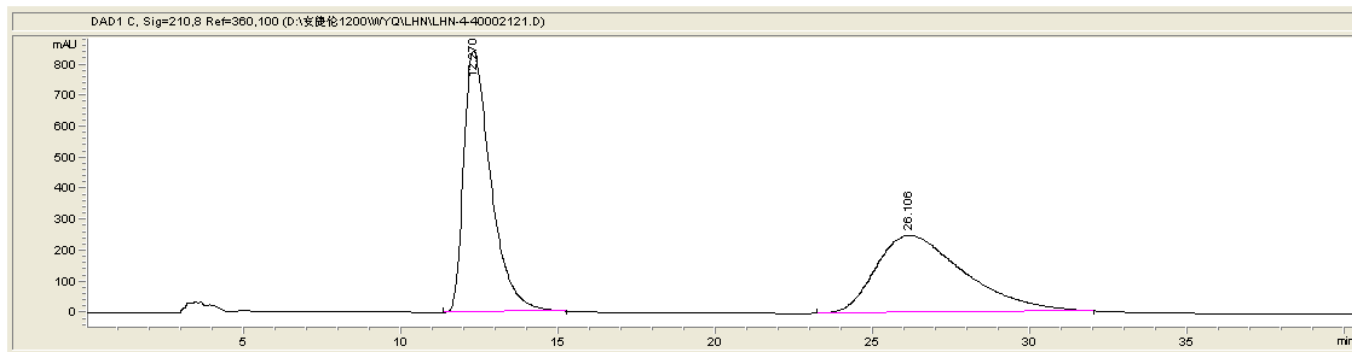

| 峰 # | 保留时间 [min] | 类型 | 峰宽 [min] | 峰面积 [mAU*s] | 峰高 [mAU]  | 峰面积 %   |
|-----|------------|----|----------|-------------|-----------|---------|
| 1   | 12.270     | BB | 0.9062   | 5.06228e4   | 841.11206 | 50.9287 |
| 2   | 26.106     | BB | 2.7403   | 4.87765e4   | 248.90213 | 49.0713 |

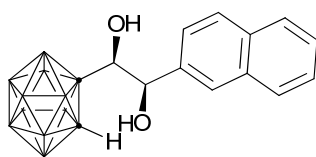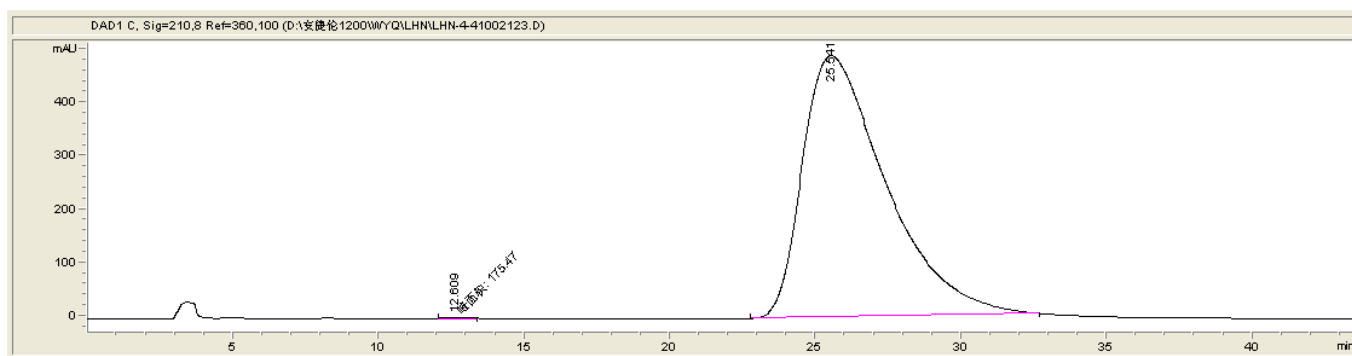

| 峰 # | 保留时间 [min] | 类型 | 峰宽 [min] | 峰面积 [mAU*s] | 峰高 [mAU]  | 峰面积 %   |
|-----|------------|----|----------|-------------|-----------|---------|
| 1   | 12.609     | MM | 0.9693   | 175.46973   | 3.01703   | 0.1791  |
| 2   | 25.541     | BB | 2.8452   | 9.78019e4   | 490.71027 | 99.8209 |

HPLC for racemic and pure enantioenriched sample 2a'

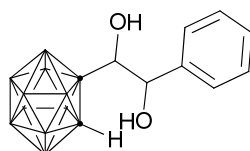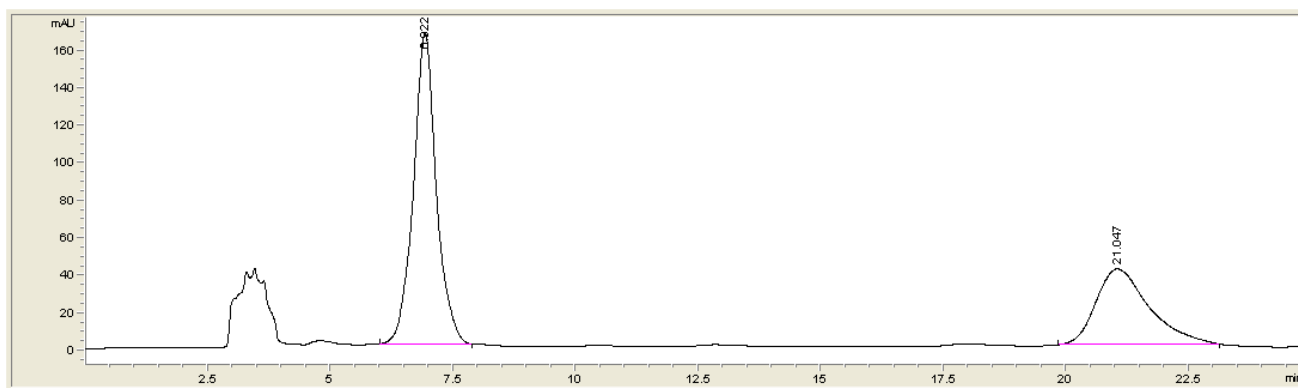

| 峰 # | 保留时间 [min] | 类型 | 峰宽 [min] | 峰面积 [mAU*s] | 峰高 [mAU]  | 峰面积 %   |
|-----|------------|----|----------|-------------|-----------|---------|
| 1   | 6.967      | VB | 0.4907   | 1.61468e4   | 487.13208 | 51.2696 |
| 2   | 21.124     | BB | 1.1707   | 1.53471e4   | 193.22076 | 48.7304 |

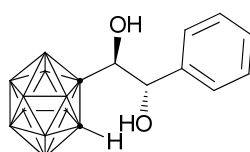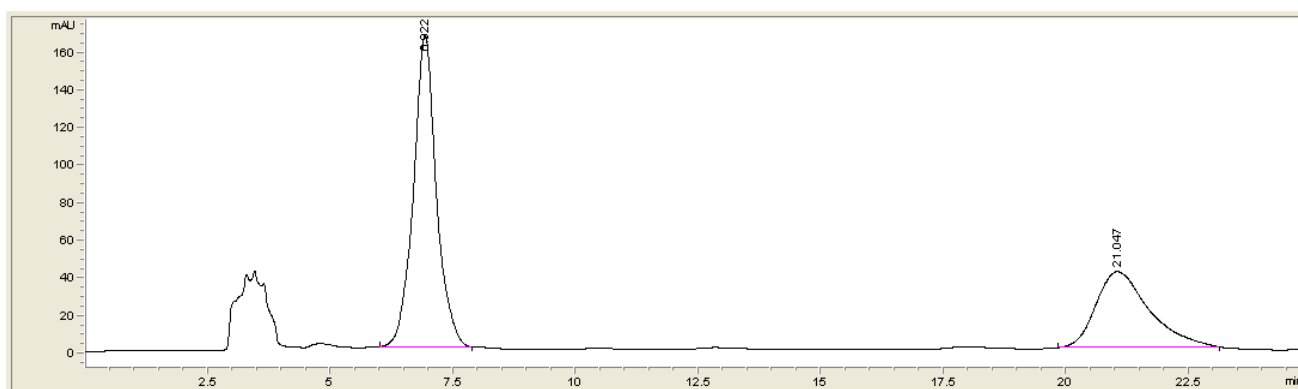

| 峰 # | 保留时间 [min] | 类型 | 峰宽 [min] | 峰面积 [mAU*s] | 峰高 [mAU]  | 峰面积 %   |
|-----|------------|----|----------|-------------|-----------|---------|
| 1   | 6.922      | BB | 0.4780   | 5411.22754  | 166.13103 | 63.6937 |
| 2   | 21.047     | BB | 1.0900   | 3084.47412  | 40.52200  | 36.3063 |

HPLC for racemic and pure enantioenriched sample 4

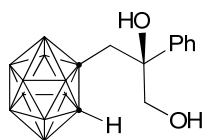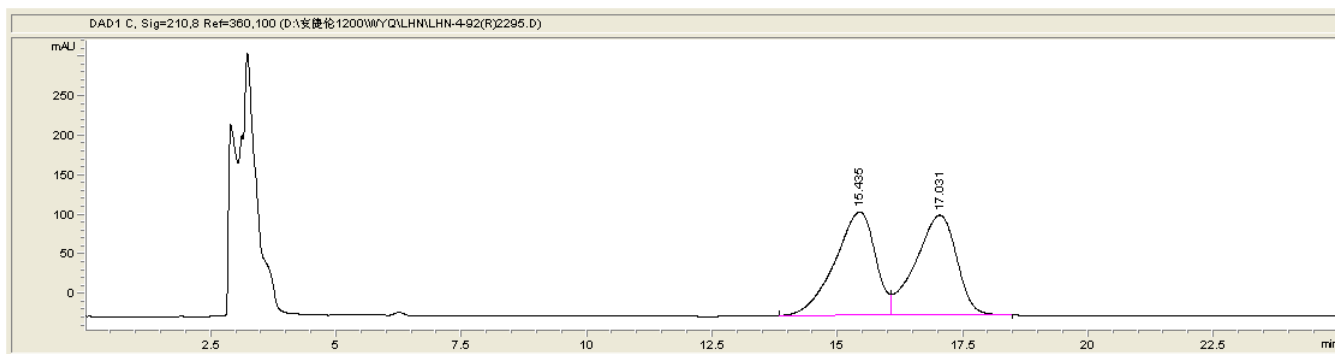

| 峰 # | 保留时间 [min] | 类型 | 峰宽 [min] | 峰面积 [mAU*s] | 峰高 [mAU]  | 峰面积 %   |
|-----|------------|----|----------|-------------|-----------|---------|
| 1   | 15.435     | BV | 0.8486   | 7435.73291  | 130.91412 | 50.6754 |
| 2   | 17.031     | VB | 0.8688   | 7237.52246  | 126.63398 | 49.3246 |

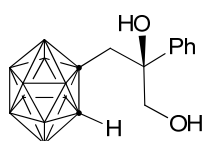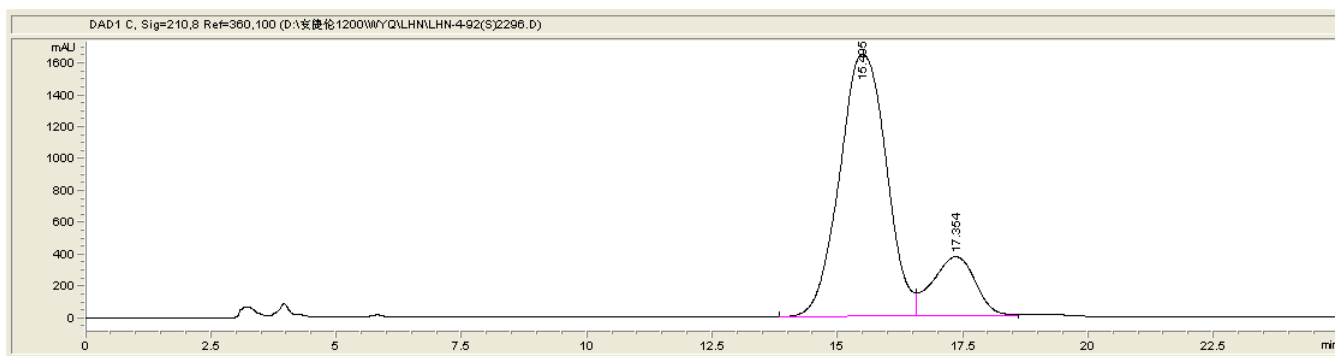

| 峰 # | 保留时间 [min] | 类型 | 峰宽 [min] | 峰面积 [mAU*s] | 峰高 [mAU]   | 峰面积 %   |
|-----|------------|----|----------|-------------|------------|---------|
| 1   | 15.495     | BV | 1.0100   | 1.07043e5   | 1647.53174 | 82.4574 |
| 2   | 17.354     | VV | 0.9222   | 2.27730e4   | 376.20502  | 17.5426 |
